# Supplementary material for: Transcriptome and co-expression network analysis reveals the molecular mechanism of inosine monophosphate-specific deposition in chicken muscle
Source: Frontiers journal article supplement (doi:10.3389/fphys.2023.1199311), 2023-05-17
Supplement: Data_Sheet_1.ZIP [file Data_Sheet_1.ZIP]

## Sheet: Sheet1
Table S4. FPKM for all genes generated by transcriptome sequencing in 15 samples
geneID	l27tho	l29tho	l30tho	l17leg	l18leg	l20leg	l2tho	l6tho	l10tho	PYs3tho	PYs2tho	PYs12tho	sh4tho	sh5tho	sh3tho
ENSGALG00000001299	0	0	0	0	0.211673	0	0	0	0	0.0975896	0	0	0	0.162174	0
ENSGALG00000025863	0	0	0	0	0	0	0	0	0	0	0	0	0	0	0
ENSGALG00000006619	15.4203	14.0899	13.3954	14.0731	14.3598	15.2888	14.0091	14.5791	13.7372	11.3782	14.8394	16.8914	17.5841	16.755	16.3383
ENSGALG00000027157	0.0659927	0	0	0.254034	0	0.0467965	0	0.0713989	0.324618	0	0.177065	0.0585784	0	0	0.104445
ENSGALG00000015200	67.1015	64.1007	65.2549	56.049	53.4645	59.138	62.1826	65.2918	59.5838	63.055	62.396	69.0773	53.5414	64.4894	74.5265
ENSGALG00000019702	39.8322	39.6546	42.7369	53.7601	52.0845	42.8887	50.5366	49.8566	44.5955	51.3122	47.5804	58.8481	52.5709	55.3516	64.8908
ENSGALG00000008521	1.03832	1.67617	1.28281	1.29425	1.23092	2.20887	1.34349	1.32972	1.22766	1.26925	1.30136	1.11603	1.04211	0.872088	0.849614
ENSGALG00000028281	0.0850376	0	0	0	0	0.120603	0	0	0.488017	0.0734651	0	0	0	0.183126	0
ENSGALG00000009317	20.8939	28.3339	21.4304	27.5205	25.7081	28.9184	23.1681	33.4998	34.8782	20.6602	16.8856	16.9823	21.4881	15.3595	28.4866
ENSGALG00000026699	0	0.525863	0	0	0	0.318051	0.098283	0.121315	0	0	0	0.497657	0	0	0
ENSGALG00000009205	0.872164	1.09074	1.40247	1.11911	1.55258	1.17508	1.22314	0.817798	1.46581	1.15533	0.871036	0.683855	1.65441	0.657361	1.24232
ENSGALG00000010040	2.11814	1.13889	3.73	2.83559	4.10809	3.80763	3.3584	2.65657	4.33577	4.75537	6.91391	2.45499	6.34105	4.99713	3.35233
ENSGALG00000028980	0	0	0	0	0	0	0	0	0	0	0	0	0	0	0
ENSGALG00000006507	1.16753	6.42697	2.60705	2.71134	3.87342	5.80899	4.71417	2.13291	1.17686	2.48028	2.53347	1.88584	2.40026	1.59373	1.84783
ENSGALG00000016367	0	0	0	0	0	0	0	0	0	0	0	0	0	0	0
ENSGALG00000023073	11.4019	13.2044	15.4769	22.7003	23.1249	20.1955	14.9545	14.0263	11.4325	19.5425	11.1711	16.7747	19.0044	10.4036	15.6583
ENSGALG00000005571	29.7443	21.9639	28.2352	26.1712	26.6131	23.2047	29.3708	31.4815	34.1358	29.0483	33.7486	32.0398	37.1377	32.9385	41.2644
ENSGALG00000019026	0.201121	0	0.163064	0	0	0.142618	0.176285	0.217597	0	0	0	0	0	0	0
ENSGALG00000029043	1.40966	1.70784	1.55563	1.10035	1.48583	0.63864	1.93918	2.16061	1.28409	1.99587	1.45336	2.27664	2.35211	2.26268	2.57189
ENSGALG00000029000	11.8032	33.4141	23.3154	9.62412	14.7784	15.8267	17.0704	20.8967	21.2008	28.3198	27.0628	23.2878	16.6791	12.3238	20.379
ENSGALG00000011502	6.65843	7.67808	5.68429	9.19706	8.14663	9.63762	6.69449	5.16986	5.52303	5.51544	4.55387	4.90212	4.4165	4.66711	3.31642
ENSGALG00000029084	7.6195	7.366	8.89387	8.69725	7.62062	6.85057	6.61032	7.97397	8.03516	8.89793	11.9291	6.69429	12.3976	7.11363	6.09127
ENSGALG00000023577	7.20743	10.4954	8.91217	15.2278	16.5274	23.2908	8.74055	9.64943	5.82796	8.61488	6.35777	9.23135	7.69947	9.56771	7.44845
ENSGALG00000026384	0.203707	0.152855	0.396386	0.407762	0.0763429	0.404466	0	0.0881582	0.0334013	0.563154	0.182189	0.216985	0	0.321696	0.0967211
ENSGALG00000023506	1.21721	2.02243	1.46623	1.49938	1.5966	2.17019	1.46318	1.42981	1.16898	0.991476	1.33746	1.97569	1.64923	1.07345	1.4586
ENSGALG00000017097	58.9385	33.9467	57.5398	24.2835	24.9108	22.7969	41.736	64.5325	56.3593	70.7434	45.208	74.2126	50.6053	51.3058	68.8006
ENSGALG00000004746	0	0	0	0	0	0	0	0	0	0	0	0	0	0	0
ENSGALG00000005721	0.721054	0.727362	0.838313	1.41401	1.6698	1.53393	0.655865	0.677089	0.446147	0.611175	0.608383	1.1714	0.415778	0.722671	0.742856
ENSGALG00000001972	22.4846	34.3138	27.3449	30.1516	24.7787	36.8545	30.2083	22.4821	23.4575	19.4645	20.6863	17.7499	18.6452	15.7761	19.5795
ENSGALG00000026906	16.8583	29.107	16.2801	22.1552	18.7124	22.9953	22.4943	16.1483	17.6064	10.8535	12.2925	13.058	12.3343	12.6408	11.2164
ENSGALG00000011436	154.419	141.218	150.419	133.741	128.951	141.418	124.265	134.671	100.981	141.76	91.6552	128.031	112.849	162.379	107.075
ENSGALG00000014953	4.58902	4.87589	5.45496	4.50006	2.71489	4.37414	4.62189	4.81696	7.17782	4.03973	5.67256	5.1884	5.95006	5.70442	6.06231
ENSGALG00000027809	0.0652843	0.183702	0	0	0.0305831	0.277765	0	0.176581	0.0267612	0.141	0.029194	0.0579496	0.0343994	0	0.129155
ENSGALG00000023070	0	0	0	0	0	0	0	0	0	0	0	0	0	0	0
ENSGALG00000009432	68.6516	85.7845	65.0001	45.7594	54.8239	71.3893	70.9773	102.316	89.996	65.3792	76.1314	70.9587	70.7693	56.0597	71.3723
ENSGALG00000001895	16.5702	27.0153	14.9915	19.9296	26.9187	30.8127	17.1421	12.8494	13.235	11.2432	10.3039	10.2265	12.8156	11.2308	10.6364
ENSGALG00000000274	0	0	0	0	0	0.112487	0	0	0	0	0	0.035202	0	0.0284671	0
ENSGALG00000025635	2.26936	0	0	0.873575	2.12621	1.60924	0	1.22764	0.93025	0	0	3.0216	2.39153	0	0
ENSGALG00000011116	0.788393	2.05998	1.05013	1.17059	0.923325	2.23625	1.82632	0.609271	0.46168	0.559477	0.30219	0.849777	0.830834	0.586137	0.980394
ENSGALG00000016509	0.813315	1.72646	0.751966	1.32922	1.51065	2.72179	1.37574	1.38938	0.912441	1.12175	1.02091	0.645946	0.796951	0.911572	1.01623
ENSGALG00000002229	20.108	22.5037	24.4326	14.2568	14.5401	17.0005	23.6266	22.9671	25.9794	20.3526	21.2478	21.1844	22.5422	26.0148	25.0192
Novel01159	0.136324	0.412015	0.159652	0.314863	0.198683	0.451126	0.238981	0.131104	0.111763	0.130858	0.0677355	0.295798	0.255401	0.18484	0.0958925
Novel00594	1.9908	1.22541	1.31145	1.86796	2.27323	1.6764	0.817953	0.403854	0.714054	2.0961	3.11588	0.607451	2.49134	0.401917	0.0984624
ENSGALG00000006083	1.05031	0.927194	0.851562	0.665919	0.419669	0.580497	0.744611	0.985949	0.937054	0.907373	0.939357	1.5904	1.23706	0.931328	1.43007
ENSGALG00000029166	13.4561	14.0948	12.3498	35.4437	42.6856	32.307	20.6553	9.3854	8.90382	4.30771	5.13154	4.97174	14.1805	7.40367	11.4591
ENSGALG00000002350	0.33233	0.513747	0.209568	0.758093	0.426687	0.401496	0.382996	0.399506	0.388502	0.207353	0.346762	0.202125	0.29185	0.348995	0.374999
ENSGALG00000008928	0	0	0	0.058065	0	0.0534817	0.0330535	0	0.0618321	0.0325783	0.0337266	0	0.0397402	0	0
ENSGALG00000009864	0.161101	1.75283	0.457159	0.285268	0.558473	1.54223	0.720159	0.435747	0.198114	0.473203	0.302575	0.200202	0.356525	0.231284	0.382457
ENSGALG00000027938	28.1915	36.5934	30.3315	32.1964	43.3126	47.6564	36.07	31.3683	29.1369	37.86	34.1757	26.6846	52.2374	50.9269	44.1953
ENSGALG00000024000	6.63962	23.4784	10.2281	7.3098	11.5084	17.1851	8.6132	8.1174	4.0281	7.74367	8.96674	9.01729	8.0466	5.76693	6.98808
ENSGALG00000001138	20.6383	42.8717	23.1615	30.342	34.8493	83.2622	31.0695	22.8336	17.1112	26.0898	14.5997	21.2176	24.5755	21.2594	22.0527
ENSGALG00000016508	6.31243	11.0693	11.7936	10.4945	11.657	12.7151	8.74045	7.32445	7.0502	5.76953	7.52749	7.47097	7.90556	8.86539	10.4973
ENSGALG00000010900	1.4781	6.00772	1.83756	2.12421	1.89264	4.89134	3.88673	1.7058	2.82753	1.61747	0.616915	1.70565	1.81728	1.13175	1.59856
Novel00884	0	0.327848	0.141697	0.269101	1.47368	0.61965	0.306372	0.378168	0	0.150983	0.312611	0	0.552525	0.250903	0.2766
ENSGALG00000025735	0	0	0	0.017373	0.0634265	0.048005	0	0	0.111	0	0	0	0	0.0485943	0
ENSGALG00000024085	0.0624167	0	0.101212	0.288323	0.175438	0.265564	0	0.20259	0.255857	0.269613	0	0.221617	0.131554	0	0.0493929
ENSGALG00000025737	0	0	0	0	0	0	0	0	0	0	0	0	0	0	0
Novel01664	0.143712	0	0	0.110642	0	0	0	0	0	0	0	0	0.151448	0	0
ENSGALG00000007998	0.0911281	0.0641058	0.0554133	0.210475	0.106725	0.177706	0.179719	0.0492967	0	0.0393634	0	0.0404449	0.0480169	0.114474	0
Novel00743	0	0.126994	0.109774	3.96103	0.824544	0.28803	0.0593374	0.0732427	0.111	0.175453	0	0.120182	0	0	0.0535713
ENSGALG00000005251	6.5932	13.1255	6.81837	4.60985	7.18583	6.20199	7.72504	6.76938	6.83939	8.13707	5.23485	9.07727	6.80633	6.56789	7.2938
ENSGALG00000004594	446.721	2931.24	755.467	968.901	976.053	2266.58	1411.34	993.64	429.745	831.314	522.316	622.627	473.362	397.85	619.791
ENSGALG00000025681	0	0	0	0	1.03229	0.781298	0	1.19205	0.903286	0	0	0	0	0.79089	0
ENSGALG00000026647	0	0	0	0	0	0	0	0	0	0	0	0	0	0	0
ENSGALG00000015937	28.6172	20.4703	35.6235	20.6967	17.7393	29.1071	40.5389	30.4925	18.8402	13.61	19.9067	26.0436	7.15867	8.81857	50.7819
ENSGALG00000029083	0.456598	0.16655	0.349632	0.371058	0.380263	0.359757	0.333513	0.247002	0.145575	0.547863	0.499113	0.382783	0.427714	0.254921	0.180662
ENSGALG00000023906	0	0	0.084205	0	0	0.0736469	0	0.112366	0.0851458	0	0	0	0	0	0
Novel00391	1.48355	2.41195	2.05817	3.14729	3.02703	2.66509	1.99387	2.74647	1.24329	1.79432	1.94602	2.16552	2.39723	1.39623	2.29581
ENSGALG00000012541	38.4905	32.4204	1.47497	2798.43	4777.03	2433.4	46.3262	73.9643	15.3069	27.6277	2.569	10.7088	66.0908	1.99316	16.5176
ENSGALG00000027990	0	0	0	0	0	0	0	0	0	0	0	0	0	0	0
Novel00040	3.47601	1.89311	4.09102	3.02143	4.09718	4.21417	2.94849	4.12471	4.22866	2.71236	2.50711	4.57845	3.30863	4.10493	2.92817
ENSGALG00000026588	0.0815996	0.229611	0.132318	0.355993	0.203872	0.462909	0	0	0	0.0939932	0.14596	0.169008	0.257977	0.312394	0.387438
ENSGALG00000004369	5.16706	4.60814	6.66172	2.93463	3.13482	3.18352	5.01161	7.78984	6.42365	3.7687	4.20457	7.14297	6.60568	7.02284	6.66961
ENSGALG00000008942	3.67159	6.10262	5.31891	4.3232	3.46528	6.5664	4.28306	2.59957	3.98395	1.88917	2.87328	3.37891	2.13378	4.0696	2.99094
ENSGALG00000028176	0	0	0	0	0	0	0	0	0	0	0	0	0	0	0
ENSGALG00000010166	24.2349	18.933	21.7307	14.6404	13.2599	12.9075	21.1325	22.4261	20.4333	21.4959	30.2253	27.4784	17.9722	18.9546	16.7828
ENSGALG00000007603	30.9048	19.9375	28.2489	20.1787	12.4688	19.8966	22.9572	19.798	21.9727	22.4036	30.1033	21.28	21.8162	23.4844	21.209
ENSGALG00000011376	167.057	62.1504	103.736	49.1347	58.7659	44.3045	58.8278	132.289	161.419	129.458	183.679	240.467	43.8517	182.635	87.9715
ENSGALG00000015075	1.59976	2.02243	0.451148	1.39228	0.912343	1.18374	0.914491	0.602024	0.627259	2.52376	0.684283	0.679145	0.659694	0.549209	0.935708
ENSGALG00000028650	0	0	0	0.508952	0	0	0	0	0	0	0	0	0	0	0
ENSGALG00000028720	0	0.0591269	0	0	0	0	0.0552536	0	0	0	0	0	0	0	0
Novel00918	2.32779	3.62242	3.51727	7.08708	4.0645	6.30258	2.92141	2.34677	2.03852	3.06222	2.60237	3.89773	2.23009	2.62034	3.2655
ENSGALG00000027487	0	0	0.095637	0	0	0	0	0	0	0	0	0	0	0	0
ENSGALG00000026180	0.026206	0	0	0.423688	0.491058	0.371662	0.0918799	0.19847	0.0214846	0.0226397	0	0.0232617	0	0.0564337	0
Novel01593	207.848	122.167	265.727	86.6068	119.463	82.7845	173.59	211.08	205.246	252.999	184.789	263.905	229.079	148.706	239.883
ENSGALG00000008241	3.46589	4.9823	3.80274	6.49683	5.15326	5.79701	4.16061	3.79058	3.55182	2.21313	2.72915	4.44755	5.83601	3.19099	4.15877
ENSGALG00000028981	0	0	0	0	0	0	0	0	0	0	0	0	0	0	0
ENSGALG00000009956	21.2415	18.5712	18.4796	13.2843	16.1438	17.9928	17.4184	18.5899	19.0239	20.5387	15.9416	19.2853	18.3115	18.6399	22.553
ENSGALG00000003771	11.4818	10.4975	11.9264	7.97656	8.4032	9.4167	10.1826	9.91285	9.50828	7.18064	10.632	7.85835	9.00365	10.0318	11.0287
ENSGALG00000001103	254.742	194.617	272.604	277.045	279.206	229.265	256.143	224.488	209.707	232.049	216.939	281.58	235.811	266.601	298.393
ENSGALG00000005051	3.62017	12.0731	6.64484	7.58716	8.00843	13.1922	6.08185	5.71191	4.86412	5.42971	6.25067	6.1591	6.99427	4.22279	5.61021
ENSGALG00000013672	0.455004	0.693509	0.399648	0.846561	0.781554	1.46537	0.664697	0.881999	0.761599	0.606004	0.576498	0.67314	0.859101	0.530744	0.555097
ENSGALG00000027139	0.205026	0	0	0.0631386	0.115256	0.174465	0.143767	0.0887288	0.0672349	0.0354249	0	0	0	0.0883032	0.0648981
Novel00003	0	0.157411	0	10.2502	4.3502	1.74542	0.098066	0	0.0458622	0	0	0	0.117905	0	0
ENSGALG00000026552	0	0	0	0	0	0	0.370199	0	0.34626	0	0	0	0	0	0
ENSGALG00000014320	4.02761	19.6117	7.56218	17.225	19.4094	32.5644	12.9725	5.10815	3.87074	4.34522	4.06751	4.75541	5.97063	2.37929	4.91044
ENSGALG00000006393	0	0.0466974	0	0.191649	0.139937	0.105913	0	0	0	0	0	0	0.104933	0	0
ENSGALG00000004274	0.223599	1.74772	0.604294	0.344291	0.977639	2.06125	1.24126	0.967666	0.122209	0.83707	0.199979	0.396955	1.09963	0.428011	0.530828
Novel00902	5.19655	1.8955	8.03635	0.666792	0.360648	0.47768	4.13311	40.397	36.0548	16.8767	12.6518	7.60244	1.21695	7.66763	18.0482
ENSGALG00000006856	32.694	31.1577	30.587	87.6657	84.5218	98.5016	40.1529	29.5414	27.2924	35.0227	23.034	32.1959	29.3022	28.4839	33.1562
ENSGALG00000003917	0.149359	0.233487	0	0.459957	0.139937	0.353042	0.0436384	0.10773	0.0816329	0.086022	0.0445271	0	0	0.107213	0.0393979
ENSGALG00000008381	10.048	9.12824	9.58131	13.8661	13.5588	15.3259	13.1832	13.8112	10.1546	11.5741	9.21266	12.397	14.2518	11.0232	14.2525
ENSGALG00000024012	7.63188	4.58769	5.12796	0.486934	0.276537	0.807298	3.84367	2.46344	4.25191	3.49699	6.03375	7.07385	2.35505	2.72403	2.73609
ENSGALG00000028856	0	0.328604	0	0	0	0	0	0	0	0	0	0	0	0	0
ENSGALG00000027648	79.8925	45.27	65.0101	44.3067	48.4821	48.4912	49.1715	75.7635	73.9833	67.9339	56.6607	56.1494	60.5458	61.0283	80.3671
ENSGALG00000029125	0	0	0	0	0	0	0	0	0	0	0	0	0	0	0
ENSGALG00000003254	29.4123	36.1066	34.595	23.0607	25.348	31.0247	30.4215	41.6067	32.3199	35.7605	31.0755	39.865	29.1628	29.1584	34.8362
ENSGALG00000004343	0.723604	0.763549	0.44001	4.59601	1.86438	1.89213	1.54598	0.733952	1.26062	0.312565	0.525822	1.3649	0.667237	0.616809	0.787348
ENSGALG00000027357	5.63138	12.7457	7.94049	10.7445	10.0935	21.3555	12.1254	10.6622	4.26552	13.749	9.47082	13.1487	15.9974	8.17253	10.5596
ENSGALG00000016100	5.66843	3.1275	6.82614	3.40139	1.17151	1.59601	5.26073	3.87809	2.93865	1.08023	1.26741	1.70186	1.05416	3.11153	0.791586
ENSGALG00000010422	4.65235	6.3968	6.08665	8.46602	7.5785	10.7969	4.26321	6.06305	2.99064	6.9423	5.34297	6.10063	4.17852	5.16113	6.19177
ENSGALG00000004153	1.75507	2.27721	1.94472	2.72492	2.38431	1.84608	2.25624	2.50014	1.82256	1.16244	2.38067	2.10314	1.72624	3.06557	2.10643
ENSGALG00000015483	10.5039	20.6182	18.8345	29.9328	28.8962	34.1118	15.398	16.6677	11.5318	13.4144	14.7858	16.0531	15.2724	16.2818	14.6486
ENSGALG00000008380	12.2384	14.6684	9.62223	11.0214	8.94998	15.4148	8.6629	10.5642	8.47149	11.0644	11.5609	9.57154	14.2079	15.9364	15.7469
ENSGALG00000010873	0.873834	0.887922	1.18081	1.34551	3.20662	2.42696	1.97865	0.78785	0.776099	1.69856	0.846654	2.58553	2.53241	1.20224	1.32538
ENSGALG00000016887	28.0115	31.888	29.8807	60.4369	40.4935	48.3314	32.6998	27.8607	29.5326	27.9177	25.7642	24.6558	21.5155	31.5175	20.893
ENSGALG00000008054	19.2371	35.0463	19.1963	42.9121	39.1089	53.5598	26.5895	24.6821	19.7141	23.1177	19.3556	15.3245	25.081	16.6857	21.3709
ENSGALG00000012823	2.27266	3.75399	2.10352	3.20519	3.24106	3.95052	1.9744	2.50236	2.11054	2.25876	2.19448	2.44579	2.79771	2.52645	1.71887
ENSGALG00000015608	0.34015	0.212698	0.689464	0.872923	2.54955	0.361809	0.695677	0.184008	0.325345	0.342837	0.709843	0.553546	0.238974	0.732502	0.942111
ENSGALG00000009202	12.3418	13.8598	9.73411	11.0207	10.4226	13.9909	10.5234	11.8086	11.013	10.5897	12.6149	11.2533	17.1203	10.6069	13.0885
ENSGALG00000024332	38.2599	47.1501	25.83	21.1272	18.0859	29.594	31.5781	33.7167	39.4221	30.0094	28.0493	36.4722	36.2405	35.7635	36.2063
ENSGALG00000015218	0.356147	0.346899	0.35539	2.97393	2.4256	1.57358	0.348187	0.518704	0.247061	0.201175	0.306274	0.534995	0.83725	0.953771	0.83466
ENSGALG00000013683	7.29435	9.45086	6.78522	8.4467	8.61268	9.78635	8.92594	7.31068	7.40913	7.63215	7.07903	6.5702	7.05797	7.12993	6.98157
ENSGALG00000027547	1.11799	46.1398	1.81288	1.72146	2.09494	5.54951	31.3581	1.20958	4.58285	0	11.9987	1.98477	5.89089	11.2353	6.193
ENSGALG00000026238	0	0	0	0	0	0	0	0	0	0	0	0	0	0	0
ENSGALG00000010208	0	0.130122	0.0374927	0.640834	1.55974	0.623042	0	0	0.0379116	0	0.0413582	0	0.0974649	0.0995829	0
ENSGALG00000007940	0	0.108755	0	0	0	0.054814	0.0677538	0.0836315	0	0.0333898	0.0345668	0	0	0.0554869	0
ENSGALG00000002303	0	0	0.0318708	0.0605269	0.0736587	0	0.13782	0.0425292	0	0.0339596	0.175783	0.0697852	0.0414251	0	0.0622136
Novel00591	0.101772	0.0954578	0.165028	0.940233	0.286056	0.0721681	0.178409	0	0.166872	0.263766	0.0910212	0.0903378	0	0.219162	0
ENSGALG00000023729	0	0	0	0	0	0	0	0	0.0928864	0.0978805	0	0	0	0	0
ENSGALG00000026832	0	0	0	0	0	0	0	0	0	0	0	0	0	0	0
ENSGALG00000001160	1.23817	5.80676	3.01163	1.6523	2.16545	8.78006	2.89407	3.75089	3.45132	4.34999	3.10065	6.44782	2.26169	3.43664	4.76842
ENSGALG00000001947	9.73785	11.0744	10.2038	7.32167	6.77599	9.47624	18.5848	13.0206	14.0683	9.60978	9.50711	9.84012	10.2621	8.97942	9.91409
Novel00510	33.0713	34.2349	41.0375	30.2739	50.0674	46.1878	26.1594	48.4346	36.2057	37.4555	33.1848	44.2126	23.8011	27.5028	37.341
ENSGALG00000016455	0.00889685	0	0	0.0205487	0.0250069	0.0504712	0.0155965	0	0.00729394	0	0	0	0.0187516	0.00638636	0.0281617
ENSGALG00000016605	0.402507	3.61018	0.775065	1.56879	0.848513	2.90776	2.07272	0.653222	0.226868	0.499864	0.224993	0.62525	0.371154	0.325045	0.577318
ENSGALG00000008507	6.13148	13.7484	9.28151	12.6186	11.9032	17.7531	9.70657	8.74704	6.30787	6.26551	6.8965	7.90007	8.00088	7.15671	6.7069
ENSGALG00000025211	0	0	0	0	0	0	0	0	0	0	0	0	0	0	0
ENSGALG00000011594	0	0	0.0276404	0	0	0	0	0	0	0	0	0	0	0	0
Novel01676	98.3106	90.9338	117.554	97.708	89.325	101.146	96.3724	116.813	115.721	113.599	103.65	110.346	105.169	94.389	137.272
Novel00867	1.81317	2.24732	2.5595	0.872458	0.27302	0.493635	1.63184	1.78655	0.331808	0.601394	0.680508	0.502956	1.56957	0.267279	1.25548
ENSGALG00000025850	0	0	0	0	0	0	0.666359	0	0	0	0	0	0	0	0
ENSGALG00000004040	8.77195	14.7395	10.4209	9.42587	10.1378	14.8024	12.1019	11.6221	11.4219	9.68551	9.20183	10.2431	11.1062	10.8986	13.1903
ENSGALG00000027470	28.6738	20.0816	31.5471	7.55022	10.3201	12.308	18.9612	28.3917	28.9677	26.1311	23.086	32.8029	20.6195	36.8069	25.9484
ENSGALG00000005085	0.148969	0.349316	0.04026	0.0573444	0	0.545786	0.478769	0.214896	0	0.0214493	0.199848	0.0440773	0.0784939	0.0534664	0.0392949
ENSGALG00000007777	1.07037	3.16634	2.15844	3.44415	2.51998	4.41786	2.02073	1.18775	1.26004	0.758733	0.662746	0.974474	1.04122	1.22145	0.977337
ENSGALG00000028680	0	0	0	0	0	0	0	0	0	0	0	0	0	0	0
ENSGALG00000009398	1.87996	6.53719	3.68044	10.5198	7.26027	12.7783	5.5061	2.82771	2.06753	2.61444	1.76339	2.07575	3.43079	1.1849	2.50366
ENSGALG00000026356	0.0984762	0.738933	0.638736	0.151631	0	0	0.604211	0	0.0807341	0	0.0880736	0	0	0	0
Novel01482	0.437756	6.15895	4.61398	8.08853	8.06612	21.7294	12.79	5.05192	13.1592	5.54668	10.1794	9.32577	14.9161	0.942692	11.0852
Novel01421	70.4744	224.157	104.83	118.056	183.356	341.69	119.653	77.8488	63.085	70.9512	64.5188	53.0335	60.6232	64.7952	43.9128
ENSGALG00000001926	793.401	940.295	936.815	3017.92	2406.17	1472.93	899.182	456.634	928.125	769.797	642.327	776.907	930.1	641.232	767.955
ENSGALG00000016616	0.101908	1.02755	1.03281	1.58877	1.69477	2.18601	1.18355	1.1577	0.856366	0.770349	1.1165	0.859359	1.15449	0.768096	0.745958
ENSGALG00000009404	1.64511	1.89611	2.29461	3.35957	2.36425	3.59858	1.89411	2.54915	2.09165	1.6019	1.79552	1.76966	2.08628	1.60122	2.07412
ENSGALG00000029139	0.232725	1.41886	0.220136	0.537516	0.327067	0.220039	0.713956	0.125895	0.190796	0.167545	0.381593	0.241008	0.0817512	0.167055	0.153471
ENSGALG00000027287	1.77299	2.11653	1.72064	2.46113	4.8576	2.45736	0.965396	2.09262	1.23332	2.62247	2.13829	2.40838	2.32139	1.11842	2.21085
ENSGALG00000000895	68.3531	57.1868	63.5851	54.2798	42.0114	57.3663	61.4835	62.8618	76.0204	64.6559	67.9287	61.8827	57.7169	63.062	58.487
ENSGALG00000000080	0.367203	0.344421	0.287453	0.282704	0.225405	0.3412	0.277465	0.410984	0.301045	0.470377	0.441659	0.269749	0.49372	0.190873	0.340683
ENSGALG00000005001	500.898	363.855	452.715	591.749	415.542	419.251	411.597	346.937	432.179	438.809	401.709	511.206	409.872	443.419	397.944
Novel01767	0.595874	0.465754	0.4026	0.573444	0.465238	0.422544	1.39278	0.644689	0.692067	0.857972	0.310875	0.48485	1.15124	1.42577	0.550129
ENSGALG00000006463	107.502	133.329	151.045	125.899	117.6	121.998	126.504	131.731	123.03	151.88	99.1562	150.781	150.635	90.9523	142.568
ENSGALG00000014570	7.72837	14.2614	10.046	20.8895	19.204	18.0493	11.3391	9.36123	10.5026	7.32979	7.06224	7.41933	8.27719	9.07513	9.10717
ENSGALG00000011794	16.3082	15.954	20.1671	15.0196	11.1097	17.0116	18.5426	15.8633	21.392	15.8796	15.5942	17.5876	13.1707	15.448	15.9447
ENSGALG00000006503	160.089	103.928	159.506	84.9539	119.581	87.243	76.228	125.709	125.435	166.164	101.544	189.311	203.086	170.469	148.368
ENSGALG00000012446	0	0	0.203174	0.217044	0.645659	0.111062	0.0549121	0	0.102722	0.0270613	0.0280152	0.0278048	0.0660207	0	0
Novel01710	0.581699	2.18244	0.943254	0.206696	0.12577	0.190381	1.52961	1.16188	0.807056	1.46896	1.32064	0.992971	0.377239	0.160599	0.389503
ENSGALG00000028240	0	0	0	0	0	0	0	0	0	0	0	0	0	0	0
ENSGALG00000020906	1.72781	0.225085	0.93391	7.24229	2.60809	6.50046	1.89306	0.675044	1.33782	0.787802	0.0858496	0.852049	2.22545	0.275613	0.455762
ENSGALG00000008666	0	2.04408	0.271833	0.0645309	0	0.713247	0.220405	1.08822	0.0687175	0.144824	0	0.223205	0.0883309	0.240668	0.132658
ENSGALG00000025809	53.1384	33.6815	41.6351	49.2186	66.0332	31.19	30.04	42.2329	33.8633	66.7065	63.4999	59.8522	51.2147	55.8536	46.9388
ENSGALG00000021644	0.216591	1.01577	4.03896	0.166751	1.01464	0.460766	1.32892	0.703005	0.177569	2.05828	2.32454	3.07612	0.228251	0.466422	0
ENSGALG00000002119	7.31818	7.73692	6.21886	8.59646	7.63409	10.2897	7.53869	5.0608	5.05129	5.77912	6.20775	6.78618	5.35344	5.57809	4.67672
ENSGALG00000002862	5.85369	5.49052	7.0386	9.70081	8.04074	10.5884	5.69612	5.31348	6.08016	4.45709	5.74556	4.60157	5.38464	2.54607	3.21903
ENSGALG00000026486	0	0	0	0	0	0	0	0	0	0	0	0	0	0	0
ENSGALG00000015505	21.1976	18.3279	22.0313	26.8302	21.6585	26.8465	21.3327	17.8377	30.2158	16.5042	22.8983	19.513	22.9823	27.2387	21.2616
ENSGALG00000028480	0	0	0	0.0840941	0	0	0	0	0	0	0	0	0	0	0
ENSGALG00000005672	0	0	0.0296908	0	0	0	0	0	0	0	0	0	0	0.0262868	0
ENSGALG00000028200	0.820399	1.15425	0.776018	0.421076	0.640539	0.484798	0.539319	0.221902	0.672591	0.177188	0.366868	0.849598	1.00866	0.49075	0.486911
ENSGALG00000025915	1.24184	4.3437	1.91931	5.92565	3.86621	6.35687	9.20679	4.73048	4.63447	1.77689	2.02463	2.05536	1.81308	1.14213	2.79459
ENSGALG00000006020	118.989	86.7081	138.186	242.546	126.303	135.181	128.954	128.026	175.987	120.055	114.594	113.588	131.277	116.725	134.614
ENSGALG00000006096	219.639	332.151	250.198	287.563	319.275	343.287	219.492	264.999	223.27	278.979	197.192	238.87	225.688	209.207	239.753
ENSGALG00000024408	0	0	0	0	0	0	0	0	0	0	0	0	0	0	0
Novel01747	19.6125	23.8954	23.1143	43.5858	64.0294	41.2924	19.3173	22.7504	17.4051	19.5636	26.7631	22.2548	18.9637	32.3655	18.2402
ENSGALG00000018621	0	0	0	0	0	0.0324952	0	0	0	0	0	0	0	0	0
ENSGALG00000008680	11.2569	10.3469	14.431	12.2269	21.157	11.9177	12.6153	11.6665	12.2989	6.31442	11.0968	9.17119	6.65653	8.51767	7.24783
ENSGALG00000028485	5.23881	3.88532	3.35848	4.22088	2.39709	4.66525	4.05795	3.03171	3.59577	1.68405	2.942	2.59547	2.31104	3.32326	1.63899
ENSGALG00000028993	0	0	0	0	0	0	0	0	0	0	0	0	0	0	0
ENSGALG00000003532	73.8398	152.364	106.232	156.288	139.619	202.424	112.064	104.492	74.9067	71.6897	75.8572	77.8463	101.994	64.9799	70.0452
ENSGALG00000009182	0	0	0	0	0	0	0	0	0	0	0	0	0	0	0
ENSGALG00000002248	5.62282	10.566	5.72978	11.2819	14.8482	15.3754	9.72195	6.52096	6.36213	4.95744	6.68217	5.9312	4.99204	4.14676	4.96766
ENSGALG00000026607	10.5277	7.05325	10.4962	7.33322	7.21121	6.37797	9.04676	11.5816	16.5125	11.821	10.497	13.5069	9.60275	18.0564	17.4554
ENSGALG00000011292	23.6754	24.3648	32.4296	20.3725	18.3249	25.6099	24.565	31.9943	35.4595	29.6629	26.9624	31.1003	40.0297	29.46	39.0496
ENSGALG00000001852	5.2118	11.7674	6.88241	8.40941	7.86548	12.0832	7.30369	6.8543	5.62885	6.41679	5.10784	5.73433	8.05766	7.6391	7.58181
ENSGALG00000003743	16.9896	12.5783	26.4274	22.3389	21.7753	22.5046	19.0328	14.6638	20.1887	12.1213	14.2986	13.471	10.8632	13.0519	15.8615
ENSGALG00000001763	2.03717	3.21359	3.2283	3.63582	2.68948	3.67714	3.12482	4.00738	4.02353	1.39995	2.36029	2.46586	2.63476	1.39586	2.78453
ENSGALG00000010084	46.2713	40.3331	47.1843	25.7047	28.9444	33.502	38.7976	47.4288	62.651	31.262	42.0908	35.0238	29.1259	48.3587	34.9191
ENSGALG00000026322	4.39946	5.52196	5.34185	5.77605	3.7436	6.04354	6.05442	5.72565	5.54093	4.92078	6.23474	4.69754	6.92085	7.94848	8.71209
ENSGALG00000008988	2.01447	2.31677	1.90413	2.81347	2.29523	3.23745	2.52879	1.74141	1.79262	1.70535	1.64776	1.57249	1.9309	2.03462	1.69026
ENSGALG00000009015	6.77119	10.3835	11.2703	9.40554	10.5399	16.183	10.143	13.9541	12.3361	11.1114	10.9263	14.1198	6.53162	9.41241	14.4022
ENSGALG00000027123	0	0	0	0	0	0.413628	0.511273	1.26217	0.47821	0.503922	0.173895	0.690356	0	0.139569	0.46159
Novel00235	0.114753	0.16145	0.139558	0.574252	0.268785	0.203432	0	0.37246	0.235195	0.148704	0	0.20372	0.12093	0.041186	0.227021
ENSGALG00000018236	0	0	0	0	0	0	0	0	0	0	0	0	0	0	0
ENSGALG00000025202	0	0	3.0819	1.95098	1.18713	1.79699	0	2.74172	0	0	1.13321	0	0	1.81905	0
ENSGALG00000027698	14.8399	17.3874	19.7066	18.7507	16.8601	21.6757	16.5509	17.7092	20.2501	20.9556	15.6974	16.7612	21.1461	21.4817	22.0823
ENSGALG00000011660	21.191	32.6759	21.2257	31.9944	36.9273	41.66	27.3915	23.5514	25.1808	21.1565	22.2341	20.9693	27.6757	18.7922	22.6091
ENSGALG00000028335	0	0	0	0	0	0	0	0	0	0	0	0	0	0	0
ENSGALG00000011334	70.1634	67.6921	65.8328	102.955	74.7894	85.9184	61.2217	68.0289	74.7921	57.1488	58.5022	57.9692	67.2642	65.6752	57.6121
ENSGALG00000002437	0.494462	1.70055	1.06906	2.53786	3.66756	2.65895	1.4808	0.891616	0.439159	1.5307	1.69521	0.69494	1.21585	0.650716	0.913005
ENSGALG00000004994	7.68047	15.3847	9.46383	42.3938	33.7845	33.1396	13.9966	10.7979	18.9257	6.89767	9.39171	11.3241	8.50548	16.6019	6.00919
ENSGALG00000025529	0	0.848893	0	0	0	1.92534	0	0	0	0	0	0	0	0	0
ENSGALG00000013061	4.63012	6.38421	4.89575	6.60367	6.19721	7.30798	6.56447	5.19411	9.16621	4.68205	5.09517	4.10992	5.1492	3.85967	3.91727
ENSGALG00000000981	6.35857	6.5484	6.30488	5.39153	5.33354	7.82976	6.51484	7.08865	7.5729	6.99647	6.24405	6.33064	6.8367	7.43244	6.93572
ENSGALG00000024294	0	0	0	0	0	0	0	0	0	0	0	0	0	0	0
ENSGALG00000012928	0	0.120859	0	0	0	0	0	0	0	0	0	0	0	0	0
ENSGALG00000012714	2.90417	5.86536	3.91172	8.94351	3.77425	9.44995	7.92404	2.33122	2.16972	3.64202	1.98993	3.76288	4.61544	2.47135	1.92751
ENSGALG00000003647	0	0	0	0	0	0	0	0	0	0	0	0	0	0	0
ENSGALG00000015097	0	0.144835	0	0	0.144674	0.109498	0.180463	0.0556883	0	0	0.0460344	0.0456888	0	0	0.0407316
Novel00116	1.1672	1.45971	0.757069	1.07833	2.55167	2.04161	0.818455	1.26282	1.53106	0.33612	1.67024	1.31235	0.574015	1.17298	1.29311
ENSGALG00000008176	0.699678	1.1315	1.07588	1.83891	1.78578	2.01883	0.740164	1.09634	1.02856	1.33398	0.906284	0.899479	1.39841	0.900575	1.06918
ENSGALG00000007284	0.75936	2.05456	0.923505	2.13611	1.86074	1.55329	1.48478	4.42383	0.311275	1.41297	0.522419	1.03699	0.18467	0.314472	0.34668
Novel01698	0.809623	1.32894	0.426674	2.15044	1.47917	2.35388	0.74513	0.700759	0.398254	0.384694	0.21723	0.862394	2.51696	0.755515	1.37748
ENSGALG00000005674	21.6918	28.2537	27.3182	38.4938	32.693	35.2062	24.4528	25.4008	26.3275	25.9221	23.7464	23.9839	27.4252	27.7585	28.1691
ENSGALG00000016463	1.62371	10.8881	3.04555	7.23922	5.42668	11.0672	6.13891	2.46466	1.84775	2.34489	2.08075	2.06513	2.45175	1.86138	2.45475
Novel00291	0.575106	0.565113	0.777137	0.379514	0.641462	0.388397	0.792141	1.24444	0.78582	0.922707	1.4206	1.23977	0.750367	0.648724	0.845195
ENSGALG00000007288	0	0	0	0	0	0	0	0	0	0	0	0	0	0	0
ENSGALG00000016281	8.60803	7.17013	9.11855	11.8702	10.919	11.8046	10.079	10.4048	11.6859	9.39771	10.7065	8.65128	7.89916	10.7379	10.7885
ENSGALG00000009926	0	0.211698	0.0609976	0	0	0.560169	0.0329717	0	0.0616791	0	0	0	0	0	0
ENSGALG00000016070	10.6527	8.73824	9.05129	10.5922	10.3859	9.00351	8.64819	9.65414	8.92684	8.48989	8.85946	10.5376	13.7531	10.9764	9.23872
ENSGALG00000009733	83.7698	61.4984	93.758	71.0533	71.9537	56.7345	61.7376	89.5548	88.3643	84.4633	76.7023	97.8837	77.2007	74.2711	88.5332
ENSGALG00000022938	2.81433	4.37276	3.64094	4.56894	3.19855	3.65297	3.36772	2.80659	3.44086	3.41444	3.84122	3.64945	4.08769	4.02281	3.78606
ENSGALG00000005832	25.2119	20.4883	34.0135	20.9348	21.8045	20.0496	21.8481	31.2088	24.1508	34.3027	23.6076	32.1646	21.535	32.3706	31.7604
ENSGALG00000018339	0	0	0	0	0	0	0	0	0	0	0	0	0	0	0
ENSGALG00000012151	0	0.26949	0.326127	0.04424	0.269191	0.285236	0.151102	0.186511	0.14133	0.347501	0.308358	0.204028	0.121113	0.247489	0.0909456
ENSGALG00000016511	0.0835057	0.986894	0.446849	1.90298	3.2547	2.81865	1.20038	1.02995	0.177998	0.129855	0.433171	0.207547	0.404805	0.0359653	0.528651
ENSGALG00000006542	9.46173	13.7522	9.04929	14.3346	19.2983	21.1177	12.9625	9.7154	9.58713	10.2341	9.30166	9.54705	10.4523	10.1969	11.2211
ENSGALG00000016157	0	0	0	0.0450574	0.274165	0.221338	0.222291	0	0	0	0.0174475	0	0	0	0
ENSGALG00000025089	0	4.34799	0	0	0	0	0	0	0	0.800949	0.829181	4.11478	0.977026	0	0
ENSGALG00000016142	0.127986	0.510193	0.622606	0.517306	0.389715	1.0437	0.308499	0.726971	0.498404	0.414632	0.372015	0.142008	0.236032	0.229678	0.278521
ENSGALG00000015678	1.64531	3.69885	2.60442	4.68477	4.11072	4.18535	2.10598	2.5995	1.60581	2.52694	2.28901	3.33818	3.71545	2.26834	3.30666
ENSGALG00000004710	6.31059	11.719	7.76056	15.7492	20.2375	20.0021	10.9142	9.9435	7.91671	8.48872	6.55307	7.06779	8.07856	4.95551	10.3563
ENSGALG00000009315	0.377338	0.689226	0.322038	0.810361	1.63742	1.05622	0.0522225	0.429737	0.0325636	0.137258	0.515097	0.229172	0.523225	0.356396	0.361466
ENSGALG00000027411	26.8997	30.5773	24.406	20.4631	29.0432	23.7075	23.6903	23.837	15.8048	25.9502	17.5281	27.0043	21.3958	22.7113	32.7411
ENSGALG00000012566	0.0358095	0.0671757	0.116134	0	0.0671012	0.0507862	0	0.0387431	0.0293579	0	0.0960803	0.0953589	0.0377372	0.0257049	0
ENSGALG00000009887	4.4916	5.41664	5.36888	5.88852	4.61707	6.46114	5.55674	5.33163	4.81864	4.0134	3.74167	3.73636	4.35473	4.99286	4.46837
ENSGALG00000004802	2.98655	10.5047	4.12938	6.93896	6.64561	9.47341	5.46924	4.87566	3.08245	2.53404	2.45642	3.50312	3.90605	2.66062	3.35515
ENSGALG00000010118	0.536998	0.647591	0.55978	0.531549	0.862498	1.08798	0.874134	0.829986	0.817606	0.596468	1.64665	0.408571	0.727594	1.21147	0.910603
ENSGALG00000009503	6.97332	7.41728	6.0618	6.03283	5.33789	7.49381	6.55332	5.40566	6.76311	5.3567	6.89573	5.79104	5.60624	5.94738	6.45695
ENSGALG00000004581	6.45151	7.50461	7.78898	17.9048	18.16	20.0975	8.86503	7.17815	7.87601	8.62804	9.14634	8.60253	11.1483	10.8496	11.9496
ENSGALG00000027862	0.104716	0.098219	0.339604	0.846501	0.343385	0.222767	0.229462	0.226588	0.214624	0.135698	0.187308	2.92795	2.59329	0.375836	0.372896
ENSGALG00000015094	1.5729	1.74169	1.39925	2.45555	2.37427	2.52507	1.76164	1.89084	1.2537	1.52871	1.38721	1.97793	1.33527	1.17611	1.19284
ENSGALG00000028219	0	0	0	0	0	0	0	0	0	0	0	0	0	0	0
ENSGALG00000004514	1.92278	0.416189	0.71951	1.9358	0.97003	2.93671	0.129642	1.4402	1.09132	1.02222	0.925973	1.05031	1.55868	0.42468	0.936351
ENSGALG00000002500	17.0585	54.6132	29.42	37.5773	25.8675	59.2935	29.3855	23.4166	13.5809	18.4852	16.447	17.5489	21.5617	20.3493	18.1808
Novel01006	0.482689	1.07526	0.880543	1.34711	1.30019	0.727351	0.793284	0.783348	0.915115	0.677628	0.863401	1.49961	1.97111	0.671315	1.36077
ENSGALG00000001304	35.0632	31.3847	37.3154	46.2906	44.8027	29.273	20.4515	52.4995	51.1332	51.5565	42.3665	65.6615	27.8988	54.4334	53.3126
Novel00358	0.38081	0.194828	0.421025	0.986153	0.291918	0.540078	0.36413	0.636738	0.283819	0.299079	0.526356	0.215108	0.547241	0.0745511	0.328746
ENSGALG00000026466	3.4595	3.28493	2.04306	5.35972	5.28207	8.08643	13.2897	23.5665	10.2244	11.1062	10.7337	28.0165	15.4831	4.69069	8.31432
ENSGALG00000009019	0.127343	0.955538	0	0	0	0.541805	0.111618	0	0	0	0	0	0	0	0.100771
Novel00320	0.200062	0.5004	0.270342	0.513417	0.562326	0.803915	0.292263	0.505053	0.109345	0.172836	0.536786	0.177585	0.0702773	0.191479	0.422179
ENSGALG00000024592	0	0	0.449913	0	0.519912	1.1805	0	0	0	0	0	0.492572	0	0	0
ENSGALG00000017324	31.3431	14.178	20.0053	13.3488	17.078	16.7088	22.9913	30.0627	30.6166	19.9722	20.6762	19.5344	14.2897	15.797	23.0439
ENSGALG00000002329	3.60643	7.98314	7.48545	10.6619	9.73133	9.92263	6.32219	7.02338	4.73068	7.47755	7.09603	6.4025	5.01676	5.2811	8.90422
ENSGALG00000008122	32.1222	28.288	35.8248	29.9657	31.5088	38.3339	31.3229	35.3694	36.3884	32.9864	29.0089	34.1958	30.6732	32.7388	37.4427
ENSGALG00000010624	153.508	104.401	163.662	80.8405	85.4879	84.2712	118.112	145.874	157.172	168.146	143.686	195.01	206.163	146.112	176.284
ENSGALG00000006263	0.259663	0.432984	0.187136	0.577521	0.243283	0.245508	0.126444	0.49944	0.118267	0.124626	0.516075	0.5122	0.304046	0.207102	0.228313
ENSGALG00000011418	0	0.803007	0.277649	0.0439411	0	1.05229	0.150081	0.123501	0.0467918	0.0493076	0	0	0.0601473	0.163878	0
ENSGALG00000000856	7.00242	6.9861	6.4153	4.49017	5.69058	7.02023	6.44706	7.71674	6.94381	12.2594	8.4555	10.6673	10.0414	8.53303	9.39227
ENSGALG00000002314	0.0141624	0.0265674	0	0.054517	0.053076	0.0200855	0.0248271	0.0306451	0	0.0489402	0	0	0.0149248	0	0.0336218
ENSGALG00000004556	0	0	0	0.0316718	0.0385433	0.0583437	0	0	0.0674532	0.0355399	0.0367927	0.0365164	0	0	0
ENSGALG00000010131	9.18477	10.326	10.3189	8.0674	7.49245	10.3788	11.4902	9.40936	13.1123	9.12599	10.2445	10.0169	10.3498	9.37946	10.4072
ENSGALG00000019293	0	0	0	0	0	0	0	0	0	0	0	0	0	0	0
ENSGALG00000006093	0	0	0	0.193167	0.235076	0.355839	0	0.135729	0.205699	0	0	0	0	0	0
ENSGALG00000008840	0.590677	3.55231	1.04233	0.989758	2.14856	3.819	1.67503	1.09017	0.484257	0.840484	0.528281	1.04863	0.366162	0.698354	1.01734
ENSGALG00000008234	1.07758	1.01073	1.02657	0.891839	0.681486	1.64289	0.94452	0.728664	0.507978	0.861119	0.385502	0.502172	1.16398	0.580135	0.66087
Novel00129	0	0.202289	0.26229	0.166041	0.101033	1.07054	0.378076	0.233338	0.0884067	0.65212	0.0964438	0.382878	0.22728	0.774063	0.0853341
ENSGALG00000015446	0.720176	2.0476	1.36852	2.16583	1.7923	2.63324	1.38085	1.24181	0.904088	1.24434	1.75115	1.45832	1.61276	1.17931	1.44257
ENSGALG00000027103	0	0	0	0	0	0	0	0	0	0	0	0	0	0	0
ENSGALG00000009817	3.72665	5.12665	4.60415	3.68883	3.29205	5.61243	4.16863	4.22394	3.92816	3.52612	3.80912	4.00105	3.51583	3.71962	4.32527
ENSGALG00000010110	4.15164	10.9236	6.60095	10.004	10.9115	14.7965	11.0587	5.19177	6.05586	5.49644	5.15974	4.59454	8.29571	7.04397	7.97874
ENSGALG00000016160	0.0693104	0.130021	0.337171	0.236313	0.389629	0.245746	0.295079	0.128552	0.0974109	0.299391	0.407355	0.219726	0.709547	0.106613	0.313418
ENSGALG00000005472	1.54182	3.39292	0.865433	0.273929	0.77784	2.73332	1.45539	0.320794	1.40989	0.409846	0.795548	0.842213	1.8123	0.468241	0.516198
ENSGALG00000003669	27.1534	27.3256	25.1535	21.36	23.309	23.9901	23.4637	24.1992	28.9227	20.5227	22.6467	20.6407	20.7685	22.6727	20.3185
ENSGALG00000028701	0	0	0	0	0	0	0	0	0	0	0	0	0	0	0
ENSGALG00000028638	5.2903	7.35124	8.89621	1.20679	0.550732	1.38942	3.60658	12.0833	15.0998	8.97145	4.20574	12.0007	22.7133	4.50073	11.1638
Novel00650	0.0634588	0.267848	0.205803	0.195424	0.118911	0.719994	0.0278113	0.343287	0.0520257	0.164469	0.0567553	0.168987	0.2675	0.136656	0.527283
ENSGALG00000026627	0.0153242	0.0143735	0	0.117979	0	0.0217333	0	0	0	0	0	0	0	0	0
ENSGALG00000029066	21.2274	40.0313	27.2532	41.0121	27.2045	51.4591	35.5208	27.3363	24.835	24.5032	28.0561	28.5625	25.7753	26.3193	26.0317
ENSGALG00000008669	0.629781	3.8818	0.6565	0.277063	0.25288	2.87092	0.709731	0.486696	0.147519	0.466351	0.402325	0.638886	0.189624	0.193745	0.142392
ENSGALG00000015908	1.19373	5.56963	1.11054	9.05484	5.73552	13.7175	1.72375	8.98268	0.50815	0.674296	0.506439	0.849048	0.451586	0.944769	0.326992
ENSGALG00000008811	2.65794	7.35898	2.49252	4.24055	3.03034	7.10771	2.94725	1.87093	2.36285	1.88125	2.46309	3.04154	2.39606	1.65507	4.07997
ENSGALG00000025764	2.1758	28.5511	4.89052	5.78827	6.45875	22.181	11.2728	6.24636	2.29597	4.91327	4.08458	3.7862	8.62685	2.96903	5.36995
ENSGALG00000022788	0.0530521	0	0.0430133	0	0	0	0	0	0	0	0.189792	0.0470916	0	0	0
ENSGALG00000006551	0	0	0	0	0	0	0	0	0	0	0	0	0	0	0
ENSGALG00000011812	12.8608	58.102	16.0419	26.7162	30.0883	33.5653	22.0786	14.1614	11.7915	10.7819	12.1829	12.902	10.1849	13.3834	13.9712
ENSGALG00000001117	2.95498	3.69553	2.94033	4.65341	4.36261	5.5878	3.57118	3.77834	2.86307	1.97265	4.08438	5.04726	4.52953	4.75652	4.39335
ENSGALG00000027436	0	0	0	0	0	0	0	0	0	0	0	0	0	0	0
ENSGALG00000022789	16.3359	18.5431	18.5262	42.9787	53.0602	42.809	20.0284	18.1112	14.9659	16.9484	14.0005	17.5485	25.0912	11.5631	16.6236
ENSGALG00000027097	0.136278	0.0913022	0.0789219	0.794382	0.328323	0.704069	0.204771	0.33701	0.143647	0.201827	0.226353	0.224653	0.266712	0.153722	0.215684
ENSGALG00000006720	1.47714	1.75496	0.958104	1.9712	0	1.74578	0.949475	0	1.21101	0.0850748	0.440368	2.0979	0.622664	0	0
ENSGALG00000006641	3.92835	6.54258	3.69542	5.07941	4.69505	5.57131	4.72344	4.90404	3.55091	3.48077	5.7205	4.64933	4.98901	5.31434	3.60684
ENSGALG00000007434	2.253	1.45641	3.46822	4.55907	3.10927	2.67713	1.72127	2.76697	2.9828	2.9459	2.58683	2.0269	1.58821	3.9885	2.49364
ENSGALG00000026608	0	0	0	0	0	0	0	0	0	0	0	0	0	0	0
ENSGALG00000003445	18.7508	30.6285	22.442	33.4875	28.0848	35.3668	20.0131	28.4292	19.0327	28.5412	24.4135	32.0428	33.8746	23.5316	23.5191
ENSGALG00000014441	11.4096	8.46985	11.5509	7.51583	6.60259	7.67973	0	0	0	12.6243	9.49499	13.7293	11.4773	11.1245	12.8191
Novel01423	41.2942	34.9583	32.1067	15.3253	19.4438	23.1256	28.2135	36.6581	34.028	29.4544	28.2199	36.4668	26.3334	48.643	27.4828
ENSGALG00000009497	0.0505812	0.0593039	0.0717675	0.136296	0.236953	0.161406	0.0775867	0.0547249	0.0207341	0.0218489	0	0.101021	0.0399781	0.0816937	0.140094
ENSGALG00000013359	12.5384	22.3822	15.4296	20.8898	14.2549	20.7169	20.3513	16.4342	13.0017	10.6823	15.3361	13.5932	14.0491	12.5223	13.2165
ENSGALG00000001188	0.11139	0.679114	0.564451	5.42416	2.86999	3.0608	1.92829	0.753219	0.7534	0.168405	0.149435	0.642689	0.557585	0.179906	0.749252
ENSGALG00000011648	16.9382	11.1849	14.6287	19.7788	19.3197	16.7513	13.0839	11.3387	12.8183	13.067	18.0875	16.1414	13.7905	19.6612	17.1023
ENSGALG00000011982	2.84502	6.79507	3.54324	7.1807	8.46382	10.0248	5.42445	3.74448	2.93359	4.05418	3.98723	3.72298	4.23453	3.22123	3.50472
ENSGALG00000000774	0.959521	3.13843	1.61575	1.38274	1.56748	2.73909	1.57425	0.851796	0.84716	1.19028	1.38626	1.44137	2.12606	1.51882	1.67437
ENSGALG00000027621	0	3.6861	0.769102	0.625984	0.571347	1.82581	0.890854	0.219924	0.166649	0.234145	0.242399	0.300723	0.499833	0.340463	0.107238
ENSGALG00000023447	144.129	120.417	139.975	92.0581	100.778	96.4316	116.194	171.53	150.109	159.333	146.966	175.794	120.948	144.523	151.017
ENSGALG00000026328	40.4498	49.9213	73.9991	35.3715	34.4236	39.5921	64.0475	72.3695	62.4393	58.0243	64.3076	65.4706	47.9828	59.4518	74.073
ENSGALG00000021242	43.8981	50.1582	47.2397	47.4688	53.9351	52.7776	45.2984	39.0749	46.5406	41.1994	46.667	41.8001	48.6795	41.1792	44.3704
ENSGALG00000005975	0.0833135	0.312579	0.135097	0.128284	0.195145	0.384013	0.365128	0.0450694	0	0.0719757	0.260794	0.295813	0.219496	0.209315	0.197788
ENSGALG00000009494	11.2612	10.6422	13.437	24.0138	17.1998	19.7678	8.64143	14.2526	13.7265	11.7846	12.9601	13.1645	7.92653	8.57159	10.2229
ENSGALG00000024128	0.427099	2.16992	1.32741	0.57543	0.433503	3.65959	0.99829	0.616117	0.583584	0.522716	0.50931	0.284336	0.525106	0.587613	1.1266
Novel00854	0	0.844254	0.112273	0.0533056	0.0648706	0.932861	0.0606884	0.149821	0	0.0598158	0	0.0614593	0	0	0
ENSGALG00000016595	2.5039	13.8484	3.39517	7.21232	6.02667	18.674	6.69764	2.75573	1.84043	2.57341	2.27801	2.0693	3.09364	1.82834	0.956556
ENSGALG00000025954	0.219548	1.14196	0.485466	0.153661	0.243099	0.311371	0.349886	0.151158	0.179993	0.103457	0.232058	0.372047	0.210334	0.0859618	0
ENSGALG00000029137	0	0	0	0	0	0	0	0	0	0	0.641442	0	0	0	0
Novel01354	19.4041	35.3139	25.8293	31.4387	26.9988	32.3457	26.1466	25.6938	21.2505	26.146	30.9529	18.895	20.7539	25.2588	21.887
ENSGALG00000025656	0.496886	1.86424	0	3.44291	4.18988	1.05705	0	0.537592	1.22209	2.14633	1.33319	0.441061	0	0.356676	0.393206
ENSGALG00000010139	0.356082	0.723646	0.817991	0.9595	1.89052	1.72544	1.50854	0.192627	0.291929	0.256354	0.424624	0.263397	0.500335	0.724211	0.328746
ENSGALG00000025552	0	0	0	0.688582	0	0	0	0	0.733256	0	0	0	0	0	0
ENSGALG00000001740	0.569364	23.218	5.6714	2.06648	6.17275	29.5118	4.37268	1.58402	1.28921	8.12774	4.53447	4.0191	4.34296	5.13796	3.75467
ENSGALG00000002963	6.04469	18.7535	6.59734	15.6616	13.7228	17.4753	10.9022	9.18099	4.66974	3.41444	7.79735	5.98467	5.51258	6.42507	9.10687
ENSGALG00000008796	11.6552	11.9756	14.3464	19.1292	13.6003	19.7981	12.8164	10.2026	11.3795	11.8083	9.23945	11.4273	11.4452	9.43116	8.72013
ENSGALG00000003798	39.5183	27.997	33.5743	38.8938	37.4193	28.2218	35.3139	28.428	31.307	30.8716	26.3825	43.1638	40.6119	46.3228	42.8609
ENSGALG00000013293	2.37277	4.00601	1.30817	5.11494	5.11312	3.36514	2.28775	1.95104	0.778112	4.09974	1.48549	2.27468	0.800161	1.32852	1.84012
ENSGALG00000025586	0	0	0	0	0	0	0	0	0	0	0	0	0	0	0
ENSGALG00000005852	0.0280426	0	0	0.0215896	0.0262737	0.0198855	0.0983193	0	0.0229903	0	0	0	0	0.0603889	0.0221913
ENSGALG00000019587	0	0	0	0	0	0	0	0	0	0	0	0	0	0	0
ENSGALG00000004066	0.113046	0.636196	0.504103	0.391647	0.688449	0.120244	0.544977	0.244614	0.139019	0.0976621	0.404418	0.301036	0.178698	0.162294	0.223645
ENSGALG00000028013	0	0	0	0	0	0	0.70143	0	0	0	0	0	0	0	1.26654
ENSGALG00000002018	8.02775	18.1799	10.6823	12.8961	10.4368	17.2304	10.2427	8.88238	6.56785	7.40716	8.58608	7.86045	10.6926	8.36453	8.85446
ENSGALG00000028441	0	0	0	0	0	0	0	0	0	0	0	0	0	0	0
Novel00224	0.492948	2.31183	0.843748	4.89151	0.872388	3.34022	1.34424	1.65925	1.52674	1.46687	0.930738	1.3127	1.03897	0.707698	1.73373
ENSGALG00000004410	123.893	115.275	174.737	58.1473	69.8991	59.7934	94.6702	237.854	179.945	165.665	159.58	163.607	96.1095	143.963	161.232
Novel01731	0.164198	0.66738	0.0887517	0.653137	0.30768	0.388118	0.455753	3.67142	0.0224358	0.260063	4.01398	0.340084	0.346074	1.06078	1.7758
ENSGALG00000011604	2.34159	0.988341	0.901789	8.19503	3.75702	2.86429	2.27479	1.74172	3.03155	2.31794	3.83943	3.29098	4.0202	6.27515	3.42804
Novel01737	0	0.417611	0.135369	0.514168	0.365004	0.789305	0	0	0	0.336563	0.497751	0.0988028	0.1173	0.159799	0.264248
ENSGALG00000003162	15.9599	17.053	14.0718	12.9224	10.3156	15.1199	13.0157	16.3061	14.125	11.7869	12.6281	12.9839	16.0165	15.3738	13.7094
ENSGALG00000021824	0	0	0	0	0	0	0	0	0	0	0.0623216	0	0	0	0
ENSGALG00000003069	0.275781	1.20713	0.223596	1.48624	0.344512	3.84603	0.88633	0.596747	0.602919	0.317668	0.739946	0.73439	0.290627	0.131974	0.290982
ENSGALG00000011202	0.368791	0.0988316	0.256291	0.770659	0.394888	0.336234	0.36943	0.513004	0.0431925	0.728236	1.2251	0.748245	0.499685	1.28581	0.875517
Novel01355	18.2914	29.1815	17.6109	28.1646	31.1383	31.2108	28.4867	19.4365	16.4687	17.0014	25.4152	17.1062	23.2345	14.5954	23.0045
ENSGALG00000023859	0.189349	0.0888007	0	0	0	0.268541	0.165967	0.307291	0	0	0.0846735	0.75634	0	0.135919	0
ENSGALG00000019640	0	0	0	0	0	0	0	0	0	0	0	0	0	0	0
Novel01659	14.1075	28.6698	15.6743	9.25209	11.2594	20.0077	13.2814	11.0234	6.8538	11.7362	11.2153	7.88453	7.43346	9.37653	6.82233
ENSGALG00000015006	0.0369944	0.242895	0.239953	0.142408	0.0346608	0.629601	0.129705	0.120075	0.0303293	0	0	0.164191	0.233916	0.0265554	0.0878256
ENSGALG00000025783	0	0	0	0	0	0	0	0	0	0	0	0	0	0	0
ENSGALG00000019240	0	0	0	0	0	0	0	0	0	0	0	0	0	0	0
ENSGALG00000002125	0.879276	1.14193	1.48063	80.4	103.864	37.7943	5.51347	4.9029	4.26971	1.51924	3.14558	1.4409	2.99366	2.52466	1.98037
ENSGALG00000017009	25.8938	22.8397	31.576	22.1063	21.0649	24.3201	20.2413	28.7365	40.5514	24.4604	29.225	26.1304	29.4562	34.6303	27.1853
Novel01777	5.65543	7.53337	5.98527	9.34228	10.0927	14.0306	10.1502	11.7062	8.63665	8.27986	9.91769	9.50574	12.2536	7.63022	9.75305
ENSGALG00000014964	3.95434	9.14192	7.54106	3.4303	4.5398	6.59553	5.80928	9.52069	9.22344	10.2486	10.5601	10.6291	6.57363	6.47661	5.50921
ENSGALG00000000998	91.7938	77.7895	91.0817	79.7162	63.6342	43.395	78.1457	80.892	92.1509	81.1473	73.3311	84.6039	83.824	66.2975	92.9754
ENSGALG00000027880	2.37574	2.22834	3.85238	0.914523	0	1.68467	2.08237	2.57036	2.43464	0.513108	2.12478	2.10882	0	0.426339	4.23004
ENSGALG00000010804	6.34111	5.1416	9.30314	15.1644	15.1248	15.2192	9.38562	10.0773	9.02624	5.1571	5.65049	6.63896	6.16843	5.13535	6.24949
ENSGALG00000010395	15.0489	20.9998	15.3929	9.06039	9.5278	14.4806	14.197	13.0431	16.9432	11.9028	13.2392	11.2835	12.0995	10.0371	9.47512
Novel01076	116.426	117.5	105.056	90.9232	96.7625	111.888	112.317	111.738	121.126	78.0698	86.8085	65.148	61.9766	77.2237	92.3218
ENSGALG00000022113	0.050784	0.0952665	0	0	0	0.108035	0	0	0	0	0	0.0450784	0	0.145815	0
ENSGALG00000027321	0	0	0	0	0	0	0	0	0	0	0	0	0	0	0
ENSGALG00000028194	0.185725	0.116135	0	0.619612	0.406023	2.80962	0.0542637	0.0669801	0	0.0534835	0	0.054953	0	0	0
ENSGALG00000007624	0.269906	0.506322	0.364722	0.277063	0.421467	0.255193	0	0.0973391	0.221278	0	0.32186	0.159721	0.284436	0	0.142392
ENSGALG00000009346	12.7931	13.5166	9.95508	11.321	8.88627	13.712	13.5334	11.2957	17.5407	13.3388	14.9269	10.8337	9.45278	13.8276	13.2074
ENSGALG00000001081	0.0234931	0	0.0190476	0	0.0220111	0.049978	0.0205921	0.0254177	0.0192604	0	0	0.0417072	0.0247578	0.0337277	0.111546
ENSGALG00000000223	89.9661	73.3719	84.4449	31.2986	27.547	33.3032	79.5428	108.24	84.2253	87.1055	67.9928	115.814	87.1792	71.9893	94.7315
ENSGALG00000014277	2.63971	9.90375	4.60145	6.80812	6.4303	11.2312	7.98242	3.42715	2.48874	2.96462	3.06912	3.04608	3.75544	2.74752	3.55114
ENSGALG00000012529	83.5689	66.9459	74.8982	75.8623	78.603	89.4829	64.7769	75.059	72.7591	89.2851	68.8318	69.0028	73.841	98.1056	74.9425
ENSGALG00000028426	0	0	0	0	0	0	0	0	0	0	0	0	0	0	0
ENSGALG00000014790	6.11757	11.8945	9.35162	10.3518	9.31397	10.6192	11.227	11.6517	12.3295	8.91853	5.52834	7.86257	8.12578	5.99233	7.2112
ENSGALG00000027143	5.34792	7.14311	6.41967	6.48873	5.06368	7.62479	5.847	5.11133	5.15904	4.68544	5.23932	5.46837	6.57179	5.72437	5.56294
ENSGALG00000005822	0.0295697	0.0832054	0.0479487	0.113826	0.0831131	0.12581	0.0518365	0	0	0.153274	0.0793382	0.183732	0	0.127355	0.140398
ENSGALG00000001076	1.3084	9.66441	2.54155	2.3714	2.09419	5.48954	3.70332	1.79898	1.05033	1.67197	1.8528	1.37917	1.80972	1.09573	1.94136
ENSGALG00000028316	0	2.70786	0.780228	0.74088	0.90162	0.6824	0	0	0.788946	1.66273	0	1.70841	0	2.07233	0
ENSGALG00000007110	77.6519	51.4518	48.6008	76.2372	65.6975	49.8682	71.2745	67.4969	88.8594	48.1813	72.817	67.934	70.4636	84.1583	56.6975
ENSGALG00000004935	34.2904	45.8447	36.7458	37.7832	39.9412	43.6602	42.0843	35.7694	36.9384	31.8342	33.2238	33.0333	35.506	28.7168	33.6562
ENSGALG00000006092	10.2949	10.4246	9.58666	7.00083	7.06139	10.9988	8.66458	9.24739	9.91765	7.69072	8.98756	7.05365	10.0721	10.9182	10.2212
Novel00632	1.65629	4.50524	4.29721	5.99322	6.05205	5.98995	4.64564	7.70548	4.48101	3.57722	3.25892	3.52849	3.66544	10.5814	6.81557
ENSGALG00000005476	0.344193	0.443903	0.348829	0.198742	0.322481	0.305091	0.226268	0.605133	0.0352726	0.334522	0.153917	0.0381903	0.181361	0.370604	0.0680934
Novel01046	46.7306	59.1898	47.4139	38.6377	44.2809	60.1299	37.6516	40.7807	57.0094	30.3588	35.3278	39.0737	58.6024	68.0044	72.3188
ENSGALG00000008215	122.682	52.7273	109.474	0.089358	0.326235	0.192044	69.2131	113.227	68.829	112.17	150.103	139.876	94.8347	141.441	107.187
ENSGALG00000003548	1.69986	4.51181	4.57447	4.39946	3.8291	7.92486	4.88198	2.73911	2.40174	3.99941	2.42601	2.88935	3.23971	2.38847	3.09103
ENSGALG00000027066	0	0	0	0.06174	0	0.04265	0.0351455	0.0216908	0	0	0.0179306	0	0.0211277	0	0
ENSGALG00000026524	0	0.258359	0	0	0	0	0	0	0	0	0.123175	0	0	0	0
ENSGALG00000003863	1.00345	6.16261	1.60778	2.04173	2.37277	5.13344	2.53392	1.62849	0.528857	1.77508	1.00429	1.99351	0.654626	1.35485	1.1533
ENSGALG00000026738	3.01415	6.91081	4.073	5.54354	6.58937	5.58095	3.96293	4.89161	4.11851	4.62927	1.19811	1.78367	4.23521	1.56262	4.63793
ENSGALG00000015572	0.587433	1.69888	0.595345	0.716072	0.87143	2.01336	1.0727	0.476667	0.321065	1.09956	0.26269	0.60834	0.567468	0.491951	0.503597
ENSGALG00000028837	0	0	0	0	0	0	0	0	0	0	0	0	0	0	0
ENSGALG00000026350	2.48007	5.36816	5.02694	5.72811	9.20512	8.59036	2.75908	4.54086	3.04987	2.55459	4.09493	3.21748	4.12141	3.01273	2.56645
ENSGALG00000020298	0	0	0	0	0	0	0	0.0773041	0	0	0	0	0	0	0
ENSGALG00000010494	0.0340913	0.0319762	0.0276404	0.104986	0.0638816	0.0483494	0.0597631	0.110652	0.0279492	0.0883558	0.0609801	0.0302611	0	0.048943	0.0269778
ENSGALG00000026279	2.25611	4.11086	2.45892	3.53085	3.37861	4.0783	4.01987	2.58099	2.85026	2.38044	2.21626	2.36377	3.07914	2.33631	3.08778
ENSGALG00000028718	0	0.175489	0.0505644	0.288086	0.0584315	0	0.0546644	0	0	0	0.167333	0	0	0.134302	0
ENSGALG00000012115	0	0.252105	0.134105	0.286519	0.464909	0.190597	0.0362447	0.0894768	0.0508513	0.250065	0.0554742	0.0734102	0.152519	0.0593651	0.212697
ENSGALG00000003693	2.13948	4.41397	3.08548	6.03839	5.66136	7.38825	3.33566	3.03278	2.2106	2.44172	2.74777	2.26163	3.31107	3.0149	2.0493
ENSGALG00000014836	0.982358	2.09877	0.818596	1.72269	1.30389	2.59292	1.60251	0.974265	0.536914	0.589356	0.585724	0.823546	1.15027	1.03815	1.10129
ENSGALG00000022939	0	2.42444	0.986209	0.117059	0.142456	0.646915	0.133272	0.493509	0.249307	0.394067	0	0.809788	0	0.218286	0.240642
ENSGALG00000010408	0.0558792	0.0262062	0.0906109	0	0.0785314	0.0594372	0.048979	0.0302284	0	0	0	0	0.0883309	0.0200556	0.0221097
ENSGALG00000011805	0.0476338	3.21686	0	0.550089	0	0.371557	0.584525	0	0	0.082303	0.042602	0	0	0.102578	0
ENSGALG00000002701	7.63809	13.8676	7.85867	9.18177	8.24436	14.1267	21.2201	11.0668	10.7296	9.60856	9.9872	9.39677	9.60264	9.0418	9.9325
ENSGALG00000003533	25.7266	24.1305	31.7955	25.9637	21.1246	25.4858	19.5938	26.3747	24.8043	27.1368	31.8851	25.06	16.2466	26.1445	19.2148
ENSGALG00000016095	0	0	0	0.036811	0	0	0	0	0	0	0.0855256	0	0	0	0
ENSGALG00000009020	7.72521	7.14828	7.37766	12.5844	15.1001	17.9403	7.75685	5.49695	6.69189	7.46543	5.92214	7.6151	7.0439	7.78737	6.80534
ENSGALG00000004475	0.0869338	0.244621	0.246693	0.200787	0.0814499	0.0308231	0.0761988	0.0470278	0.0356356	0.187758	0.116626	0.11575	0.412261	0.062403	0.275177
ENSGALG00000025330	0	0	0.610278	1.7385	0	2.13503	0.659761	0	0	0	0	0	0.793229	0	0
Novel01242	0.514832	1.12675	1.1131	0.528483	0.803927	2.31215	0	0.185669	0.703462	0.741284	1.07438	0.913982	0.361698	0.61593	0.679013
ENSGALG00000014888	0	0	0	0	0	0	0	0	0	0	0	0	0	0	0
ENSGALG00000011550	275.203	160.02	252.964	128.87	133.12	96.4166	163.956	190.171	268.455	249.457	176.253	307.227	252.46	448.265	353.996
ENSGALG00000008109	0.0125992	0.0118175	0.0204302	0.116399	0.0590222	0.0714744	0.121477	0.0408941	0	0.0435385	0.0112683	0.0671021	0.119497	0.018088	0.00997026
ENSGALG00000028594	0.717204	0.672708	1.74447	1.10433	0.671962	1.52574	0.62864	0.775958	0	0.619602	0.641442	0	0.755813	0.514825	0
ENSGALG00000006787	6.42575	9.08136	8.55399	6.48471	6.58991	9.88291	7.61118	7.84467	8.36481	7.46424	6.95073	6.05067	7.04619	8.47711	7.62743
ENSGALG00000028183	0	0	0	0.0901841	0	0	0	0	0	0.202397	0	0	0	0	0
ENSGALG00000011219	0.476637	0.312946	0.811535	1.28435	2.14354	0.675982	0.41778	0.360979	0.273534	1.40003	0.554174	0.846173	0.703214	0.889565	1.05611
ENSGALG00000023359	0	0	0.0330676	0	0.114637	0.115686	0	0.0882528	0	0.0352349	0	0	0	0.0292765	0
ENSGALG00000007480	1.19358	0	0.493736	0.637617	0.31951	1.34731	0.234859	0.764273	2.05692	1.76768	0.980352	0.281086	0	0	0
ENSGALG00000010735	1.97878	3.98146	2.40652	3.66117	2.2726	5.72591	2.40583	2.17542	1.8316	1.26834	1.85539	2.03977	1.98441	1.90152	1.51538
ENSGALG00000015491	1.92106	1.7428	1.95332	3.44291	2.49327	2.46769	1.72525	2.36805	2.86589	2.40782	1.7463	1.9708	2.04107	2.22671	2.70398
ENSGALG00000001710	0	0.721774	0.0550503	0	0	0.288887	0.138866	0.0244869	0	0	0	0	0	0.0324927	0
ENSGALG00000016609	0.117185	1.01671	0.356289	0.42854	0.548963	1.95279	0.924428	0.348658	0.216162	0.278403	0.209612	0.364066	0.0926198	0.294412	0.510031
ENSGALG00000001787	0	0	0	0	0	0	0.020065	0	0	0	0	0	0	0	0
ENSGALG00000027279	0	0	0	0	0	0	0	0	0	0	0	0	0	0	0
ENSGALG00000016516	0.0396163	0.0743168	0.0642397	0.061	0.148469	0.22474	0.104173	0	0	0.102675	0.0708628	0.175827	0.0417489	0.11375	0.1254
ENSGALG00000023407	3.15536	4.20429	4.06457	5.2899	4.31015	4.78871	4.21321	4.40292	3.77152	3.31191	4.06164	4.1882	3.41845	2.83653	3.52375
ENSGALG00000001069	0	0	0	0	0	0.0409647	0	0	0	0	0	0	0	0	0
ENSGALG00000005502	0.23715	0.349544	0.109872	0.286909	0.317415	0.216215	0.623598	0.109962	0.305523	0.556095	0.0605997	0.0601447	0.464131	0.60797	0.375333
ENSGALG00000029044	0	0	0	0	0	0	0	0	0	0	0	0.37283	0	0	0
ENSGALG00000027774	1.56144	2.20472	1.933	1.75149	2.19441	3.18481	1.98671	2.06174	1.70683	1.24016	1.44905	1.78095	1.43317	1.54868	1.41499
ENSGALG00000003909	12.4597	16.6491	13.0239	20.2772	19.0731	19.8729	15.3232	16.0521	13.6094	11.4597	12.3436	9.90285	11.0296	13.2094	10.77
ENSGALG00000019215	0.763508	3.17147	1.5918	2.18331	1.22631	3.40319	2.5813	1.77012	2.59322	2.16727	1.95101	4.26	1.60922	2.19225	3.36623
ENSGALG00000024768	0	0	0.844357	0	0	0	0	0	0	0	0	0	0	0	0
ENSGALG00000005998	22.5636	36.924	28.6643	28.3275	22.4897	35.0157	31.1689	22.928	31.4586	22.574	23.7377	25.4466	28.2231	17.1566	23.8797
Novel01334	0.587811	0	0	1.96104	0.917886	0.277884	1.54568	0.211989	0.642544	0	0.175239	0.52177	3.09727	0	0.775265
ENSGALG00000014466	1.13992	2.22063	0.995309	3.44291	4.43634	3.10897	0.922296	3.51016	1.72531	1.66656	2.66639	1.08968	2.49497	2.39183	2.70618
ENSGALG00000008735	0.167576	0.497734	0.56611	0.107512	0.20934	0.118831	0.758895	1.02739	0.297666	1.66487	0.74937	2.57831	0.765253	0.501207	0.154711
ENSGALG00000027695	1.2618	2.54457	1.84147	24.9175	21.6344	13.4662	2.43318	4.30029	1.5517	2.4527	2.4263	2.35208	2.46	1.85679	3.24517
ENSGALG00000013925	0.303343	0.880668	0.257655	0.522684	0.676686	3.11391	0.784994	0.922068	0.3908	0.623958	0.426328	0.243618	0.745904	0.082951	0.754436
ENSGALG00000003355	15.9828	17.6289	18.8486	26.1254	16.9946	19.8089	12.448	15.7201	13.3722	16.8851	13.3303	17.8899	18.4238	16.755	20.1401
ENSGALG00000025528	0	0	0	0	0	0	0	0	0	0	0	0.717897	0	0	0
Novel01417	21.8813	26.0494	21.1525	29.3727	32.5914	25.2639	33.6868	27.6195	11.7294	17.9342	22.0789	18.6759	11.234	22.7549	28.6373
ENSGALG00000026753	1.13369	1.70136	1.49229	0.790662	0.874729	1.39976	0.946931	0.937956	1.54177	1.40573	1.336	1.38516	2.37537	1.56055	1.07656
ENSGALG00000005969	1.74879	4.05516	2.48128	6.20824	6.87247	12.2631	5.0243	5.04546	2.23022	4.0288	3.30189	3.23398	3.63466	2.99881	3.92101
ENSGALG00000003332	23.9292	45.0984	29.0416	25.174	29.2431	38.0476	29.1166	33.0454	15.9625	34.9896	30.3741	32.7847	35.9465	25.8721	22.2294
ENSGALG00000010517	3.75941	9.96905	4.10168	5.93156	6.47922	11.6837	4.10881	4.56953	3.57675	4.00963	3.81889	4.0786	6.06496	3.46485	3.63608
ENSGALG00000026306	11.4388	7.68793	15.3483	8.6205	8.18886	10.5106	9.19663	11.2864	12.5974	12.2135	8.89761	11.5837	10.4841	12.1286	11.6974
Novel00368	1.35651	0.525536	0.765096	3.24659	2.76292	2.50937	1.13731	0.92525	2.17588	2.19096	1.42421	3.50761	1.14984	1.22775	1.56352
ENSGALG00000028752	108.122	52.9622	95.5653	159.68	190.794	100.447	90.0439	139.828	82.3565	116.929	134.01	95.225	104.425	129.012	137.701
ENSGALG00000009958	0	0	0	0	0	0.0463738	0	0	0	0	0	0	0	0	0
ENSGALG00000014363	0	0.0297609	0	0	0	0	0	0	0	0	0	0	0	0	0
ENSGALG00000027505	0	0	0	0	0	0	0	0	0	0	0	0	0	0	0
ENSGALG00000008837	4.02491	8.75256	6.78182	11.6159	11.1024	11.1773	7.35143	5.57102	5.6225	4.29305	4.7058	3.73238	3.83875	9.03874	6.67264
ENSGALG00000004055	4.70362	13.4406	6.29684	11.2848	5.2268	13.3804	7.7662	6.44994	8.11593	6.94578	3.47302	7.37936	6.22485	4.63268	6.05933
Novel00694	0.12153	0.0126655	0.0218963	1.15396	0.885605	0.306413	0.082851	0.0584381	0.0996342	0.198317	0.0724613	0.107876	0.0996116	0.0484648	0.2992
Novel01351	1.7287	5.56453	3.12172	7.10823	6.66267	9.16602	4.02915	3.61312	1.51388	3.59785	2.84621	3.62696	4.4302	3.6663	3.45107
ENSGALG00000017436	72.4572	55.8069	79.4166	117.603	100.176	92.6453	59.5792	63.1882	74.4273	61.7731	60.3504	70.9928	72.2273	84.151	85.7839
ENSGALG00000011005	1.0936	3.3337	1.38911	0.44904	0.444001	2.75299	1.82126	1.10431	1.82303	1.92105	1.53233	1.1487	0.806732	2.05411	0.663482
ENSGALG00000005038	0	0.805339	0.159117	0.188866	0.0919367	1.00896	0.322536	0.132707	0.0603357	0.169546	0.0658208	0.0653265	0.206818	0.123266	0.13589
ENSGALG00000000621	23.7131	29.7223	28.5616	39.5828	55.1121	49.8772	27.6512	21.6989	21.4333	28.069	22.6643	20.6301	25.2383	16.3951	25.0762
ENSGALG00000013529	0.0966551	0.0989001	0.135359	0.142062	0.123488	0.180695	0.115527	0.0950665	0.028815	0.0379553	0.102162	0.0467977	0.0185197	0.0567664	0.0278135
ENSGALG00000004842	22.5134	24.1771	11.1107	20.5146	18.9534	26.762	17.6361	22.122	19.1706	14.9396	11.1862	21.1425	24.4131	17.644	15.6641
ENSGALG00000013454	2.68894	2.06355	3.50141	5.14407	5.03863	6.47146	1.14274	2.20395	2.5385	4.64602	2.18627	3.3271	2.66195	1.46226	1.41858
ENSGALG00000008005	1.33815	2.64754	1.64436	3.15506	2.80132	2.57983	2.27251	2.17166	1.69702	1.77019	1.32769	1.26205	2.82037	1.92111	2.21714
ENSGALG00000011657	1.44292	8.24725	3.50964	2.91606	1.30965	7.51409	2.96423	1.17084	1.44172	2.18147	1.93574	2.40151	7.17529	1.52127	2.60482
ENSGALG00000021872	0	0	0	0	0.118319	0.179102	0	0	0	0	0	0	0	0	0.0999344
ENSGALG00000017873	1.58382	3.71391	5.77857	7.92587	5.1937	3.36935	2.08237	3.42715	2.59695	2.73657	1.41652	7.02941	2.50363	6.25297	5.64005
Novel00787	0	0.112383	0.0971443	0.461225	0.0561292	0	0.105021	0.0648161	0.245574	0.0517555	0	0.265888	0	0	0
ENSGALG00000028318	11.4563	31.8596	34.3837	10.8703	4.61358	14.2167	66.724	44.904	39.7112	19.6643	28.761	43.5758	13.1321	7.79076	19.1655
ENSGALG00000015230	3.95537	6.47674	7.01173	4.85165	4.83647	6.75058	4.81847	7.90601	6.15573	8.5717	5.99584	5.35574	5.01609	6.88158	6.94976
ENSGALG00000016027	9.49272	20.0335	14.0659	17.2627	18.5545	16.5385	12.3373	12.6609	11.875	10.8167	14.4915	11.9129	16.213	16.6828	13.9878
ENSGALG00000007262	13.0017	25.6321	15.2753	14.8757	15.3397	25.5676	19.8378	19.7977	14.459	15.2364	13.9431	13.9987	15.9217	15.1227	16.0047
ENSGALG00000016392	262.037	323.172	266.046	315.918	344.268	350.575	253.564	309.517	257.129	316.981	221.591	285.716	235.603	239.38	333.903
ENSGALG00000008037	0.260355	0.162801	0.140726	0.133629	0	0.0615406	0.0760684	0.0938945	0.0711492	0	0	0.154069	0	0	0.206029
ENSGALG00000023023	8.77447	11.0553	11.6268	16.4346	12.5155	13.5587	10.159	6.65947	9.98516	10.1826	8.84317	10.8692	10.1439	8.88372	12.0217
ENSGALG00000027240	6.26418	15.2424	12.9842	10.3863	10.6833	25.7381	13.1776	9.4883	8.76772	10.243	7.58363	9.15452	8.11303	11.5347	9.51189
ENSGALG00000012631	11.2411	10.1689	13.7357	13.9659	8.2858	15.3569	9.923	7.55077	10.0675	6.69665	6.19416	7.16438	8.19689	9.637	6.93511
ENSGALG00000012554	2.40997	2.50705	2.23815	1.14698	1.97057	3.13825	1.88194	4.02962	1.76024	2.04415	3.5662	2.02252	1.66235	1.06941	2.08048
ENSGALG00000000377	41.3847	51.9131	41.5923	44.7607	40.6849	57.8254	46.4774	38.7665	43.4975	39.2223	38.6967	40.3836	41.8932	42.2517	39.7263
ENSGALG00000007650	7.94716	47.446	14.114	12.7871	9.849	31.8448	15.5164	9.64454	6.17062	15.5476	9.51449	15.5269	8.59653	7.12326	8.41848
ENSGALG00000007638	7.99423	15.1435	8.95976	13.9385	16.3751	14.8946	8.86188	9.92107	7.64627	7.10945	7.43015	8.48747	9.49831	8.43888	6.94637
ENSGALG00000015598	0.594864	0.394862	0.437781	1.04278	1.40621	1.02537	0.641732	0.60399	0.330128	0.442754	0.27829	0.349313	0.424354	0.374452	0.50695
ENSGALG00000003634	58.7208	63.8973	74.5776	48.1877	48.2145	71.1915	70.8409	75.8846	89.1768	65.512	50.9732	56.4387	59.4551	45.6177	63.7039
ENSGALG00000003995	11.2318	10.3173	12.1169	10.7554	9.78406	10.3672	10.1296	12.5537	13.8884	10.9463	11.0001	12.5242	9.92892	9.16187	10.7613
ENSGALG00000016443	4.96596	17.4197	7.98709	13.5212	12.5963	21.9875	12.8105	6.68321	4.56776	6.90611	5.41632	4.62306	6.29697	3.56468	5.17579
ENSGALG00000009252	4.1686	8.86564	4.99109	11.4641	12.607	18.348	7.66457	3.83883	3.75137	4.20432	3.80628	3.43349	4.80166	2.99231	4.158
ENSGALG00000007447	2.61725	3.1728	3.98375	3.23157	2.26708	2.66134	2.38063	4.59476	2.38862	3.34895	1.54579	2.95879	3.01834	2.44588	2.77454
ENSGALG00000023308	78.1957	92.8843	95.579	55.413	63.8276	56.36	85.9343	101.8	85.2338	102.781	99.3402	100.084	99.677	84.8337	76.5679
ENSGALG00000015886	0	0	0	0	0	0.0250277	0	0	0	0	0	0	0	0	0
ENSGALG00000011560	0.20219	0.16594	0.45081	0.544822	0.378872	0.161299	0.398752	0.0820328	0.207203	0.109172	0.11302	0.269211	0.266344	0.163279	0.320003
ENSGALG00000016097	19.4822	15.9677	18.3868	25.929	27.4087	22.4877	15.7836	20.6128	15.4179	17.8397	14.456	22.2032	27.3962	21.6609	20.9127
ENSGALG00000002005	10.3767	23.0211	11.0581	11.2658	7.88834	22.3613	22.575	14.8234	11.8439	16.7214	25.869	22.4757	31.6929	17.4843	14.2104
ENSGALG00000001256	4.86965	6.44302	5.10617	6.64989	5.88787	6.60727	6.64093	6.12214	6.12227	4.25396	6.90999	6.74944	5.43282	6.60051	4.7362
Novel01488	37.3232	49.2173	46.1169	52.8038	69.5505	63.0898	38.9916	49.0231	34.8894	38.9069	37.4453	36.5529	36.2845	43.7955	44.1395
ENSGALG00000008272	6.03734	41.8386	13.164	16.1103	17.1892	36.9511	20.859	9.57593	6.58347	12.3051	7.28682	8.6369	14.0836	4.92279	6.58658
Novel01195	0	0.588342	1.11884	57.4671	126.706	146.872	0.659761	1.08583	0.822795	0.650275	0.448798	0	0.661024	2.70155	0.297824
ENSGALG00000018335	0	0	0	0	0	0	0	0.761589	0	0	0	0	0	1.01058	0
ENSGALG00000000606	41.3306	43.195	38.7804	58.5295	53.1485	52.4539	46.843	39.9783	47.4603	34.5828	41.6158	41.7285	44.6372	44.7967	38.5006
Novel00072	0	0.375909	0.199961	0.379753	0.202188	0.808862	0.837677	0.767148	0.202195	0.532667	0.0275721	0.0547302	0.747231	0.199166	0.317148
ENSGALG00000009534	8.0216	10.8679	8.18986	11.9194	11.4744	17.7202	11.1397	9.46447	7.41534	8.0707	6.05234	7.79431	8.45342	6.63482	7.44496
ENSGALG00000028758	0	0	0	0	0	0	0	0	0	0	0	0	0	0	0
Novel01459	0	0	0	0	0	0	0	0	0	0	0	0	0	0	0
Novel00824	3.81389	3.33879	4.32909	2.15326	2.14399	2.46409	4.1601	5.77687	4.86385	4.5396	7.58003	5.71757	4.64441	5.77958	6.77393
ENSGALG00000003901	1.70549	13.1368	2.09511	2.78522	4.35793	9.19871	5.52656	3.01943	1.05926	2.99144	1.664	2.29376	2.77765	1.52102	2.24937
ENSGALG00000026942	28.4857	35.9137	32.0938	35.1747	38.4735	39.0877	32.2641	40.0251	29.4194	35.6354	29.9433	27.9124	25.9257	28.2815	31.6172
ENSGALG00000024697	0	0	0	1.31527	0	0	0	0	0	0	0	0	0	0.613162	0
ENSGALG00000012419	0	0.159523	0	0	0.0796733	0	0.22361	0	0	0	0	0	0.179231	0.0610418	0
ENSGALG00000026479	0	0	0	0.0513417	0.124961	0.0472891	0.0584525	0	0	0	0	0.059195	0	0	0.105545
ENSGALG00000028338	0	0.148247	0.128146	0	0	0.112078	0	0	0.129577	0.136544	0.282715	0	0.166562	0	0
ENSGALG00000013255	134.247	102.059	130.194	97.2824	105.809	86.5019	134.136	134.713	159.998	128.692	188.299	161.776	105.902	132.202	138.337
ENSGALG00000010537	13.2821	16.932	12.9107	14.9149	17.532	16.5996	19.2318	19.5308	25.0871	22.6956	15.8169	15.633	24.3596	23.1244	19.9761
ENSGALG00000026980	0.357478	0.894132	0.579668	4.49521	4.80063	2.61943	1.67112	1.54705	1.17229	0.823546	1.38543	0.951945	0.62787	1.53963	1.50873
ENSGALG00000013346	0	0	0	0	0	0	0	0	0	0	0	0	0	0	0
ENSGALG00000025388	0.883995	0	0.716721	0	2.4847	2.50742	0	0.956414	0	0.763695	0	0	0	0.634551	0
ENSGALG00000026200	266.359	174.78	250.158	265.929	255.33	279.592	155.422	126.082	209.904	30.2752	63.4575	64.7916	42.9466	56.9812	35.6457
ENSGALG00000028648	4.753	4.11518	5.45434	4.57877	3.9736	4.89144	3.76015	4.45672	4.77592	3.34811	4.03292	4.75989	4.70063	4.11166	3.18259
Novel01411	75.3854	58.6618	63.1903	50.1155	52.767	54.9844	65.3074	66.5435	78.0883	57.201	68.2069	54.0991	70.7006	79.3089	63.7588
ENSGALG00000006449	0.392549	0.22793	0.333424	1.22326	0.858168	0.424172	0.442382	0.707845	0.137925	1.16272	1.88915	1.59289	2.36389	0.912431	2.57387
ENSGALG00000024094	10.8867	20.165	14.6678	17.3088	16.7356	21.1811	15.3559	13.7333	11.4003	12.2109	13.5004	11.4298	14.6542	12.5101	10.8593
ENSGALG00000025585	0	0	0	1.32021	0.535549	0	0	0	0.468622	0.493818	0	0	0.602377	0	1.357
ENSGALG00000014729	0.0324056	0.44073	0.0656842	0.0249486	0.0759036	0.574484	0.21303	0.140241	0.0132836	0.0699891	0.11593	0	0	0	0.0384658
ENSGALG00000001945	4.13251	3.83026	4.04444	4.17933	2.72632	4.0055	2.20762	3.7832	2.10496	2.28151	2.3838	2.14884	3.5046	2.70312	2.41881
ENSGALG00000004978	158.942	117.113	138.686	38.7661	45.6694	48.0753	163.085	137.575	168.082	151.031	168.769	156.609	172.1	172.095	159.44
ENSGALG00000011186	0.791725	1.09703	0.948278	0.942013	0.724924	0.956975	0.835906	0.973391	0.722843	0.730617	0.885114	1.11805	0.701609	0.942891	0.968264
ENSGALG00000012466	354.075	268.285	318.925	505.568	672.681	335.893	306.817	236.888	292.727	315.89	279.343	324.024	318.894	277.704	378.449
ENSGALG00000005294	3.14755	4.6665	3.51923	4.29933	4.28081	7.00194	5.7625	8.01918	3.51693	3.61831	4.49502	3.94304	3.638	3.46196	2.69166
ENSGALG00000016965	24.991	22.1734	25.3732	19.0091	17.016	18.3601	21.5761	30.3673	27.6871	31.1856	24.0291	29.3112	37.5668	22.9491	39.1964
ENSGALG00000017832	0	0	0	0	0	0	0	0	0	0	0	0	1.06822	0	0
ENSGALG00000002560	0	0	0	0	0	0	0	0	0	0	0	0	0	0	0
ENSGALG00000017952	0	0	0	0	0	0	0	0	0	0	0	0	0	0	0
ENSGALG00000005128	0.788329	0.322656	0.604294	1.1366	1.14147	0.945247	0.351773	0.558269	0.693303	0.482925	0.525586	0.750652	0.906291	1.11118	1.25902
ENSGALG00000028349	0	0	0	0.0784578	0	0.0722648	0	0	0.0835479	0	0	0	0	0.146304	0
ENSGALG00000027723	3.56448	4.55622	3.58286	4.97773	4.16137	5.52571	3.50871	3.22388	3.16197	2.81712	3.15778	2.74481	4.24221	3.74518	3.02538
ENSGALG00000024470	228.62	315.899	298.907	375.999	400.25	325.406	258.114	345.159	251.034	327.677	234.616	274.401	409.847	244.519	402.931
ENSGALG00000016111	0	0	0	0.00853884	0.00519571	0.00393242	0	0	0	0	0	0.00984497	0	0	0
ENSGALG00000007403	308.812	280.406	332.806	191.979	203.144	150.878	272.057	310.226	284.958	364.441	318.923	386.319	385.22	257.315	368.956
ENSGALG00000026392	0	1.21581	0.0525473	3.79219	1.03229	0	0.0568081	0.350603	0	0.0559913	0.0579649	0.172589	0	0	0.205151
ENSGALG00000004493	17.2266	26.0574	27.0486	34.6507	32.924	38.0234	26.4062	21.1317	18.6317	16.3496	18.3364	18.6653	23.5661	17.7067	23.0722
ENSGALG00000000511	150.116	170.061	152.363	78.3097	46.7176	75.49	141.274	232.761	161.167	31.6507	90.0814	105.198	29.9125	106.244	53.6304
ENSGALG00000001261	0	0	0	0	0	0	0	0	0	0	0	0	0	0	0
ENSGALG00000011844	0	0.325603	0	0	0.487863	0	0.152137	0.375578	0.142299	0.149949	0.155235	0	0	0.124592	0
ENSGALG00000014268	0	0.376887	0.0325782	0.0309353	0.0376469	0	0.316978	0.0869467	0	0	0.035937	0.0356672	0.0423447	0	0
ENSGALG00000007808	6.23196	6.17338	7.11506	5.72811	7.23898	8.31979	6.32637	7.3961	7.66377	5.7135	5.43147	8.35415	6.56745	8.87841	9.51095
ENSGALG00000002480	176.124	99.4351	157.281	102.534	103.187	83.874	161.264	149.589	180.385	116.528	154.895	139.475	121.253	159.101	132.034
ENSGALG00000025598	0	1.06428	0.919971	6.11502	4.25242	4.0231	1.98913	0	0	0	0	1.0072	0	0	0
ENSGALG00000028435	0	0	0	0	0	0	0	0	0	0	0	0	0	0	0
ENSGALG00000001223	36.362	22.531	41.199	19.7639	23.3098	22.7899	32.3924	48.5513	37.1688	42.3599	29.6288	46.5698	40.7535	44.2445	44.4937
ENSGALG00000028000	0	0	0	0	0	0	0	0	0	0	0	0	0	0	0
ENSGALG00000011100	55.2808	61.3681	54.7488	43.4835	64.9528	42.2487	65.4968	49.8593	61.2204	50.0896	48.1448	67.6154	107.032	44.6689	60.0814
ENSGALG00000027371	0	0	0	0	0	0	0	0	0	0	0	0	0	0	0
ENSGALG00000026895	12.3933	13.1313	16.5143	18.7736	15.3745	17.6172	11.6676	11.6704	9.59597	11.8468	11.8538	9.77857	10.4604	13.1383	9.39866
Novel00988	0.430217	0.728951	0.337558	2.32921	1.87237	2.38155	1.72733	0.405402	0.443728	0.299734	0.595775	0.431158	0.614253	0.577791	0.439288
ENSGALG00000010233	0	0.098219	0.169802	5.40148	0.0981101	1.18809	0.55071	0.566471	0.257549	0.0904653	0.280962	0	0.441411	0.300669	0.331463
ENSGALG00000023297	0	0.337948	0.292123	0.138696	0	0	0	0.194909	0	0	0.16112	0.159911	0.189849	0.258632	0
ENSGALG00000017289	3.50384	3.67842	3.96151	1.90561	2.65034	3.0545	2.73306	3.89521	3.16246	2.61045	3.16246	5.56408	4.09897	4.59184	3.51042
ENSGALG00000025438	0.950295	2.67401	1.54095	5.12133	8.01314	8.08643	1.6659	10.2814	5.45359	9.0307	2.54973	3.37412	12.0174	6.82143	6.76806
ENSGALG00000029132	0	0	0	0	0	0	0	0	0	0	0	0	0	0	0
ENSGALG00000015634	0.0375055	0.175893	0.21286	0.259874	0.421675	0.132979	0.361616	0.121734	0.0307483	0.22681	0.134174	0	0.079049	0.107689	0
ENSGALG00000000843	9.13915	8.13844	9.58201	16.0721	12.9586	14.5623	12.6119	9.29928	11.3727	10.8797	12.0538	14.7882	8.61356	14.0578	11.72
ENSGALG00000026827	0	0	0	0	0	0	0	0	0	0	0	0	0	0	0
ENSGALG00000025883	0	0.138595	0	0.11376	0.0692206	0.419122	0	0	0.0605702	0.0638268	0.132153	0	0	0.0530334	0
ENSGALG00000021301	3.2858	5.36175	3.46691	3.98513	4.97626	6.95813	3.94529	5.06463	1.99268	3.7719	3.62306	3.91549	3.22552	3.87719	2.45771
ENSGALG00000028994	53.2151	35.3434	57.8277	36.474	35.291	33.8643	35.1494	33.0955	39.89	34.4495	32.1906	37.9315	29.8786	62.5405	39.4946
ENSGALG00000004495	0.0403737	0.0757377	0.032734	0.341914	0.0378268	0.143148	0	0	0.0330997	0.0697587	0.0361088	0.0358377	0.127641	0	0.0638986
ENSGALG00000021836	0	0	0	0	0	0	0	0	0	0	0	0	0	0	0
ENSGALG00000003923	11.3963	68.322	25.1639	32.7737	39.1317	102.312	59.7153	24.6353	15.7851	19.4094	23.2991	15.4497	37.4748	8.15335	19.7217
ENSGALG00000013145	0.0616491	0.0289122	0.108298	0.102836	0.1444	0.0510024	0.0450303	0.0555829	0.0673894	0.0976423	0.0551368	0.0729637	0.0649678	0.0663796	0.0569163
ENSGALG00000014786	0.847304	2.63085	1.8951	2.33938	1.56034	3.06634	3.14997	2.49726	1.7486	2.37268	2.9528	2.69722	1.41635	3.7122	6.05767
ENSGALG00000004360	0.412723	0.193559	0	0.158875	0.464026	0.321936	0	0.0446534	0.0338365	0.24959	0.073825	0.219812	0	0	0.0653209
ENSGALG00000022679	304.426	246.616	376.423	257.888	309.95	232.706	0	0	0	316.487	241.835	376.015	341.281	305.385	324.709
ENSGALG00000003446	0.0263696	0.173135	0.0427597	0.0609048	0.0494124	0.186991	0.254247	0.0855896	0	0.113905	0.141504	0	0.194524	0.0757148	0.125204
ENSGALG00000001409	0	0.0343648	0	0	0	0.0779415	0.096341	0	0	0	0	0	0.0386102	0	0
ENSGALG00000000162	0.136979	0.642405	0.166589	2.90011	0.320847	6.02233	4.98268	1.03741	16.2274	0.532523	19.1728	0.790333	54.7821	0.835778	75.7697
Novel00014	0	0.556542	0.120269	1.19914	0.138981	1.42006	0.325053	0.160491	0	0.320379	0.464341	0.197509	0.0781621	0.266202	0.17608
ENSGALG00000007728	3.23177	19.5156	5.09075	14.8101	21.3684	36.9946	8.65997	3.52982	2.54858	3.90876	2.89038	2.59547	6.51957	4.97108	2.21644
ENSGALG00000007478	0.236649	0.332951	0.431706	1.3209	0.776024	0.545389	0.207427	0.256036	0.194013	0.255556	0.317476	0.367608	0.498778	0.339744	0.234088
ENSGALG00000026735	0.323046	0.404006	0.261918	0.248709	0.403558	0	0.0943851	0.349511	0.0882815	0.837252	0.481536	3.24986	3.06393	0.23189	0.25564
ENSGALG00000028849	9.80768	11.8904	10.5213	15.8668	11.5961	16.1303	8.81027	8.80542	8.97849	7.32273	7.8492	7.75697	7.41084	10.6747	9.0226
ENSGALG00000002756	0	0.379696	0	0.186995	0.15171	0.287058	0.141929	0	0	0	0	0	0	0.0581165	0
ENSGALG00000022942	0	0	0	0	0	0	0	0	0	0	0	0	0	0	0
ENSGALG00000029029	0	0	0	0	0	0	0	0	0	0	0	0	0	0	0
ENSGALG00000004138	0	0.0155522	0	0	0	0	0.0145335	0	0	0	0	0	0	0	0
ENSGALG00000009509	0.398261	0.249035	0.932822	1.19239	0.746277	0.784481	0.543016	1.34054	0.580459	0.611667	0.593651	1.09983	1.49227	0.730583	0.94548
ENSGALG00000019428	0	0	0	0	0	0	0	0	0	0	0	0	0	0	0
ENSGALG00000007509	8.31908	10.579	9.18345	11.5409	11.8863	14.5551	10.1384	9.12175	11.0698	11.4439	11.5181	13.7322	13.4033	12.2533	10.7231
ENSGALG00000005947	5.0462	12.5509	6.10878	12.0837	8.51018	15.3005	9.56299	4.48063	4.12278	3.89346	3.67277	3.56796	4.60269	2.98525	3.89687
ENSGALG00000020326	3.37729	24.7603	4.6941	11.4087	6.52223	19.9412	8.75993	5.44367	2.65581	6.25219	3.51368	4.40501	5.73815	2.72115	4.4725
ENSGALG00000029004	0.326749	3.77988	10.4643	7.63064	15.1538	5.32917	6.30081	7.36493	6.25053	0.611613	14.9039	9.61961	16.2413	5.55096	0.430949
ENSGALG00000002696	368.99	464.979	356.437	433.154	536.789	493.742	618.923	810.729	692.605	459.238	324.564	406.558	356.017	386.793	436.882
ENSGALG00000008427	0	0	0	0.140023	0.340804	0	0	0.0655914	0	0	0	0	0	0	0.0479749
ENSGALG00000025615	0.539174	1.01145	0	0.830206	0.505163	0.382337	1.41778	0	0	0.4658	0.482219	0	0.5682	0.387031	0.42667
ENSGALG00000009501	9.95899	20.4395	24.1436	20.269	19.6778	15.8722	15.557	20.0562	21.3415	19.2519	18.5195	20.2184	25.0428	22.6496	16.8543
ENSGALG00000014405	0.0549502	0.103082	0.178209	0.338443	0.12871	0.409144	0.120412	0.14863	0.0675751	0.0474722	0.0491455	0.0731648	0.0868625	0.216945	0
ENSGALG00000010793	0.222088	0.781161	0.146302	0.309906	0.0910344	0.767746	0.644824	0.270317	0.0910378	0.191865	0.186214	0.271063	0.102394	0.039855	0.0988579
ENSGALG00000011270	0	0	0	0.0484716	0	0	0.0275925	0	0	0	0	0.027943	0.0331744	0	0
ENSGALG00000022557	0.58933	0.33166	0.477814	0.453717	0.331293	0.167161	1.13643	1.27522	0.676414	0.203652	0.843322	0.941614	0.124211	0	0.652905
ENSGALG00000027796	21.8459	39.3418	22.6715	16.8188	21.2865	27.8843	38.2965	23.6355	25.7904	17.3631	25.0089	16.2888	23.0219	23.2085	26.9685
ENSGALG00000015211	35.8611	30.7451	34.0548	38.2346	30.5601	29.9969	22.38	26.3802	34.9256	30.6828	35.3028	54.4555	28.7739	49.3042	29.0518
ENSGALG00000021902	0	0	0	0	0	0	0	0	0	0	0	0	0	0	0
ENSGALG00000001003	8.33627	13.169	8.66684	12.7438	11.2859	16.2351	9.68423	8.02665	6.37656	8.40786	7.06327	8.21401	8.78503	8.38899	8.0172
ENSGALG00000004401	0	2.53375	0.104294	0.0495173	0.0602605	0.0912175	0.225502	0.278347	0.0527299	0.055565	0	0.0570916	0	0.0461687	0.152692
ENSGALG00000026174	0	0	0	0	0	0	0	0	0	0	0	0	0	0	0
ENSGALG00000002287	0	0.0168455	0.0728066	0.0276539	0	0.0509422	0.094452	0.0777241	0	0.0620626	0.0803128	0.0318839	0.151413	0.0386757	0.0568491
ENSGALG00000010121	0	0	0	0	0	0	0	0	0	0	0	0	0	0	0
ENSGALG00000009476	3.8748	9.52214	4.90088	7.63688	6.17164	13.4637	6.65679	4.10839	2.92256	5.08819	3.74273	5.57193	5.30841	3.56021	4.78341
ENSGALG00000008298	0.0438429	4.27677	1.0664	0.607573	0.698313	3.10897	0.999154	1.18586	0.215663	0.340888	0.274481	0.583757	1.20128	0.377657	0.936756
ENSGALG00000025919	0.167823	0.708348	0.10205	0.387613	0.373436	0.83304	0.367748	0.181571	0.171983	0.235599	0.187618	0.20483	0.176857	0.1807	0.215808
ENSGALG00000028583	0	0.599218	0.517967	3.93476	0	1.35906	1.11993	0.69119	0	0.551914	0	0.567078	1.34649	1.37575	1.51665
ENSGALG00000015965	3.31864	5.17265	3.71945	3.71974	3.55511	5.47661	5.09046	3.66971	3.741	2.46647	3.91742	3.21654	3.13727	3.54701	3.01237
ENSGALG00000016897	2.58981	3.26497	2.55132	3.3231	2.47863	4.7788	2.34324	2.68146	1.87209	1.85245	1.96756	2.15054	2.05426	1.03946	1.47647
ENSGALG00000006975	4.38567	6.22956	4.82207	5.10114	4.53766	6.11922	5.0333	5.08632	5.83303	4.90641	4.45855	5.22326	5.9684	5.34503	6.19208
ENSGALG00000027094	0	0	0	0	0	0	0	0	0	0	0	0	0	0	0
ENSGALG00000007152	0	0	0	0	0	0.1793	0	0	0	0.0728135	0	0	0	0	0
ENSGALG00000013813	0	0	0	0	0	0	0	0	0	0	0	0	0	0	0
ENSGALG00000026228	0	0	0	0	0	0	0	0	0	0	0	0	0	0	0
ENSGALG00000017168	1060.03	488.781	1041.67	591.063	636.564	369.093	645.367	1068.87	948.696	1845.13	1233.43	1593.19	1567.12	1707.67	1623.65
ENSGALG00000006234	11.9607	26.816	12.2116	22.2207	27.5206	46.9262	15.3522	14.489	7.62671	13.5124	14.5677	8.49957	11.5991	9.85759	7.14592
ENSGALG00000025715	0.39699	0	0.482804	0	0	0.70378	0.695936	0	0	0	0	0	0	0	0
ENSGALG00000028258	30.3559	38.4505	40.5591	28.1122	17.8127	42.5338	37.5107	76.352	43.1278	41.4718	33.6154	50.1526	34.7606	42.8988	21.8258
ENSGALG00000015363	0	1.25572	0.155064	0.196325	0.0895949	1.35622	0.391154	0.172435	0.104531	0.275379	0.114034	0.0565889	0.0671834	0.0457622	0.27747
ENSGALG00000025386	0	0	0	0	0	0	0	0	0	0	0	0	0	0	0
ENSGALG00000012538	2.30986	2.3769	2.80008	2.76245	4.58044	1.63796	14.6049	1.60136	0.864117	0.852455	2.68762	1.53278	0.519928	1.17514	0.90507
ENSGALG00000010708	0.934716	2.37446	1.73673	3.47819	4.12334	4.44643	1.36549	1.22198	1.08561	0.504696	1.1843	0.449421	0.820862	1.11827	0.616399
ENSGALG00000028250	0.0278526	0.0783737	0	0	0	0.0493768	0	0	0.0228345	0	0	0	0.014676	0	0
ENSGALG00000003719	5.03715	5.21071	5.50415	4.83557	4.61258	6.70287	5.2055	4.33965	5.04732	3.6622	4.1528	4.20442	4.21606	5.45342	4.98672
ENSGALG00000025538	0	0	0	0	0	0	0	0	0	0	0	0	0	0	0
ENSGALG00000027354	2.87435	2.69602	2.71093	1.80647	2.36327	1.91346	2.00525	2.53863	2.21221	2.28048	5.87593	2.55141	1.48363	4.37919	4.27065
ENSGALG00000005867	3.58897	7.98831	4.06455	4.38587	2.24172	6.68567	4.64379	2.77356	1.96158	2.33773	1.7323	2.04798	2.13123	3.63946	2.05118
ENSGALG00000026199	0	0	0	0.208105	0.0633137	0	0	0.146225	0.0554016	0	0	0	0	0.0485079	0
ENSGALG00000011990	5.72794	5.42815	9.06395	12.226	9.71543	12.6195	9.55651	5.44925	6.86582	3.99288	5.54683	5.31233	4.51681	5.40185	5.54871
ENSGALG00000000067	4.08334	9.94081	4.79862	8.01822	8.12437	7.87333	7.31909	7.19763	6.16873	4.32039	5.86782	4.96852	6.38222	2.93111	4.97405
ENSGALG00000015422	0.189664	0.0889484	0	0.584078	0.947732	0.448312	0.49873	0.581404	0.0777465	0	0.0848144	0.280592	0.233186	0.136145	0.150089
ENSGALG00000005211	9.8095	9.83545	11.6557	12.5653	11.6865	11.4535	13.6014	11.1621	14.1084	13.4059	10.891	10.5465	13.4567	13.4152	13.8858
ENSGALG00000017019	1.96969	7.50914	2.98789	3.05733	3.33369	7.36666	3.39723	1.61547	1.77109	2.52501	2.07417	2.36879	3.31446	2.9646	2.5643
ENSGALG00000025688	0	0	0	0	0	0	0	0	0	0	0	0	0	0	0
ENSGALG00000027638	2.26914	0.625988	1.20246	577.553	127.532	39.3542	4.02987	5.26307	3.53825	15.1958	0.119379	2.2775	102.857	0.021292	8.9431
ENSGALG00000001996	1.08044	1.28979	1.1149	1.20991	1.65646	2.50742	1.29139	1.38149	0.966306	1.44254	1.84477	1.04624	0.517546	1.2691	0.854995
ENSGALG00000005139	11.7626	30.6711	16.0416	22.9834	24.0417	35.6675	21.176	13.2023	14.9054	9.5135	12.2098	9.53367	13.0368	10.1247	10.0762
ENSGALG00000003851	6.65114	7.42346	6.8085	9.12557	9.74772	8.56335	7.71882	7.27641	7.15874	7.73624	7.31106	6.69546	6.50014	5.92124	5.05748
ENSGALG00000006346	1.05287	15.5975	13.5579	5.31653	4.323	38.3845	32.4358	9.71607	2.97036	9.5507	4.70826	9.48326	2.48017	1.31149	1.29878
ENSGALG00000006153	7.25706	9.16726	6.7854	6.66849	4.77046	8.09266	6.61742	10.6376	9.11631	9.85925	7.95605	9.4548	7.77108	8.48609	8.19739
ENSGALG00000008614	98.6919	67.336	98.4981	21.305	24.2067	28.9181	56.7566	121.732	108.506	84.2076	77.3586	90.0677	80.7957	96.7754	85.2764
Novel01268	0.26215	0.491772	1.41697	136.098	257.403	300.778	1.45527	2.07992	1.791	2.26475	0.390763	0.0775659	0.7367	4.95533	0.4149
ENSGALG00000000507	0.0402241	0.150914	0.0326127	0.123872	0.11306	0.199665	0.0352571	0.130558	0	0.0347502	0.1439	0.14282	0	0.115495	0
ENSGALG00000017524	80.9238	76.5598	86.8949	45.9182	45.1897	54.3067	66.6972	73.9204	63.7615	72.3302	88.4658	75.0632	84.1736	80.5506	86.0307
ENSGALG00000001962	8.58005	21.7557	11.9723	21.0888	18.0518	32.3936	16.9175	9.90302	7.31061	9.30557	7.67369	8.88791	10.6229	7.41736	9.27086
ENSGALG00000003285	0.0183322	0.0687794	0.0148633	0.0282274	0.0343516	0.103997	0	0.019834	0.0450881	0.0633497	0.147561	0.0976354	0.0579572	0.052637	0.043521
Novel01152	0.649774	4.26623	0.0878035	2.58464	0.608786	0	4.46138	1.28884	0	1.40337	0.290568	0.576772	0	0	0.342795
ENSGALG00000009800	126.588	81.1548	107.376	55.3884	57.492	61.8755	102.111	94.4642	111.341	112.134	112.705	125.452	72.8641	109.67	117.265
ENSGALG00000028448	1.05171	3.94584	1.21814	1.04104	0.563067	3.08968	1.71199	0.325105	0.862228	3.76414	1.20936	1.60037	1.42499	0.539243	1.66452
ENSGALG00000003299	6.16172	8.56175	6.62271	8.54727	7.78593	9.44249	7.05455	6.5839	6.15131	5.65294	5.8522	6.07931	7.6312	7.08465	5.54916
ENSGALG00000001233	4.97211	5.87618	10.4813	2.87097	2.88825	4.08993	8.23687	4.62631	9.00864	7.94663	9.11611	15.0941	8.01685	5.53209	7.20038
Novel01431	40.5534	36.5541	43.4122	40.3532	42.7579	41.4935	32.1793	43.0201	48.8982	40.4997	50.8178	35.1951	40.2366	48.0845	47.7351
ENSGALG00000015433	2.97025	12.2124	2.86568	3.508	4.42868	10.1538	10.6192	3.59368	3.40393	1.38879	2.98974	1.88055	1.39118	2.04041	1.33952
ENSGALG00000019286	9.47007	12.9948	10.2375	11.7464	10.2693	11.2545	12.2973	12.6176	16.6061	13.8628	15.2141	11.6751	12.1052	15.5469	12.0044
Novel01104	1.68509	2.85714	2.10189	12.1749	2.1253	4.77971	0	0	0	4.4793	11.7669	3.79696	3.21011	2.37267	1.6925
ENSGALG00000003636	0.939852	1.56719	1.52402	0.602982	0.831645	2.70288	1.23569	2.14668	1.2842	2.43585	1.21416	1.94661	3.13642	1.27433	0.909019
ENSGALG00000020984	0	0	0	0	0.148392	0	0	0	0	0	0	0	0	0	0.125334
ENSGALG00000002967	13.678	14.3202	12.4633	7.43896	6.89745	7.38568	13.6938	13.124	11.7281	7.89579	8.1367	6.59043	11.9678	8.227	11.337
ENSGALG00000013408	12.9226	16.9564	13.8212	7.83216	9.2738	14.4279	12.07	12.9897	13.8629	10.0951	11.2707	12.3046	13.3285	15.7727	14.3602
ENSGALG00000006845	0.508732	0.835046	0.515584	0.905726	0.714961	1.24008	1.282	0.653609	0.234605	0.576844	0.369681	0.536246	0.938207	0.43365	0.629031
ENSGALG00000028996	11.2665	19.8498	14.6894	15.3943	12.5529	15.8706	20.8182	17.6253	16.1018	12.3201	10.031	11.3071	9.51981	10.0545	10.0401
ENSGALG00000026597	0	0	0	0	0	0	0	0	0	0	0	0	0	0	0
ENSGALG00000000607	0.301233	0.35318	0.335819	0.376862	0.987807	0.24031	0.429057	0.692559	0.277831	0.390358	0.505147	0.534778	0.0793622	0.432463	0.119189
ENSGALG00000001226	4.8264	7.34287	4.06525	5.54558	6.98313	7.45849	5.70147	5.2669	4.70036	5.16921	6.34898	4.38593	6.32756	6.51744	7.49841
ENSGALG00000007205	126.706	222.108	161.4	921.189	1224.86	447.35	179.793	172.271	127.193	185.722	143.792	170.58	191.834	112.882	173.351
ENSGALG00000013922	16.3638	9.39609	41.5669	11.508	3.0958	48.7213	0.367773	0.567448	0.322491	3.89672	0.351808	1.58289	0.690895	0.884738	0.871591
ENSGALG00000008954	0.930076	1.09995	0.524579	1.4321	1.89436	2.17932	1.06334	0.437508	0.828813	0.48909	0.940327	0.610212	1.1506	0.725684	1.12001
ENSGALG00000013245	0	0	0	0	0	0	0	0	0	0	0	0	0	0	0
ENSGALG00000025608	0	0.699088	0	0	0.698313	0	0	0	0	0	0	0	0	0	0
ENSGALG00000026170	0	0	0	0	0	0	0	0	0	0	0	0	0	0	0
ENSGALG00000011288	0.531852	3.31592	3.4497	1.397	2.90188	2.10758	7.95243	0.643119	0.384733	1.32437	1.81874	1.11082	4.91247	0.875837	0.940782
ENSGALG00000025794	0	0	0	0	0	0	0	0	0	0	0	0	0	0	0
Novel01075	2.5281	7.28314	2.19613	4.51831	4.14509	6.46659	5.46066	3.71207	2.44273	3.7441	3.95683	4.64843	5.61384	3.11096	2.78653
ENSGALG00000028954	0	0	0	0	0	0	0	0	0	0	0	0	0	0	0
ENSGALG00000028588	0	0	0	0	0	0	0	0	0	0	0	0	0	0.540311	0
ENSGALG00000009314	10.1808	20.3467	19.4221	9.86164	8.13588	12.8345	12.8314	11.4468	13.2564	9.60017	8.12343	11.7245	8.76544	12.6338	9.00433
ENSGALG00000021848	0	0	0	0.648167	0	0.298503	0	0	0	0	0.150593	0	0	0	0
ENSGALG00000003662	19.3304	21.6288	18.7067	18.1133	17.8085	22.9719	20.0676	17.8988	21.1303	17.1153	21.6194	21.1003	18.8018	20.4069	15.7453
ENSGALG00000016040	8.29269	10.5493	8.24133	9.48092	8.93433	10.7861	8.0763	7.57955	7.8418	6.58294	7.28588	9.07467	10.9277	9.38569	7.09473
ENSGALG00000017681	0	0	0	0	0	0	0	0	0	0	0	0	0	0	0
ENSGALG00000010572	0	0	0	0.0260594	0	0.144015	0	0	0	0	0	0	0	0	0
ENSGALG00000000940	0	0	0	0	0	0	0	0	0	0.0783744	0	0	0	0	0
ENSGALG00000004639	115.958	285.949	128.62	184.216	213.375	295.84	161.101	101.329	96.1921	101.364	92.262	80.891	129.552	89.1517	99.4127
ENSGALG00000009967	24.3367	22.8743	19.0745	32.7742	35.4479	33.8686	28.6343	21.1246	22.4019	19.6683	25.8201	17.8259	26.4474	26.7949	21.9239
ENSGALG00000010596	0	0	0	0	0	0.0400071	0	0	0	0	0	0	0	0	0
ENSGALG00000002590	0	0	0	0	0	0	0	0	0	0	0	0.0305626	0	0	0.0136233
ENSGALG00000028396	55.8046	39.4464	60.3266	85.9263	111.388	77.4233	62.3825	42.0008	44.4244	37.7298	27.4865	37.3306	49.4334	42.9605	42.8804
ENSGALG00000005855	2.94361	8.9824	2.89575	7.13111	5.58939	10.5481	3.85298	2.03824	1.86626	3.76367	2.24654	4.11095	2.89527	2.05664	2.48469
ENSGALG00000012080	0.0959894	1.44055	0.389129	0.369504	0.539606	1.22522	0.420681	0	0.629563	0.248779	0.0858496	0.17041	0	0	0
ENSGALG00000019077	0.458664	0.734939	0.356379	0.588532	0.662502	1.11126	0.636542	0.413532	0.235018	0.297185	0.136738	0.373205	0.281957	0.274366	0.22685
ENSGALG00000015762	15.548	9.46972	6.71224	10.4156	14.2834	12.672	7.96445	10.0493	11.3397	12.211	6.86249	10.3061	11.5972	10.7983	14.1413
ENSGALG00000000272	0.0250986	1.12999	0.122096	0.231877	0.070546	0.907688	0.285991	0.0814641	0.102883	0.086732	0.0448946	0.133672	0.158698	0.108098	0.198615
ENSGALG00000001812	3.3374	2.1151	3.15686	3.78468	2.71841	2.34528	4.90183	4.06622	4.44927	4.20795	4.10081	4.19012	3.10515	1.94243	2.75998
ENSGALG00000011680	0.875435	1.34365	0.919489	3.20143	2.31151	2.05988	0.732454	0.947152	0.456726	0.584414	0.498246	0.830063	0.482248	0.628407	0.944682
Novel00436	0.42888	0.717093	0.438436	0.430681	0.646415	1.79831	0.817217	1.14995	2.01794	1.06322	1.28414	0.728286	1.06114	1.36529	1.22475
ENSGALG00000015325	0.746724	3.10175	1.47032	1.99843	2.16549	3.10144	2.52456	1.15414	1.13692	1.01374	1.33569	1.26253	1.34901	0.536015	1.35066
ENSGALG00000028314	0	0	0	0	0	0	0	0	0	0	0	0	0	0	0
ENSGALG00000014185	12.9021	9.41236	12.6037	21.5217	32.7808	20.9666	14.0575	13.6197	18.5842	12.7331	12.3004	13.1227	20.3005	21.1597	13.046
ENSGALG00000003716	0.950295	0.693262	0.599259	0.081291	0	1.19799	2.0361	1.02814	0.952214	1.00341	0.472173	0.656078	0.333817	0.985317	0.752007
ENSGALG00000012917	0.0283776	0.106468	0.0920314	0.327713	0.132938	0.422583	0.198987	0.153512	0.209384	0.343221	0.0761398	0.125947	0.388768	0.0814803	0.269476
ENSGALG00000014139	20.7337	24.6254	22.2772	21.4457	25.0917	23.9664	26.0597	24.8259	19.8658	20.9703	18.4304	22.1076	22.9379	22.3549	20.3092
ENSGALG00000022438	263.212	117.269	276.633	487.422	638.428	188.733	381.898	383.992	364.778	166.432	203.102	180.077	316.481	446.119	416.803
ENSGALG00000003263	2.76852	22.9034	4.26483	5.1581	5.86217	12.6823	7.27996	3.59439	2.90525	6.21858	6.93299	4.42346	2.56745	2.10654	5.34566
ENSGALG00000015167	0.0926398	0.308073	0.143392	2.42495	4.24511	3.30851	0.228837	0.47381	0.276179	0.261925	0.293754	0.11961	0.399383	0.568263	0.419864
ENSGALG00000028671	0	0	0	1.47553	1.19711	0	0	0	0	0	0	0.567078	2.01973	2.29292	0
ENSGALG00000008627	1.55832	2.24466	2.3464	1.75674	1.96407	2.81519	3.17081	1.70605	1.673	2.06746	2.75422	1.44911	1.50535	2.27714	1.8791
ENSGALG00000004000	38.4491	46.8493	33.8786	38.9033	38.057	46.6052	39.55	36.9028	35.4522	36.2389	36.5892	33.3818	32.2922	36.7375	39.5773
ENSGALG00000020627	0.113638	0.319762	0.276404	0.524928	0.851754	1.3699	0.597631	0	0.093164	0	0.304901	0.201741	0	0.163143	0.179852
ENSGALG00000003045	1.34202	10.1381	3.20541	3.04376	4.48573	9.95372	5.46821	3.72801	1.72469	2.94547	3.47101	2.76884	4.0899	1.87459	3.78874
ENSGALG00000010108	3.15825	5.50143	2.28628	3.9946	3.38174	7.99845	6.82177	1.58645	2.31182	3.80035	3.73255	2.00244	1.18867	0.890631	2.40999
Novel01640	3.44171	7.24548	4.83679	6.59487	8.45563	11.4436	5.02786	5.37862	2.82163	3.76623	4.1726	5.15961	6.77038	4.66657	4.78137
ENSGALG00000003722	2.52211	3.23867	3.38376	2.84326	2.55993	4.36472	2.84229	3.216	2.65849	3.08675	2.12142	3.17156	2.9743	3.44843	5.22722
ENSGALG00000007276	20.8746	21.2824	16.027	8.8367	8.84541	10.7957	22.0774	14.1334	14.8774	15.7308	13.6952	13.3801	13.0198	15.7026	13.232
ENSGALG00000003624	1.86194	4.17894	2.37225	4.8124	4.03412	6.5545	2.63746	2.93177	1.8127	2.13995	2.15591	1.72653	2.92574	1.50361	1.88125
ENSGALG00000008612	0.622124	7.35244	1.66453	2.7301	1.22405	5.77918	1.69044	0.471163	0.408031	0.752446	0.389484	0.77312	1.24567	1.16109	0.738468
ENSGALG00000012252	0.0856122	0	0	0.263646	0	0.182127	0	0	0	0.0739615	0.0765685	0	0	0.184363	0.135497
ENSGALG00000006584	1.57725	2.9588	2.2379	9.168	7.68434	7.49365	2.62673	2.47437	1.16378	2.18018	1.9749	1.47005	2.90878	2.54742	1.62259
ENSGALG00000003238	21.4445	19.695	20.1033	26.0832	26.9285	30.8356	20.6238	17.6426	24.1127	16.4034	21.843	19.1674	20.1664	22.7693	18.2073
ENSGALG00000003404	48.4998	39.6564	42.7162	18.3456	17.5057	25.7028	42.7978	50.1454	42.2733	41.4956	51.2822	56.6885	65.404	62.6287	65.6011
ENSGALG00000016140	0	0	0	0.0529679	0	0.146361	0	0.0744358	0	0	0	0	0	0	0
ENSGALG00000003966	614.271	635.281	575.475	646.911	778.975	656.128	585.305	771.221	744.068	799.358	540.729	730.527	573.486	686.012	801.885
ENSGALG00000016763	28.9458	31.0656	29.3815	15.8763	16.8468	17.102	23.6521	19.8623	27.4213	21.1177	21.7946	17.5905	18.8166	25.0202	21.9507
ENSGALG00000003143	2.92398	5.95488	3.65427	5.63406	5.53962	7.37734	3.32755	3.77525	2.52962	3.16805	2.97631	3.26944	3.66022	3.9079	2.97862
ENSGALG00000011238	5.15264	15.8946	8.15718	20.8264	18.8734	20.1432	10.045	6.12742	5.69917	7.50219	7.66732	6.28889	6.17898	5.5799	6.09866
ENSGALG00000004857	0	0	0.0444185	0.0140595	0.0171098	0	0	0	0	0	0.0326653	0	0	0	0
ENSGALG00000016224	7.2824	13.5987	9.18761	12.4064	12.8654	24.6741	11.4809	7.30204	8.49786	7.03999	5.94677	7.20383	10.2911	6.68685	7.13434
ENSGALG00000001113	0	0	0	0	0	0	0	0	0	0	0	0	0	0	0
ENSGALG00000000146	18.5699	20.4697	20.5817	12.2204	10.711	16.5252	24.3188	18.22	24.6808	18.6005	22.022	17.4333	25.2226	20.7996	23.9853
ENSGALG00000026326	107.674	41.867	36.3392	19.7729	14.5067	22.4437	70.8294	86.6315	82.3265	24.0728	52.4993	36.3546	51.9979	34.0411	53.6702
Novel00674	0.0275149	0.0258078	0	17.8999	4.40824	2.63402	0.0482344	0.0893068	0.0451153	0	0	0.0488471	0.0579921	0.0790031	0
ENSGALG00000014721	1.07743	1.69779	1.46757	1.89126	1.41325	1.58917	2.34208	1.91174	2.50862	1.19143	0.809439	1.53021	0.817512	0.773404	1.39829
ENSGALG00000003348	94.9042	60.9636	93.2021	76.6672	83.7515	60.9	63.121	97.6172	90.271	92.815	73.5219	91.6573	89.6244	80.238	96.2568
ENSGALG00000022827	0	0	0	0	0	0	0	0	0	0	0	0	0	0	0
ENSGALG00000017879	0	0	0	0	0	0.700124	0	0	0	0	0	0	0	0	0
ENSGALG00000009667	0.119534	0.953002	0.19383	0.782234	0.559968	3.17863	0.942961	0.840621	0.097998	1.29084	0.106907	0.318313	0.188953	0.514825	0.283776
ENSGALG00000008803	0.183484	1.14734	0.214882	0.439481	0.687639	1.15655	0.50035	0.110286	0.0835703	0.422705	0.0364671	0.180966	0.150392	0.087806	0.145198
ENSGALG00000007481	6.11684	14.316	9.6826	13.3654	12.4444	21.6464	10.1613	6.80703	5.2536	7.09622	7.65896	6.41211	7.98092	5.31078	5.3937
ENSGALG00000015440	9.27062	26.5328	13.1031	16.0895	15.7576	26.1029	19.6689	10.3979	8.56668	21.6184	12.9945	16.4984	20.3515	13.1954	19.6768
ENSGALG00000015382	0.407815	0.127505	0.303093	0.523286	0.38209	0.0481981	0.0893642	0.257381	0.334341	0.293598	0.182368	0.0301664	0.250699	0.0731847	0.268934
ENSGALG00000009065	18.2684	18.4121	18.4607	15.8408	13.8203	19.2572	14.819	19.0693	17.6127	15.7823	16.9813	18.4989	13.4324	16.3443	20.8916
Novel00939	0	0.330635	0.619238	0.63324	0.385314	0.499934	0.411968	0.190691	0.0963319	0.609068	0.210179	0.1043	0	0	0.185968
ENSGALG00000025578	0	0	0	0	0	0	0	0	0	0	0	0	0	0	0
ENSGALG00000025920	0	0	0	0	0.93721	0	0.876788	0	0	0	0	0	0	0	1.58317
ENSGALG00000012717	17.1224	16.8096	16.3813	14.5445	13.4756	16.5938	18.8101	16.4256	16.9854	15.3347	12.4041	15.0467	17.2021	13.1922	14.2723
ENSGALG00000007028	0.122586	1.01566	0.414123	0.0943771	0.325417	1.24596	0.447701	0.353675	0.1005	0.476565	0.292364	0.272033	0.624394	0.161324	0.646714
ENSGALG00000016592	8.89971	6.58399	6.75833	8.58883	8.80807	6.97758	16.4255	15.7994	8.68361	9.58365	11.0986	9.95823	8.58623	6.38841	8.13382
ENSGALG00000015667	1.14137	2.11053	1.39471	2.03363	2.05473	2.77497	1.40775	1.18195	1.14962	1.05648	1.29788	0.868405	1.45197	0.965607	1.35482
ENSGALG00000003011	0.121589	0.427671	0.32039	2.50406	2.13598	0.797543	0.532874	0.0657749	0.224287	0.472691	0.271863	0.0539643	0.0961009	0.0218198	0.120273
ENSGALG00000028755	6.53931	11.0936	8.36308	8.11723	7.72732	10.8483	8.49758	7.55768	8.15323	6.7962	8.23271	6.37446	6.78814	7.13091	6.62997
Novel01248	1.12747	0.906445	2.3506	20.0265	21.5042	10.9075	1.05883	1.04557	0.396145	1.94807	2.08876	0.929312	9.33557	0.751513	2.03934
ENSGALG00000001642	4.20177	13.226	5.0523	5.83924	5.20448	12.3727	6.92888	4.73861	4.02861	3.50692	3.18468	4.04578	5.74134	4.47307	5.49476
ENSGALG00000012311	63.5282	73.3552	67.7035	108.933	72.5919	93.5102	69.4006	66.5013	78.24	63.6516	60.0362	54.273	64.3912	58.2869	61.8565
ENSGALG00000004741	1.2539	3.04917	1.80735	2.28826	4.24235	4.39641	3.88743	1.93444	1.00895	1.9258	1.82754	1.19547	2.3981	1.96684	1.47002
ENSGALG00000009156	4.49139	7.70329	5.06838	5.61725	4.82639	6.99381	5.25438	7.25924	4.4036	5.02046	4.13171	3.88914	5.54457	4.53994	4.29407
ENSGALG00000014906	15.4321	11.5798	15.0144	6.37821	10.806	8.29378	21.3577	35.326	29.2989	18.5245	17.1435	11.1029	21.2274	14.4591	22.753
ENSGALG00000008220	70.3878	74.5124	56.5826	64.2532	54.9376	82.1398	64.6389	58.3805	72.9931	61.8966	54.9627	62.4797	70.5123	69.2041	67.989
ENSGALG00000010647	16.7943	19.3825	19.388	30.4353	34.8369	28.229	22.4745	22.8809	17.2815	20.4198	19.3471	15.3369	27.9678	19.8441	20.2358
ENSGALG00000014696	0.15065	0.192687	0.11104	0.253055	0.397778	0.699241	0.276099	0.177809	0.157192	0.0591585	0.134736	0.145881	0.115462	0.147464	0.162567
ENSGALG00000015077	4.88772	11.2935	5.08127	8.08976	10.8182	13.3929	9.58339	6.17255	5.31955	4.70808	4.55418	3.61296	5.6713	4.16865	5.66026
ENSGALG00000010898	1.26521	0.29668	2.57733	1.21759	0.237081	0.370089	0.194072	1.40308	1.60776	1.5849	0.947685	2.18998	1.43332	1.99804	0.888579
Novel01087	0.18725	2.01978	1.36636	1.00913	0.350877	0.531129	1.23096	0.911655	0.921085	0.161768	1.00482	0.415532	0.789322	0.268825	0.296357
ENSGALG00000008621	9.21585	33.0145	11.5688	25.8166	24.8545	32.5941	17.1371	10.4368	4.66038	10.69	14.1994	10.9073	4.14498	9.87149	11.0643
ENSGALG00000007016	12.5273	15.8972	15.8825	1.60743	2.8192	4.61584	17.5471	9.23503	15.2041	31.7779	15.0485	39.1376	23.2324	12.607	11.8572
ENSGALG00000014851	2.01903	2.51253	2.78773	2.43168	2.21007	1.53096	3.31164	4.49864	5.26082	2.64231	1.64484	1.88092	1.87492	2.72642	3.59097
ENSGALG00000009865	42.6105	33.0327	46.4409	21.3323	16.089	19.1944	48.0635	43.0152	48.3915	34.4984	48.3655	49.1391	49.5052	48.3454	48.2298
ENSGALG00000010190	6.49472	7.72616	8.06165	8.32115	8.74509	9.24559	6.94235	6.36761	8.48139	5.16874	5.50351	5.19178	4.43021	5.46676	4.0017
ENSGALG00000027715	0	0.999047	0.0539738	0	0	0.519269	0.350101	0	0	0	0	0.0590913	0	0	0
ENSGALG00000010709	3.9792	4.54614	4.89999	7.7164	10.4838	9.46228	3.80252	4.11096	3.53209	4.08386	3.50534	3.4259	4.19341	3.9087	3.52771
ENSGALG00000009056	7.54483	9.14271	7.80971	8.66869	7.59251	11.1782	12.4051	8.58973	9.79709	8.29315	7.43879	9.27973	9.75252	14.1709	10.8744
ENSGALG00000005541	0.362017	1.44312	0.807165	1.88131	5.51169	0.898493	0.555299	0.391674	0.0741985	0.781878	0.485663	0.883697	0.286129	0.454762	0.859436
ENSGALG00000007430	21.7629	41.697	27.5973	34.6395	28.7982	48.2915	33.693	21.641	25.6404	20.3223	18.9173	18.7969	26.9287	26.0131	24.5364
ENSGALG00000013583	2.56968	9.68647	3.89169	5.35649	4.06563	11.7755	6.28961	4.5637	5.40589	3.14148	3.44734	3.16323	3.78099	2.64504	4.73841
ENSGALG00000019355	15.9004	20.8728	18.8482	24.155	19.586	27.3071	18.6033	15.283	14.6069	10.9156	16.0618	12.6332	15.4846	17.095	15.2789
Novel01665	1.59045	2.08849	1.41845	0.73468	0.745062	0.676689	0.975839	1.20452	1.30391	0.549605	0.853467	0.988235	0.838035	0.114166	1.13273
ENSGALG00000028855	0	0	0	0	0	0	0	0	0	0	0	0	0	0	0
Novel00699	1.95534	1.17378	2.94873	0.27097	0.219839	0	0.411333	0.507726	1.28244	1.5541	0.524636	1.04139	0.41212	2.75103	1.11408
ENSGALG00000017910	0	0	0	0	0	0	0	0	0	0	0	0	0	0	0
ENSGALG00000016692	1.73109	3.85626	0.701761	0.277654	0.0675787	2.76197	1.01155	1.48271	3.37061	0.997006	1.41921	0.832325	1.82428	1.55327	2.28313
ENSGALG00000012699	2.80475	4.98457	3.11182	5.49306	4.61022	7.36241	2.84658	3.5669	3.3483	2.21051	2.02438	2.66435	2.33348	1.20092	2.02482
ENSGALG00000006646	10.5921	15.0533	11.4573	11.1867	12.4682	13.1694	13.5934	12.7826	12.6827	11.1853	15.5277	14.7371	17.564	11.2616	14.6353
ENSGALG00000010296	37.6703	28.1384	34.7593	22.2469	24.5631	26.1165	31.8673	29.8425	26.7484	32.1354	34.7248	35.0236	35.9332	29.4542	28.5627
ENSGALG00000005031	3.90699	6.76933	3.27768	4.55369	7.4736	2.92443	3.42454	2.34837	1.64603	5.67239	2.49938	4.16647	1.45822	1.55807	2.49059
ENSGALG00000006210	151.278	169.309	149.678	236.289	465.084	377.367	203.841	141.894	154.293	104.885	73.4965	100.142	145.506	129.481	192.96
ENSGALG00000007303	1.59937	3.82037	2.8701	5.30295	4.69525	6.00339	3.6075	3.0455	1.69585	2.54237	2.86085	3.3126	1.97762	1.94406	2.16004
ENSGALG00000010336	0	43.9003	4.07347	0.203581	1.23875	5.34408	3.47665	0.143046	0	0.571111	0.236497	1.40833	0.139332	0.0949068	0
ENSGALG00000025150	1.81009	0	0	2.09034	0	1.92534	0	0.979185	0	0.781878	0	0	0	0	0
ENSGALG00000025322	0	0	0	0	0	0	0	0	0	0	0	0	0	0	0
ENSGALG00000024964	2.5236	4.14232	1.2788	4.3715	6.20659	4.02644	1.38249	5.11939	0	3.27026	1.9749	3.08011	5.65135	3.623	5.2422
ENSGALG00000011881	2.32029	7.55316	4.94285	2.17165	2.81331	6.5169	4.90497	4.62696	4.36399	2.6727	2.72622	4.52305	2.82876	2.77592	3.63627
ENSGALG00000004352	48.8723	45.6385	39.4065	46.1116	45.3864	47.5426	45.1465	47.2917	50.646	37.205	41.2092	45.4814	49.1802	43.7652	45.8224
Novel01369	3.98029	8.96004	5.08272	6.81823	7.73812	9.80815	6.10538	5.05998	3.26318	6.18953	5.69574	5.7413	5.45293	6.21428	5.59083
ENSGALG00000028942	9.46736	5.27458	5.59821	4.76785	3.86818	6.20869	7.73675	9.47279	6.24435	7.68701	8.91292	9.92015	29.706	10.0661	13.4066
ENSGALG00000008399	2.94049	4.31866	4.59846	6.50954	10.0003	7.79889	4.29258	3.03419	3.9721	3.41723	3.68743	4.48644	3.56194	3.98112	3.30407
ENSGALG00000015774	1.40784	0.586889	1.90241	3.4925	1.61216	6.10088	2.60511	1.86166	0.512977	1.48653	3.77738	1.24967	2.30787	0.673721	0.990297
ENSGALG00000027281	1.41401	1.17025	0.404626	8.32476	3.74064	2.24132	0.801964	0.359963	1.5684	1.00601	1.26464	0.738319	0.175309	0.298531	0.658211
ENSGALG00000013639	0	0	0	0	0	0	0	0	0	0	0	0	0	0	0
ENSGALG00000005459	2.22414	6.02849	2.79721	4.30106	3.97078	6.80545	4.09854	3.10741	2.36902	2.69308	2.13016	2.87589	3.17438	2.5268	3.15978
ENSGALG00000014072	5.86163	11.4125	5.18451	19.9657	12.0655	19.8382	9.26363	4.80441	4.80557	6.36829	3.01837	6.38559	5.61562	8.16021	6.46585
ENSGALG00000027364	34.036	26.3829	32.958	57.1564	66.9807	61.2609	32.6014	32.6433	25.2536	30.4955	25.4558	22.8569	32.7748	22.6714	29.3746
ENSGALG00000003842	0.0467262	0	0.0378845	0.0719478	0.131336	0.0662687	0.0819126	0.0505541	0	0	0.167161	0.248859	0	0	0.147905
ENSGALG00000018350	0	0	0	0	0	0	0.843492	0	0	0	0	0	0	0	0
ENSGALG00000020873	0	0	0.12788	0.485722	0.295552	0.335537	0	0	0	0.272522	0.141064	0	0	0	0
ENSGALG00000003717	2.03074	8.7734	3.14327	4.82297	3.50547	9.25984	4.61715	3.16916	1.61442	2.63689	2.10242	1.95553	2.26976	2.22632	2.60043
ENSGALG00000020492	0.0185854	0.0174323	0.0150686	0.0357716	0.0261195	0.0263584	0.0733068	0	0.0533293	0.0321123	0.0498664	0.0412433	0.107722	0.026682	0.0367684
ENSGALG00000015124	0.715976	2.50307	1.5304	2.3051	2.43931	1.75391	1.65449	1.26758	1.44077	0.674772	1.68818	0.519984	0.960296	1.49511	1.80276
ENSGALG00000005207	86.8003	51.3911	99.1183	408.331	319.051	196.269	107.272	77.5185	132.504	56.9668	95.0707	65.517	67.7192	95.0883	124.015
ENSGALG00000014835	3.88503	12.6229	5.48397	9.44649	10.3045	34.4664	25.9684	6.27471	4.66305	3.09072	3.7996	5.24725	2.62145	6.68098	3.41721
Novel00409	1.11019	0.882849	1.09579	1.18917	0.927094	1.2151	0.951941	1.64503	2.1567	0.708903	1.07925	0.749804	0.534108	1.00481	1.64248
ENSGALG00000027784	6.96839	9.23895	9.34553	6.25229	4.51618	9.34408	8.93224	6.68896	7.55996	6.90273	8.48153	6.32501	7.37113	5.49099	6.96552
ENSGALG00000007394	6.54806	6.22633	7.81739	7.42314	8.41452	8.37079	8.74086	6.9545	7.3876	6.14999	8.40844	6.58559	5.85598	7.56798	5.63336
ENSGALG00000008542	14.1824	42.8787	23.2505	31.1307	36.8281	47.2049	31.2566	17.8368	11.6076	13.4963	15.2812	13.3559	21.7234	13.7979	17.7747
ENSGALG00000028210	55.2484	16.7025	55.5298	50.708	57.5385	29.626	47.5256	42.4843	58.8641	44.6727	72.0765	63.4293	54.0122	47.1969	70.097
ENSGALG00000003866	0.692172	0	0	0.562499	0.0720566	0.0272684	0	0	0	0	0	0.0341337	0	0	0
ENSGALG00000023868	0	0.322656	0.139453	0.264839	0.161149	0.609837	0.15076	0.930448	0	0.445777	0	1.67942	0.181258	0.370394	0
ENSGALG00000013782	0.057463	0.053898	0.256243	0.4424	0.29611	0.387106	0.201469	0.248682	0.0942203	0.198572	0.102786	0.229532	0.302782	0.0412482	0.0454728
ENSGALG00000027849	0	0	0	0	0	0	0	0	0	0	0	0	0	0	0
ENSGALG00000020471	0.153273	0	0	0	0	0	0	0	0	0	0	0	0	0	0
ENSGALG00000028290	2.22447	3.33834	2.51054	5.09667	5.03531	5.84273	3.13526	2.77252	2.46564	1.04543	1.62342	1.64283	1.76286	1.5329	2.05605
ENSGALG00000016731	20.135	21.9746	18.3083	22.8178	23.9777	23.9524	21.1124	21.0719	19.0529	23.735	23.3094	21.8816	24.491	20.4643	24.7194
Novel00653	13.4423	14.1493	11.9885	19.3182	15.3931	18.3229	9.4259	11.15	16.1633	9.41941	14.9611	7.95469	12.4345	13.5088	8.03716
ENSGALG00000014791	7.11831	7.49843	8.48833	8.38063	6.07418	10.0488	6.52728	5.9005	8.20609	5.7144	7.85512	7.34898	5.49342	6.58756	7.14092
ENSGALG00000009041	0	0	0.0421025	0.0799583	0	0	0	0	0	0.0448619	0	0.0460945	0.0547241	0	0.12328
Novel01264	48.6712	71.307	61.7467	63.1747	45.2241	73.3056	57.7041	55.7048	49.4657	55.7161	68.1128	59.0321	49.8783	52.839	68.3305
ENSGALG00000005573	23.3777	21.7233	26.2264	21.889	12.0882	18.939	22.0897	17.1818	21.4844	20.0373	22.8988	23.2616	22.2378	20.5168	18.8838
ENSGALG00000027075	0	0.7506	0.259529	0.6161	0.449861	0.453975	0.420858	0	0.393643	0	1.28829	0.426204	0.674662	0.114887	0.126654
ENSGALG00000027246	0	0	0	0	0	0	0	0	0	0	0	0	0	0	0
ENSGALG00000015841	0	0	0	0.433552	0.105523	0.079866	0	0	0	0	0.10073	0	0.118691	0	0.0891267
ENSGALG00000010930	0.688097	1.43655	0.575888	0.888623	0.644691	1.16476	1.82884	1.53696	2.36569	1.24644	0.238223	1.49742	0.701747	0.557664	0.702605
ENSGALG00000012568	24.2102	24.1704	31.0049	76.2507	126.303	65.1597	87.7761	19.4467	14.4351	42.3855	30.1006	51.2833	20.4881	28.4377	27.3589
ENSGALG00000028321	0	0	0	0	0	0	0	0	0	0	0	0	0	0	0
ENSGALG00000028093	0	0.246056	0.382845	0.323144	0	0.148819	0.3679	0	0.0430136	0.0453263	0.328468	0	0.0552906	0	0.0415187
ENSGALG00000005336	3.85763	14.2084	7.01819	9.8515	7.14043	16.0795	5.5255	6.00599	2.77693	5.36477	2.69279	5.01106	5.75091	3.98479	5.4353
ENSGALG00000021399	1.91098	4.32951	1.93859	4.2218	5.05991	4.22897	2.81594	2.46705	0.983907	2.05766	2.41092	2.91727	2.68513	3.31338	2.50578
ENSGALG00000026901	0	0	0	0	0	0	0	0	0	0	0	0	0	0	0
ENSGALG00000014444	12.6266	15.7084	12.636	10.0057	16.3839	12.7375	12.1325	16.5189	14.3798	12.597	12.7575	10.8797	10.0215	12.8559	15.385
ENSGALG00000000314	0	0.0337948	0.175274	0.0832173	0.135029	0.127748	0.284229	0.116945	0	0	0.0966723	0	0.113909	0	0.0285121
ENSGALG00000026225	0	0	0	0	0	0.0392641	0	0	0	0	0	0	0	0	0
ENSGALG00000026010	214.998	138.44	164.769	81.1561	78.5245	115.117	145.949	170.02	157.261	206.805	208.871	286.224	135.416	202.646	208.654
ENSGALG00000014720	0.258984	0.463749	0.267245	0.797553	0.992647	1.21877	0.268277	0.382092	0.135115	0.26442	0.357968	0.104494	0.0744343	0.118303	0.055894
ENSGALG00000000729	2.98352	5.42851	3.65572	6.07919	4.89705	5.9493	3.71619	2.57264	2.68507	2.69378	3.00942	2.09078	3.94789	2.68912	3.0888
ENSGALG00000006147	13.5344	34.447	18.6516	23.0788	19.4576	48.6746	25.0334	15.5709	13.9693	12.2079	13.2051	12.4771	14.3808	13.3284	12.4511
ENSGALG00000016328	14.7906	12.5966	9.6894	12.1614	13.137	20.3891	12.2382	13.5699	8.00304	10.4778	9.25973	17.8552	14.4022	11.976	10.9553
ENSGALG00000002114	5.02096	5.93338	5.45083	3.51614	3.53482	4.32483	4.00313	6.3837	5.67452	4.92583	6.36799	5.43887	3.61718	7.4323	4.9161
ENSGALG00000009177	13.9503	16.8285	16.2416	17.0028	14.9935	19.677	17.8251	15.7923	16.6412	16.0254	14.4145	14.3063	17.4653	17.1081	13.9272
ENSGALG00000027783	0	0	0	0	0	0	0	0	0	0	0	0	0	0	0
ENSGALG00000024773	0	0	0	0	0	0	0	0	0	0	0	0	0	0	0
ENSGALG00000001554	6.34675	7.96309	4.63343	9.49756	6.0751	9.19599	7.12838	5.64792	5.56368	4.84216	4.22652	4.73132	6.02246	5.42361	5.56599
ENSGALG00000028224	2.74556	5.09124	3.35184	4.03317	4.9969	4.00573	2.73846	4.67765	4.21721	2.04476	4.06433	4.25791	1.56308	1.56307	2.09775
ENSGALG00000017903	0	0	0	0	0	0	0	0	0	0	0	0	0	0	0
ENSGALG00000029131	2.09657	3.762	3.43665	3.93004	6.83242	6.4963	6.03238	3.59974	1.30782	3.78002	3.46486	3.84342	7.20469	2.51918	3.13787
ENSGALG00000029062	82.656	73.251	71.2501	43.5939	42.7989	48.9713	66.9265	70.7704	58.9963	84.5861	81.8583	75.7244	62.9921	77.5426	64.0969
ENSGALG00000014897	0.255456	3.30657	0.662775	0.668684	0.622287	3.40558	1.52259	0.608043	0.167545	0.750351	0.228471	0.634914	0.861464	0.146697	0.606457
ENSGALG00000028988	0	0.0789668	0	0	0.0788792	0	0	0	0	0	0	0	0	0	0
Novel00392	0.0420484	0.157759	0.102276	0.38847	0.472752	0.596345	0.405417	0.0909862	0.310255	0.0726524	0.0752133	0.149297	0.044312	0.1811	0.133099
ENSGALG00000015986	0.312854	1.46722	0.634136	0.361293	0.549598	1.08152	0.274222	0.634657	0.352672	0.304064	0	0.242992	0.535756	0.561434	0.742723
ENSGALG00000021762	0	0	0	2.62072	1.0631	0	0	0	0	0	0	0	0	0	0
ENSGALG00000020253	1.53769	2.0769	1.09712	3.45684	3.16953	4.23077	2.21041	1.53057	0.907671	2.60373	1.32025	1.69252	1.55565	1.58946	2.23898
ENSGALG00000007895	1.54291	1.90766	1.87643	1.67381	2.49692	3.97857	0.676194	0.986412	0.862455	1.09059	0.62724	0.871543	1.18253	0.906167	1.16547
ENSGALG00000009639	0.0529228	0.124099	0.0321814	0.0509306	0.0867727	0.150114	0.15076	0.0572583	0.0867758	0.137162	0.118331	0.187908	0.125486	0.0759783	0.0942299
ENSGALG00000001262	24.2055	27.7614	25.6305	79.3319	79.6665	73.5742	33.8633	20.9315	23.4636	18.5055	21.5161	17.0415	32.315	21.9051	25.3443
ENSGALG00000025633	0	1.08041	0	0.886811	1.07921	0.816812	0.504817	0.623118	0	0.497559	0	0	0	0	0
ENSGALG00000003485	43.3982	85.5364	43.3954	20.9709	23.3168	49.2438	40.7286	40.2774	34.2657	33.9286	36.2527	46.2087	57.3747	34.8719	48.4522
ENSGALG00000013674	3.0443	1.07406	2.98906	1.41916	1.67472	1.36655	0.881297	2.14543	1.83179	1.93028	2.42296	2.05769	1.73654	2.66642	2.93951
ENSGALG00000008821	58.2211	44.3967	83.6914	127.853	119.477	67.7798	68.8459	88.6994	80.7742	88.0544	70.0771	88.4391	84.6252	63.6758	100.187
ENSGALG00000017379	6.11981	7.68046	7.96682	16.5236	22.0467	19.0089	11.1815	8.48627	8.62116	11.3186	6.93805	8.7222	11.1727	6.62034	10.2996
ENSGALG00000009965	2.78329	5.78064	3.32046	4.31624	5.28994	5.27254	2.16079	4.1728	2.28184	3.33198	1.99142	3.6	2.97502	2.65436	2.23399
ENSGALG00000024326	7.39304	8.14579	7.36623	8.88057	10.7238	9.97974	7.53411	6.89044	5.84199	7.65664	8.20535	7.27402	8.63584	6.68156	5.88565
ENSGALG00000002665	10.6209	12.1467	11.1794	15.0269	9.55816	17.5735	8.90112	9.32386	7.63808	8.6524	10.0823	12.8597	9.81816	8.76085	9.5844
Novel01149	2.04631	6.92132	2.96627	4.82176	4.58973	7.60714	3.04373	3.95827	2.4402	3.26782	2.32928	2.69709	3.33273	3.38289	2.89516
ENSGALG00000005935	6.00694	5.13368	5.72649	5.50763	5.10671	6.3693	5.61354	5.61448	5.46465	4.9148	4.30604	4.71721	6.54571	5.76281	6.15533
Novel00280	0.0746794	10.4369	1.81645	0.0574946	0.209906	10.0088	1.11278	0	0.122449	0	0	0.0662891	0.236099	0	0
ENSGALG00000028893	0.54581	0.292542	0.316093	0.420212	0.0730543	0.276459	0	0	0.0639249	0.404171	0.697363	0.968977	0.328682	0	0.185109
ENSGALG00000004771	16.9634	142.419	26.1597	39.5527	25.1698	119.603	45.0915	20.6003	11.1257	12.4417	10.1556	12.7835	16.6361	10.3875	13.4238
Novel00861	5.95939	6.28837	6.67717	7.45558	5.93243	8.04095	6.6382	6.98489	6.24285	5.8992	4.33052	3.93065	7.10884	6.32755	6.28787
ENSGALG00000025789	0	1.29649	0	1.06417	3.23763	0	1.81734	0.747742	0	0	0	0	0	0	0.546914
ENSGALG00000026759	0	0	0	0	0	0	0	0	0	0	0	0	0	0	0
ENSGALG00000018770	11.5469	27.4761	23.1221	25.7148	36.8846	46.5458	27.3064	35.7178	6.03572	27.3825	19.7533	21.5998	21.0703	17.8011	33.2999
ENSGALG00000020679	0.0169016	0.015853	0.0548137	0.0260247	0.0158355	0.0838966	0.0888873	0.0548588	0.0138565	0.0146016	0.0302325	0	0.124681	0.0849266	0.0534998
ENSGALG00000012875	0.0876353	0.0410991	0	0.0337346	0.0410536	0	0.0768137	0	0.0359232	0	0	0	0.0923529	0	0
Novel00311	2.28757	5.2926	1.73106	1.40893	1.21452	2.05473	1.80458	1.89748	1.7504	1.18576	2.25052	1.48908	2.49107	1.91575	1.50854
ENSGALG00000001610	14.8958	12.1367	12.3554	9.43342	9.90438	12.2909	11.823	12.7741	14.013	19.3327	14.2432	18.7366	20.4359	20.3996	23.7654
ENSGALG00000028532	0.164961	0.0221038	0.0382133	0.0725722	0	0	0.0826235	0.0509929	0.0193201	0.0203589	0.189689	0.0418365	0.0745035	0.0338322	0.0186486
ENSGALG00000017102	0	0	0	0	0	0.269818	0.0667026	0	0	0	0	0.0675499	0	0	0
ENSGALG00000001632	0.240201	7.66015	2.14224	0.739709	0.787671	5.96156	3.05283	0.779636	0.196925	0.415025	0.429655	0.426429	0.885961	0.344843	1.14048
ENSGALG00000011515	8.56957	13.279	10.6861	14.642	12.6539	14.3747	11.7942	9.97646	10.9493	8.48573	8.67279	8.38524	11.381	10.9539	13.0275
ENSGALG00000028838	13.852	17.3065	18.8643	19.2043	13.5358	20.9499	26.0378	24.2364	24.7976	18.8385	23.0837	16.7145	19.7867	20.1972	20.9813
ENSGALG00000016055	1.50651	4.85949	3.60474	6.70444	2.92623	9.92728	3.60716	2.42501	1.53633	1.65067	0.591528	1.95695	1.93611	1.47704	1.80278
ENSGALG00000002690	6.39245	8.2242	6.17572	12.7656	20.6295	11.428	7.55665	5.6442	6.18448	6.09381	8.43339	6.9352	10.1694	9.19486	9.30317
ENSGALG00000001277	4.52615	5.18262	4.44811	3.8014	4.42421	5.83557	4.75725	4.85454	4.40142	4.02869	4.78403	4.48723	4.29489	5.78063	5.31831
ENSGALG00000016851	3.71383	4.19953	5.16186	4.81187	4.92231	5.79929	6.04543	4.76009	5.00736	4.76234	4.50199	4.65197	5.31835	4.49576	5.50917
ENSGALG00000008700	32.597	59.6764	44.3847	20.1351	21.7134	52.8728	30.8499	39.4854	27.1681	27.4593	25.1341	36.0963	24.0234	23.4377	23.2672
ENSGALG00000004406	0.203054	0.0761827	0.0658526	0.406455	0.380491	1.92946	0.498345	1.05451	0.0665884	0.24559	0.399531	0.396531	0.427971	0.291514	0.514193
ENSGALG00000017332	0	0	0	0	0	0	0	0	0	0	0	0	0	0	0
ENSGALG00000028308	0	0.431603	0.213188	0.0759138	0.184768	0.745831	0.230474	0.248924	0.0269463	0.0283951	0.117584	0.0875257	0.311736	0.165153	0.0780292
ENSGALG00000026376	0	0	0	0	0	0	0	0	0	0	0	0	0	0	0
ENSGALG00000023195	0	0	0	0	0.0338054	0.0255859	0	0.117112	0	0.0311712	0	0	0	0	0
ENSGALG00000013569	37.0641	156.342	62.8332	57.5567	57.1205	141.27	82.0489	49.3282	46.9609	39.4794	27.5927	35.7974	46.0501	38.6233	46.6619
ENSGALG00000003569	0.697038	0.610207	0.301409	1.57414	1.21906	1.38399	0.40731	0.904968	0.495261	0.521889	0.540285	0.206242	0.832503	0.567062	0.294184
ENSGALG00000008169	22.2385	43.7011	25.0712	35.2298	32.2686	47.3091	31.7531	25.073	23.3903	21.4883	22.1682	20.0939	27.8379	21.7365	21.4526
ENSGALG00000022295	0	0	0	0.182051	0	0.0419203	0	0.0639592	0	0	0	0	0	0	0
ENSGALG00000013766	0.520567	1.23044	0.455828	1.09011	1.19006	2.34775	0.839565	0.473099	0.341423	0.503692	0.577315	0.702363	0.768027	0.388621	0.576724
ENSGALG00000016946	81.3959	62.9878	85.6358	63.7972	54.6556	53.5861	63.4374	67.9946	79.7367	77.1057	74.3388	84.7578	86.8993	70.7973	74.2782
ENSGALG00000016310	0.140007	0.196981	0.397299	0.323367	0.327937	0.446764	0.184077	0.454429	0.746084	0.18143	0.313043	0.248554	0.0737718	0.25125	0.221586
ENSGALG00000027223	0	0	0	0	0	0	0	0	0	0	0	0	0	0	0
ENSGALG00000017150	0.0826643	1.31811	0.156385	0.350031	0.258166	0.859739	0.519272	0.119248	0.158132	0.107122	0.147864	0.0733769	0.261343	0.0395588	0.119929
ENSGALG00000027301	1.10105	1.48906	0.560535	0.571693	0.191924	1.14392	1.8404	0.858807	0.797715	0.508787	0.160306	0.386393	0.755558	1.10282	0.709201
ENSGALG00000000181	28.6262	69.5802	38.136	65.7554	67.9135	67.5789	49.5814	43.6254	35.9281	36.3629	32.931	47.071	40.1342	44.2842	52.2762
ENSGALG00000025751	180.126	132.71	253.274	276.028	285.571	182.915	197.371	145.04	157.741	151.018	223.215	137.464	133.444	108.525	162.718
ENSGALG00000012965	1.02458	9.61011	1.88292	2.15607	2.43186	8.47635	2.6343	1.69972	1.00798	1.71128	1.1607	2.06145	1.29568	0.882556	0.810789
ENSGALG00000014943	0.110768	0.0692637	0.0598718	0.0284262	0.0345935	0.0523648	0	0	0.0302704	0	0	0	0.0389102	0	0
Novel00486	13.3004	18.9018	17.7684	12.567	9.91244	16.648	15.014	19.2956	18.6278	16.0604	17.9332	15.2048	13.3792	12.1511	16.0667
ENSGALG00000000187	0.0608432	0.399479	0	1.42869	0.11401	0.884471	0.05333	0.0987414	0.074822	0.15769	0	0.94513	0.288534	0.24021	0.264812
ENSGALG00000016089	26.4082	21.1533	22.3548	20.5553	18.3352	22.0281	19.385	24.4787	23.4396	21.9345	20.1701	22.7955	29.1331	27.364	29.8212
ENSGALG00000018337	0	0	0.655724	0	0	0	0	0	0.66305	2.0961	0	0	0	0	0
ENSGALG00000012890	0.014234	0.0934561	0	0.0767097	0.133361	0.0908418	0.0249526	0.0770002	0.0116695	0.0122969	0	0	0	0.0715222	0.0112639
ENSGALG00000028771	0.311892	1.75525	0.948278	0	0.51138	1.43759	0.888478	1.26541	0.319624	0.202085	0.418418	0.276851	0.0821704	0.223883	0.370219
ENSGALG00000014682	7.27182	22.6632	6.3514	30.8171	26.0756	30.2128	14.4281	7.36688	5.8262	6.73911	7.03578	6.04407	10.0668	6.14522	8.29169
ENSGALG00000028822	6.02799	6.51874	5.83606	5.76013	11.9599	9.65544	4.59986	8.59345	5.34894	5.02386	4.72525	5.41369	5.94145	4.27612	8.24962
ENSGALG00000024292	2.39514	17.2235	6.43711	6.69299	5.0699	18.8715	5.3262	3.35917	3.16361	2.4907	3.25287	4.25209	9.67564	4.23454	2.73776
ENSGALG00000016163	0.0879563	0.164999	0.0950837	0.31601	0.357101	0.873198	0.179889	0.190324	0.0721096	0.177302	0.0786651	0.182174	0.154485	0.14732	0.301615
ENSGALG00000016118	0	0	0	0	0	0.0405335	0	0.18553	0	0	0	0	0	0	0
ENSGALG00000026680	0	0	0	0	0	0	0	0	0	0	0	0	0	0	0
ENSGALG00000008199	7.15391	8.47271	7.84327	10.4564	9.80385	13.0382	10.482	7.76307	11.2573	5.16567	6.93298	5.51611	6.72886	5.68708	8.01014
ENSGALG00000027078	0	0	0	2.50841	0	0	0	0	0	0	0	0	0	0	0
ENSGALG00000002527	15.9277	19.8134	15.0813	28.2646	38.0306	28.8372	22.311	20.8175	26.4866	10.865	19.2293	10.2276	13.8487	12.163	15.3158
ENSGALG00000005358	0	0	0	0	0	0	0	0	0	0	0	0	0	0	0
ENSGALG00000007514	8.37944	9.1346	5.74104	9.98141	9.63773	13.0206	8.16276	6.03661	4.99013	4.20674	6.31479	5.07873	7.03448	6.02951	8.47738
ENSGALG00000006418	11.7462	13.982	11.7915	12.614	12.9794	15.2077	12.8856	13.2326	12.6381	10.7231	12.2491	10.8673	12.3403	11.5349	10.8285
ENSGALG00000001201	18.1164	19.0226	18.9914	12.5551	11.3342	16.8415	17.0228	21.6857	20.7108	20.9021	16.3618	17.0811	22.0601	20.0705	23.4166
ENSGALG00000012662	10.2339	12.5526	10.4858	17.9802	19.7036	33.0954	11.2374	12.0052	8.26721	14.1525	11.7009	12.3784	11.6935	16.253	22.4564
ENSGALG00000027085	0.351535	0.973474	0.583604	0.676604	0.792032	0.937764	0.689615	0.706333	0.397991	0.773701	0.516515	0.609221	0.740918	0.504679	0.622602
ENSGALG00000010773	2.46621	1.20689	0.608556	0.74297	2.4111	1.97694	0.187971	0.580053	0.615356	2.59376	0.383599	0.951796	2.37297	3.00181	6.19424
ENSGALG00000000368	3.81459	11.768	6.0889	8.67274	14.0166	15.0465	9.40373	5.77147	4.42224	4.17084	5.0908	4.70868	4.61665	3.10186	4.71662
ENSGALG00000012072	3.30537	11.5515	3.82136	7.12533	7.14574	11.7889	6.43825	5.25827	2.77008	3.7651	3.44891	3.92289	3.74133	3.67324	3.10975
ENSGALG00000006035	10.6329	10.2534	8.86309	13.3983	11.1002	9.36146	10.5068	6.18287	8.2112	7.89578	9.31384	7.26434	9.7155	5.27419	7.6737
Novel00582	0.286466	0.496049	0.661046	0.983974	0.516145	0.625038	0.270406	0.524503	0.361314	0.894741	0.867155	1.01712	0.441219	0.711801	1.37759
ENSGALG00000027626	0.605163	0.354761	0.42932	0.465906	0.496115	0.37549	0.530435	0.327369	0.0620167	0	0.202964	0.268586	0.239153	0.1086	0.419029
ENSGALG00000001647	7.28107	6.17893	7.62745	6.94026	8.85747	7.91679	7.27342	8.60278	8.56543	5.5913	9.22007	8.5148	8.76917	8.36242	8.39577
ENSGALG00000006777	76.9362	42.8013	74.5872	56.2108	66.4395	58.3103	80.075	75.6359	64.5714	81.2891	64.6463	79.3099	68.2863	70.5563	79.5159
ENSGALG00000016213	0	0	0	0.313831	0	0.361324	0.178648	0	0.0835479	0	0	0	0.107394	0	0
ENSGALG00000003158	8.81068	9.88314	8.86375	10.9639	10.3102	10.4555	7.75422	8.67649	7.57709	8.17089	7.30103	7.34197	6.17736	6.27287	5.97621
ENSGALG00000025892	67.3219	42.5476	65.3952	41.8011	41.9215	38.1	46.9362	59.8295	65.7248	63.3425	54.1088	76.2347	64.7603	67.3226	75.2771
ENSGALG00000024072	0.904215	11.3517	1.46623	1.82068	2.6067	8.38484	1.70705	1.80607	0.741306	2.22331	2.67492	2.16092	1.46599	1.49784	1.81637
ENSGALG00000006206	84.3221	64.9252	62.3714	44.6011	55.42	54.8857	52.8123	61.5291	75.9335	59.7318	75.063	68.9486	52.4713	58.8061	57.6707
ENSGALG00000020534	2.84931	2.17587	3.57766	4.2514	2.57507	4.82772	4.88442	4.71958	5.02335	2.1348	2.59343	2.75301	2.68382	2.3711	1.8557
ENSGALG00000028515	0.760236	0	0	0	0	0.539096	0	0	0	0	1.35986	0.674823	0	0	0.601605
ENSGALG00000016119	8.79989	20.2455	11.88	16.9053	18.5897	27.2123	13.6619	10.4863	11.0088	10.7042	11.36	10.4825	13.7354	11.3225	10.7905
ENSGALG00000028537	1373.74	844.786	1126.17	1250.59	1686.45	965.899	1130.19	1274	1300.42	1481.34	1108.67	1327.55	1512.41	1222.02	1474.85
ENSGALG00000009709	7.26786	6.56024	7.42122	6.1573	6.7809	8.79804	7.38326	7.07363	8.65095	5.56948	6.41852	6.61327	9.35757	6.98514	6.71392
ENSGALG00000002290	0	0	0	0	0	0	0	0	0	0	0	0	0	0.035436	0
ENSGALG00000027729	0	0.056548	0	0.0464151	0	0	0	0	0	0.0520839	0	0	0	0	0
Novel00303	0	3.34527	1.9785	0.289035	0	0.66555	0.329066	0.406181	1.53893	31.6226	0.335767	1.33298	1.18691	0.538977	0.297089
ENSGALG00000006141	4.44871	12.8427	6.45236	9.36168	7.22468	14.0557	8.10202	5.82927	6.2813	6.66173	5.87975	6.23049	7.18858	5.78358	8.17526
ENSGALG00000026034	0.0543705	0.0892453	0	0.115113	0.127352	0.23133	0.0595708	0.088237	0.0334311	0.0117429	0.0486271	0.0120655	0.0572974	0.0195142	0.0215128
ENSGALG00000006040	46.6139	30.638	38.7044	24.6707	29.5513	24.3445	25.2347	39.365	36.8179	45.9945	48.898	67.9982	32.3405	41.3597	32.9012
ENSGALG00000015342	1.40487	1.47865	1.19989	1.69256	1.63777	1.87836	1.34419	1.12546	1.2133	0.926475	1.00709	1.00905	1.20926	1.04693	1.0014
ENSGALG00000025860	7.28219	7.89029	7.63477	10.2946	8.70499	6.09877	10.895	16.9122	3.08803	11.0096	11.4538	24.6302	5.95413	2.88404	3.03038
ENSGALG00000025672	5.66635	8.85801	12.251	7.27075	7.96337	9.37558	4.55276	24.0113	10.8394	4.07937	8.024	6.70632	13.9332	9.15173	13.8257
ENSGALG00000028376	0	0.042231	0	0	0.0421842	0.0159637	0	0	0	0.0194486	0	0.0199829	0	0	0
ENSGALG00000029054	37.8107	44.614	82.021	137.653	117.488	135.416	48.1259	30.6811	35.5328	48.5633	24.7328	36.062	56.484	71.0295	45.6774
ENSGALG00000025660	0	0	0	0	0.837976	0	0	0	0	0	0	0	0	0	0
ENSGALG00000023364	4.19637	14.9798	3.20412	50.4997	40.4618	59.9766	11.4631	4.23159	5.411	2.74537	3.38871	2.35067	2.44728	3.24621	2.70819
ENSGALG00000003526	7.80541	10.1655	9.19333	8.68908	8.07892	8.71379	9.56894	8.18807	10.5932	8.52011	7.73557	8.00519	7.30855	8.27184	7.13663
ENSGALG00000028733	0	0	0	0	0	0	0	0	0	0	0	0	0	0	0
ENSGALG00000003246	16.7966	16.7539	18.9369	12.2238	12.9577	15.7033	14.0999	15.5507	20.2446	18.1025	12.1075	15.4288	20.0345	14.4414	23.2442
ENSGALG00000016934	0.0162305	0.0761176	0.0526371	0.0374869	0.0608266	0.218677	0.0142263	0.0175601	0.0133063	0.0280435	0	0.0720349	0.0171042	0.0349518	0.0513753
ENSGALG00000006859	0.0621192	0.0388435	0	0.00797079	0.0291003	0	0.0998222	0.0336041	0.0169758	0.0268328	0.0185191	0.01838	0.109105	0.0222953	0.0819291
ENSGALG00000013964	0.22346	0.452288	0.314674	0.44368	0.39669	0.758937	0.412351	0.470809	0.568886	0.325138	0.473341	0.36539	0.793229	0.312367	0.604956
ENSGALG00000008007	0.0511186	0.258915	0.157494	0.810723	0.632201	0.478487	0.869242	0.365022	0.0921993	0.291469	0.466331	0.290403	1.24979	0.132099	0.388341
ENSGALG00000010633	0.670617	6.34729	2.17488	2.48762	2.3419	4.4096	3.04591	1.84687	1.04961	1.6854	1.25408	2.0564	2.05591	1.57544	3.03939
ENSGALG00000019094	2.70573	4.7585	4.87498	5.41029	3.52091	6.76867	4.67736	3.90319	2.55715	3.57121	2.85684	2.83539	2.45536	2.83243	2.31959
ENSGALG00000021951	0	0	0	0	0	0	0	0	0	0	0	0	0	0.496104	0
ENSGALG00000010562	0.0842834	0.810307	0.102502	0.259554	0.256642	0.702259	0.295503	0.159579	0.0690984	0.200237	0.03769	0.187035	0.222051	0.287377	0.283461
ENSGALG00000000136	0.43134	1.21374	0.699439	5.31332	0.505163	3.36457	2.36297	0.466676	0.353627	0.27948	0.0964438	0.287159	3.86376	1.70294	2.38935
ENSGALG00000008230	6.28058	8.16697	6.99012	7.45081	6.95429	9.15025	5.5801	6.27002	5.61713	6.06712	5.28521	5.49893	10.6801	7.82812	10.279
ENSGALG00000001394	8.32912	12.2164	9.26888	7.92129	8.03323	10.4229	11.1656	9.40901	11.7156	7.6189	8.03353	8.62556	10.7567	10.5802	8.49743
ENSGALG00000027390	0.270804	1.69335	0.717232	1.45942	0.828822	5.28726	1.09187	0.8399	0.488431	0.764239	0.629713	0.624985	1.16055	0.660922	1.71438
ENSGALG00000017411	0.801937	0.952766	0.21673	0.16464	0.20036	0.0758222	0	0.404895	0.175321	0.646617	0.430334	0.427103	0.0563405	0.422142	0.803833
ENSGALG00000027020	0	0	0	0	0	0	0	0	0	0	0	0	0	0	0
ENSGALG00000002678	3.47509	5.26814	6.70837	12.4478	15.7048	19.4033	12.1071	4.66549	5.55434	4.32246	6.54681	6.89512	6.84219	6.84064	6.9019
ENSGALG00000007692	0.0923737	0.0866428	0.224683	0.142235	0.25964	0.0655037	0.323868	0.0999412	0.151462	0	0.0826159	0.245987	0	0.198924	0.0730991
ENSGALG00000014263	2.39033	3.9761	2.64963	2.8323	2.71195	4.03891	2.488	2.78819	2.63331	2.90396	2.50526	3.11635	3.1094	2.88206	3.32501
ENSGALG00000015191	0.103857	0.194828	0.084205	0	0	0	0.0910326	0.112366	0	0	0	0.092189	0	0.0745511	0.164373
ENSGALG00000007917	0.110419	0.0776765	0.100716	0.159394	0.116386	0.3132	0.133078	0.0895987	0.0565784	0.226557	0.135788	0.171524	0.436362	0.0495383	0.22937
ENSGALG00000005036	15.0024	18.6542	12.4837	34.5554	39.8562	34.2425	12.6308	15.3504	16.0014	8.93184	13.7707	7.97259	13.1317	11.938	13.5317
ENSGALG00000001225	9.30065	13.2776	11.8592	9.30542	10.6333	12.4206	11.7793	9.41981	11.068	9.61009	8.3365	7.38287	7.98787	10.029	7.668
ENSGALG00000004280	0.0499498	0.0234254	0.020249	0	0	0.0177101	0	0	0	0	0	0.022169	0.0263194	0.0179275	0
ENSGALG00000007069	0.209013	0.605958	0.246491	0.234059	0.462866	0.646753	0.44968	0.18502	0.264822	0.229815	0.101964	0.269862	0.140168	0.136394	0.105255
ENSGALG00000026370	0	0	0	0.239875	0	0.0946889	0	0	0	0	0	0	0	0	0
ENSGALG00000011394	1.00207	7.4252	1.43533	3.24021	2.72269	4.99777	2.16654	1.77079	0.931067	2.36625	1.19495	1.89757	1.30242	0.959076	2.06174
ENSGALG00000000783	1.36397	9.76347	1.92073	1.43698	2.01779	6.36326	4.53048	1.16504	0.647398	1.42643	1.73353	0.892117	0.605221	0.772966	1.47703
ENSGALG00000023622	0	2337.82	223.782	108.913	61.1924	0	336.156	47.9094	43.4788	25.5037	11.3321	0	2.89079	64.9794	11.784
ENSGALG00000016629	0.587229	2.59863	0.695854	1.84318	1.70699	3.65163	1.91369	0.684208	0.666596	1.07967	0.686796	0.748467	0.666444	0.583651	0.810243
ENSGALG00000017195	0.053803	0.656045	0.305355	0.745599	0.705726	0.877509	0.330114	0.116421	0.308767	0.557773	0.336836	0.52534	0.396895	0.115863	0.468341
ENSGALG00000010302	3.84962	8.77588	5.64292	8.83242	8.21677	12.4379	5.85466	4.08224	4.3265	3.21561	3.21495	3.23607	4.02999	2.96464	3.55072
ENSGALG00000010427	0.250903	0	0.101713	0.193167	0	0	0	0	0	0	0	0	0	0.270155	0
ENSGALG00000005704	360.452	359.754	416.378	525.038	668.875	399.829	379.107	344.286	359.028	403.531	395.681	388.023	434.936	373.189	442.953
ENSGALG00000003425	0	0	0	0	0	0	0	0	0	0	0	0	0	0	0
ENSGALG00000027709	0	0	0	0	0	0	0	0	0	0	0	0	0	0	0.0166835
ENSGALG00000011392	2.50716	4.07107	3.0819	5.58313	4.54647	6.2321	2.17394	3.70424	2.6301	3.44692	3.01387	3.44591	3.66489	3.46393	3.15736
ENSGALG00000025693	0	0	0	0	0	0	0	0	0	0	0	0	0	0	0
ENSGALG00000011145	5.14848	17.3407	8.80931	7.85026	11.4641	13.2759	19.604	19.6044	13.0738	13.2569	17.8205	10.7722	21.8787	5.54353	19.5244
Novel00094	0.234641	0.220083	0.348775	6.11188	2.34495	1.38656	0.0685554	0.550036	0.0961832	0.574343	0.349757	1.00668	0.041212	0	0.402308
ENSGALG00000015204	3.32168	5.34342	4.3872	4.38593	4.14953	5.26812	5.25949	4.36666	4.37766	4.19647	3.06663	4.37517	4.30975	3.61502	3.85807
ENSGALG00000004045	4.57889	6.88481	5.27111	6.78135	5.86198	7.65888	4.7794	5.74816	7.27862	3.56321	6.84618	5.21243	4.71488	4.34062	4.61922
ENSGALG00000005518	3.45383	13.989	8.86226	19.2933	16.0695	20.0108	10.9569	7.07015	5.34137	5.15386	5.63389	4.45934	3.90861	3.80338	5.12467
Novel01258	1.86665	0.477502	0.825509	1.43711	0	1.56434	0.743704	0.917986	0.417367	1.02622	0.758849	0.602521	0.894153	0.609056	0.402861
ENSGALG00000023723	3.2835	6.1099	3.37066	3.01719	1.73666	4.26244	3.36545	2.72166	3.25636	1.76147	1.20781	1.69235	2.20452	2.433	2.05355
ENSGALG00000003674	6.36903	6.75309	4.35214	6.51057	7.60377	7.08422	9.93283	5.18537	9.18573	5.66791	6.21061	6.65558	8.41792	5.07641	5.9166
Novel00724	6.30158	7.55095	7.62859	5.39673	6.0124	7.80971	6.2962	6.6458	6.43411	5.43153	6.28223	5.91432	7.05205	6.11075	7.62872
ENSGALG00000006656	2.38671	3.73105	3.26308	5.74666	6.24807	6.03973	3.56868	2.55691	1.86079	3.82059	3.01353	2.49242	3.94539	3.62802	4.14773
ENSGALG00000004083	0.245872	0.415112	0.418628	0.738244	0.0921448	0.714842	0.19396	0.0798042	0.100787	0.148688	0.0879597	0	0.103643	0.0882461	0.0778273
ENSGALG00000004230	0	0	0	0	0	0.0665961	0	0.0508039	0	0	0	0.083363	0	0	0.0743181
ENSGALG00000015244	0.178041	0	0.0360878	0.0342679	0.291918	0.031563	0.078028	0.0481567	0	0.153812	0.159234	0.355586	0	0.255604	0.0704456
ENSGALG00000005453	0.789654	5.59128	1.51898	1.5735	2.23403	6.01679	1.995	0.988359	0.634692	1.0166	0.526218	1.07202	0.864798	0.833575	1.10274
ENSGALG00000015235	1.08519	2.48811	0.830965	1.57812	1.9205	2.47958	0.951186	1.435	0.69197	1.56252	0.916636	1.12381	1.71541	0.605868	1.43126
ENSGALG00000008591	0.199762	0.107068	0.300786	0.285617	0.48127	0.627326	0.350189	0.277877	0.140376	0.197231	0.204183	0.177318	0.270663	0.143393	0.203245
ENSGALG00000009792	1.75777	2.61047	2.31588	4.34178	2.88206	7.47878	3.40241	2.06025	2.22167	3.22694	1.24457	2.14539	2.00676	1.20919	2.4922
ENSGALG00000005792	22.0249	23.6338	21.1598	17.8169	26.0055	38.2147	27.3621	25.4672	26.3611	22.1729	12.0898	17.6945	22.3748	13.8434	17.1724
ENSGALG00000026187	0.167242	0.224095	0.387417	0.147151	0.604386	0.135536	0.523538	0.387735	0.509269	0.433449	0.641039	0.530188	0.579092	1.66355	0.605008
ENSGALG00000003765	0	0	0	0.0118027	0	0	0	0	0	0.0397325	0	0	0	0.0110045	0
ENSGALG00000003243	15.3484	12.3396	10.6817	14.4214	28.1051	16.0174	13.6519	10.0412	11.6998	10.157	16.3136	10.822	9.32232	10.1083	9.49824
ENSGALG00000000637	28.9108	21.3559	20.8589	14.2362	12.4739	14.7544	19.7314	20.9456	18.5873	20.2534	20.5934	20.6672	22.2997	25.0696	18.0685
ENSGALG00000012808	1.04285	1.70477	1.55816	1.61722	1.92621	2.3664	1.58004	1.6763	1.20916	1.75038	1.29244	1.69268	1.50718	1.36883	1.52081
Novel01033	0.343927	1.12906	0.519671	1.16746	0.893462	1.88456	0.383674	0.591981	0.422945	0.459191	0.50334	0.638327	0.593087	0.538644	0.45773
ENSGALG00000002069	3.67458	7.35661	3.88054	4.96859	5.2365	6.26244	5.65674	6.3476	4.37958	3.78808	3.17595	4.19366	5.98756	5.85169	4.61833
ENSGALG00000000789	1.67005	0.68106	0.647582	1.95657	0.408183	1.64767	0.763735	1.02127	0.0595289	0.627295	0.519525	0.193359	2.60167	1.30304	1.20666
ENSGALG00000016751	8.45164	13.3837	10.1451	17.3761	17.2639	15.7321	13.0241	11.9941	11.687	8.06008	12.3322	8.56164	8.48731	7.52437	7.79557
ENSGALG00000010225	0.887534	0.214064	0.71959	10.0738	2.09075	2.19378	0.466762	1.56382	0.831578	1.31443	1.67828	3.39888	0.881866	1.67464	1.64548
ENSGALG00000004400	14.6244	12.4852	9.80677	34.6227	35.3017	22.3117	14.4853	9.7565	11.6039	7.41797	7.59178	7.72619	10.8254	15.1837	12.1934
ENSGALG00000005974	19.9905	191.057	50.7568	82.2776	87.4457	217.856	138.421	60.8382	28.762	48.8795	51.8457	37.766	91.504	13.625	51.0723
ENSGALG00000007271	9.32831	17.9225	14.6384	12.1626	12.3244	17.4821	12.8675	11.3017	12.1235	10.3057	11.6685	9.90199	11.3707	10.8155	10.5625
ENSGALG00000026510	0.833592	22.2834	3.98755	4.39613	2.69448	16.6398	5.37033	1.08226	1.09345	1.18825	0.670982	0.739938	0.702773	0.508615	0.989482
ENSGALG00000012216	0.688689	0.861282	1.11674	0.176737	0.681093	0.298442	0.704254	1.32464	0.846916	0.594967	0.855471	0.7132	0.483842	1.12603	0.847758
Novel00309	0.339391	0.254668	0.440272	0.783877	0.572367	0.336935	0.594963	0.220317	0.389542	0.64505	0.546371	0.421764	1.14452	0.584694	0.644577
ENSGALG00000001655	0	0	0	0	0	0	0	0	0	0	0	0	0	0	0
ENSGALG00000004472	0	0.00836544	0	0.0137329	0.0167123	0.0442711	0.00781744	0.00964941	0	0.0154101	0.00797664	0.0237502	0	0.00640209	0
ENSGALG00000015606	0	0	0	0	0	0	0	0	0	0	0	0	0	0	0
ENSGALG00000019036	29.2204	75.4597	42.4595	51.3229	47.0507	90.0586	48.4524	29.5613	29.4522	37.4833	26.0206	25.0392	31.7265	36.4112	35.2355
ENSGALG00000029127	3.71531	6.54223	4.51842	8.2033	7.52015	6.41248	4.0553	4.01967	3.30455	5.57156	3.91844	3.92013	5.2081	2.18889	3.91085
ENSGALG00000021143	1.62011	9.42149	2.65993	3.64835	2.95993	7.35261	3.01761	2.1034	1.46104	2.16943	1.73876	1.61785	1.62196	2.2096	1.73078
ENSGALG00000021163	0	0	0	0.0665865	0.162066	0.245322	0	0	0	0	0	0.230315	0.0911447	0	0
ENSGALG00000012207	2.90404	5.09104	4.70905	9.2359	6.02474	8.26172	3.2121	2.95492	2.4942	2.86724	2.75187	3.19152	4.0805	2.80426	3.39241
ENSGALG00000005124	26.6828	35.9331	28.5227	30.6132	24.6155	32.8478	22.1466	32.82	25.5723	22.4721	33.1965	29.2754	23.4458	33.1976	25.5682
ENSGALG00000026721	0	0	0	0	0	0	0	0.0667085	0	0	0	0	0	0	0
ENSGALG00000024469	0.568047	0.266402	0.460558	0.728885	0.354809	0.805622	0.0829837	0.204861	0.0776174	0.0817905	0.169347	0.504227	0	0.203878	0.374599
ENSGALG00000025711	299.181	367.813	304.941	269.057	330.58	334.551	367.177	338.099	373.43	398.535	322.735	300.342	314.061	432.302	377.64
ENSGALG00000015117	0.0289283	0.135668	0	0.111357	0.0271035	0.123081	0.0253561	0.250385	0	0	0.0776174	0.0513564	0.0304856	0.0622961	0.0228921
ENSGALG00000023879	0.132561	0.683851	0.214954	0.0510283	0.186298	0.423004	0.290479	0.788812	0.217356	0.229042	0	0.235335	0.209545	0.38062	0.524503
ENSGALG00000003761	0.0235915	0.188087	0.133892	0.190709	0.287343	0.250937	0.165427	0.0638104	0.0483528	0.20381	0.210994	0.188469	0.472368	0.0846725	0.25203
ENSGALG00000002637	2.65736	3.14271	3.55964	13.2536	19.2684	10.8147	4.15208	1.50003	1.70499	3.69313	0.41333	4.92272	0.852299	1.74164	2.10288
ENSGALG00000003585	0	0	0	0	0	0.0442607	0	0	0	0	0.0558234	0	0	0	0
ENSGALG00000020876	14.2017	7.32787	7.43468	3.21129	4.07859	3.00476	8.69037	5.39032	7.43633	9.48059	9.23743	11.5336	8.39013	6.61796	9.2867
ENSGALG00000006220	0.271938	0.653608	0.744121	2.22446	2.11789	0.626715	0.744868	0.864257	0.724568	1.01314	1.09445	0.633637	1.16422	0.561208	1.93676
ENSGALG00000028539	0.106438	0.0748761	0.0647232	0.0204864	0.024931	0.113216	0.0699712	0.0287895	0.0654464	0.0229884	0	0.04724	0.14021	0.0955047	0.0210572
ENSGALG00000025847	0	0	0	0	0	0	0	0	0	0	0	0	0	0	0
ENSGALG00000007815	0	0	0	0	0	0.0161599	0	0	0	0	0	0	0.0480313	0	0
ENSGALG00000017358	290.787	205.998	287.55	360.353	370.45	273.568	199.096	186.913	267.331	252.115	231.403	272.6	274.98	305.749	259.688
ENSGALG00000025256	0	0	0	0	0	0	0	0	0	0	0	0	0	0	0
ENSGALG00000012929	13.9135	21.8521	16.637	19.6126	18.2642	21.7377	18.8633	14.8638	14.7303	14.1387	15.8456	12.9945	21.2817	15.3403	21.9414
ENSGALG00000021737	3.16765	0	0	11.584	5.1937	3.36935	2.08237	2.57036	1.29847	0.684144	4.24955	0.702941	0.834543	1.1369	8.77341
ENSGALG00000004663	1.91236	4.97958	2.95057	4.14222	3.67706	5.76843	2.73949	2.34696	1.76672	1.98501	1.55719	1.92553	2.90265	2.40741	2.33776
ENSGALG00000017210	12.4315	12.2209	15.6033	7.82234	6.9996	10.1716	15.2445	18.3643	15.9247	21.3246	17.6397	17.7194	21.2887	16.7747	19.8643
ENSGALG00000009089	43.6052	25.4238	38.5327	52.2483	57.2382	44.6155	45.3897	35.5568	49.4037	28.1293	42.058	44.5442	24.6396	54.9305	33.9182
ENSGALG00000004957	1.92239	2.62103	1.87999	3.20417	2.6924	4.20202	2.22351	2.42295	2.12847	1.57517	2.03837	2.46286	2.5689	1.50797	1.80356
ENSGALG00000008392	0.0289338	0.189971	0.0234588	0.144792	0.243978	0.287244	0.152166	0.0939124	0.0355814	0.124982	0.10351	0.192623	0.137211	0.135001	0.148827
ENSGALG00000009641	7.03749	422.368	42.3319	41.8308	44.0935	328.957	193.452	89.7136	18.8439	27.1501	38.2948	18.6435	52.9339	7.72871	27.339
ENSGALG00000003115	0.873928	1.8386	1.13899	0.811163	0.94889	0.99618	0.78033	0.901339	0.716476	0.924344	0.898487	0.775742	1.03287	0.644914	0.924254
ENSGALG00000028098	0	0	0	0	0	0	0	0	0	0	0	0	0	0	0
ENSGALG00000021512	0.250078	6.56775	1.08137	0.770125	1.09341	4.37424	2.26504	1.08226	0.273363	1.36829	0.745536	1.10991	0.966313	0.359022	0.329827
ENSGALG00000008674	1.98662	3.87347	2.32094	5.94929	5.62789	7.35433	3.40035	2.0986	2.06473	1.66222	2.28042	2.04113	2.68702	1.74045	2.07962
ENSGALG00000010490	0.0942831	0.147389	0	0.0725872	0.147226	0.0668577	0.110187	0.0340023	0.180358	0.135754	0.224863	0.0278968	0	0.0225595	0.02487
ENSGALG00000008486	25.7004	18.8804	28.0578	42.1713	48.9585	37.0403	31.2417	28.4438	24.7707	27.4726	30.4595	31.7288	26.7197	33.5543	34.8831
ENSGALG00000008953	18.602	17.3161	19.3879	17.2095	33.4222	32.6984	17.7458	20.1107	14.7092	19.3962	12.2641	18.9065	20.773	18.7889	18.5896
ENSGALG00000000921	30.2493	47.2006	30.6779	24.9054	39.8972	37.9226	31.1212	31.9867	23.6864	23.4363	27.4068	30.3835	29.0531	28.9682	28.5652
ENSGALG00000016449	0.786451	16.7203	3.47157	10.0913	5.56724	16.9164	4.05943	2.83626	1.21788	2.49123	2.11012	3.56803	3.6835	4.32808	2.83515
ENSGALG00000025997	0.372057	1.51222	0.201103	0	0.116196	0.527663	0.326114	0	0.305025	0.535708	0.332755	0.110085	0	0.0890235	0.196282
ENSGALG00000016691	43.7578	150.662	61.0267	110.053	117.049	203.857	115.724	64.8955	38.6451	59.5233	50.3668	46.9884	60.1967	49.1217	52.8976
ENSGALG00000023084	0.365147	0.47949	0.236842	0	0	0.103573	0.704125	0.553085	1.19744	1.00946	0.914409	0.0648245	1.23137	0.0524221	0.231164
Novel01253	0.27322	0.688724	0.263055	0.69678	0.783955	0.690217	0.134709	0.46188	0.223995	0.280296	0.229086	0.27284	0.575857	0.392247	0.364855
ENSGALG00000015489	0.345824	0.810921	0.560771	1.24248	0.972027	2.12532	0.60624	0.436513	0.567036	0.54773	0.515488	0.613941	0.36444	0.165493	0.501718
ENSGALG00000002948	47.0452	34.7866	45.9747	34.2455	31.452	32.0075	61.6709	69.0268	79.2405	41.0035	35.7829	39.6955	43.4826	41.5171	45.2973
Novel00319	0	1.09213	0.0786701	0.522918	0.318185	0.894479	0.212622	0.157469	0.0397746	0.125739	0.216952	0	0.0511271	0.0696508	0.0383922
ENSGALG00000024170	0	0	0	0	0	0	0	0	0	0	0	0	0	0	0
ENSGALG00000010875	0.32982	0.556844	0.187187	0.964912	0.247212	0.888748	0.260183	0.35684	0.0811194	0.341923	0.14749	0.351318	0.208545	0.142051	0.0522
ENSGALG00000001329	5.6267	16.0222	6.3827	9.32431	8.25043	15.1727	9.28877	7.72559	6.22647	6.21247	6.90535	6.56234	8.69498	8.34962	4.83201
ENSGALG00000016330	2.44903	6.87911	2.3218	7.7913	5.70601	12.6619	3.47547	3.37867	1.81658	3.224	2.34098	2.94452	3.45481	1.36731	4.31696
ENSGALG00000026293	9.04292	8.67914	9.71886	7.20488	9.75321	6.03966	5.43778	9.89749	5.9482	5.8138	7.14724	7.6536	14.1838	13.5862	12.5646
ENSGALG00000010362	4.62198	13.3794	3.87661	2.82218	1.7919	4.06865	9.5693	4.31088	0.261328	2.6161	5.34535	5.02227	2.68733	4.80503	2.7747
ENSGALG00000028045	35.22	55.7967	22.7225	35.2169	52.7167	20.178	44.9886	46.0051	36.5333	42.1154	53.3955	56.4259	44.9239	35.456	53.2778
ENSGALG00000007141	0.941622	3.45146	1.99902	2.09852	2.48416	3.56703	1.83531	1.67559	0.87355	2.08722	0.952964	1.4847	0.953142	1.36073	1.56872
ENSGALG00000008123	2.92493	3.45815	2.98924	2.51679	2.51013	3.27675	2.82228	2.6061	3.3249	2.63306	2.6819	3.83992	2.61614	1.97607	1.7311
ENSGALG00000002796	4.21323	9.66832	6.72454	7.18103	6.23151	11.0112	6.54978	6.16385	5.19208	4.53266	4.85832	5.36283	6.59024	6.61933	5.74555
ENSGALG00000019718	0	0.0878706	0.227867	0.252438	0.175546	0.265728	0	0.202715	0.0384022	0.0809338	0.209467	0	0.098726	0	0.0370675
ENSGALG00000008143	11.5736	7.77664	8.49186	17.1042	14.3629	26.3849	8.37954	19.0389	10.4872	10.1886	8.39885	8.60614	6.56193	10.9434	7.3778
ENSGALG00000010725	43.0844	104.921	60.0001	106.78	100.114	149.738	68.7531	48.4671	45.2238	42.7987	41.597	43.039	48.3196	32.2826	36.6663
ENSGALG00000006112	0.0156475	0.183459	0	3.65621	2.6169	2.18035	0.020573	0.0169294	0.0192426	0.0540725	0.0209919	0.0416686	0.00824495	0	0.0247651
Novel00081	41.3277	33.5295	41.1795	15.8777	18.1101	18.983	28.9228	40.9508	38.5895	54.9178	46.293	46.3044	52.7573	48.0693	51.9685
ENSGALG00000009939	24.9792	28.1633	23.2567	39.0033	24.6604	36.9666	26.7663	23.7769	27.759	21.5798	21.4263	25.9155	24.1022	21.7368	22.1937
ENSGALG00000028166	41.2848	52.4012	45.2958	29.14	31.0294	39.9841	44.708	50.3467	47.4491	44.5691	52.2264	40.5009	60.1042	50.8961	47.6976
ENSGALG00000022718	0.163492	8.51084	1.85577	1.19576	1.37861	3.42007	1.14642	1.14975	0.67018	0.847455	0.657995	0.798178	1.72293	0.997542	0.711576
ENSGALG00000010072	34.7648	21.7912	20.198	18.9208	13.3749	22.6277	16.4382	15.8083	20.3778	12.3811	15.4211	14.5599	14.3949	19.1683	19.3595
ENSGALG00000028847	2.6154	4.07578	2.80524	3.38739	3.10131	4.53996	3.47447	2.88861	3.09344	2.02411	2.76552	2.33365	2.18198	3.36366	2.18824
ENSGALG00000021758	0.987319	0	0	2.28037	0	0	0	0	0	0	0	0	0	0	0
ENSGALG00000017395	0.407998	0.467726	0.551324	0.488618	0.806995	1.06083	0.874174	1.47141	1.1893	1.17492	0.810887	0.965758	1.19434	0.911151	0.466361
ENSGALG00000001028	0.0353927	0.365166	0.0860866	0.544967	0.232121	0.501951	0.0930669	0.0382922	0	0.122305	0	0	0	0	0.0560154
ENSGALG00000008582	1.72781	1.94474	0.9424	0.943244	1.38335	1.80441	1.84488	1.25757	1.49378	1.0313	1.93864	2.23082	1.65529	1.42066	3.18204
ENSGALG00000025964	21.4009	23.4118	24.7265	21.4495	18.8157	20.9094	19.336	19.9686	19.9229	22.3229	18.59	17.4362	22.6455	21.0084	21.9777
ENSGALG00000003699	1.36529	2.59241	1.67392	2.84572	2.62074	4.60463	2.83122	1.58523	1.06471	1.29457	1.3402	1.53705	1.89499	0.932232	0.975006
ENSGALG00000009880	0.572664	1.25331	0.757544	1.11382	1.0919	2.17291	1.03912	1.30437	0.766009	0.946066	0.593039	1.09691	0.719955	0.872623	1.0415
ENSGALG00000016704	25.7873	26.0461	24.8096	22.112	20.1097	30.2215	26.2348	22.3588	27.8508	20.7883	22.1656	21.3595	26.6602	27.7291	23.4614
ENSGALG00000027579	27.7077	25.0638	33.0175	133.608	33.7201	38.2471	34.3119	24.8568	33.1439	34.7556	37.1271	30.7215	29.4071	23.9237	29.1829
ENSGALG00000004812	3.46687	14.5258	7.07347	7.23003	10.9938	15.8852	10.8361	6.47131	3.77927	7.12565	6.67833	6.0702	10.9605	4.48495	10.0544
ENSGALG00000016761	1.30391	1.11666	1.47086	1.65855	1.85904	2.29146	1.09321	0.736032	0.650689	1.37135	0.608437	0.855481	1.01564	2.84862	0.583212
ENSGALG00000003678	138.779	221.142	83.3537	27.8582	42.1451	53.7083	108.707	107.008	115.434	38.3401	51.4944	35.7408	37.6467	76.8278	43.036
ENSGALG00000015775	8.01993	22.0076	14.2407	19.799	15.8974	31.2083	15.3954	12.5493	13.8564	9.67702	14.7012	11.5314	10.2677	9.46793	12.3783
ENSGALG00000002869	1.746	6.16402	2.67393	1.88564	3.15811	3.43921	3.99603	3.67312	1.31214	6.4735	1.36636	4.88628	4.59997	3.69032	3.435
ENSGALG00000011036	288.479	281.211	294.589	265.306	268.61	287.929	322.816	243.665	306.111	267.182	289.129	264.781	297.662	265.587	268.216
ENSGALG00000009493	0.276073	2.00682	0.433677	1.81991	1.51962	3.38923	0.967929	0.672051	0.551689	0.402474	0.370365	0.413532	0.63642	0.284871	0.669057
ENSGALG00000026867	0	0	0	0	0	0	0	0	0	0	0	0	0	0	0
Novel01316	24.8265	28.9685	31.6858	27.9844	29.3815	29.9872	26.6544	21.334	33.9876	33.4546	26.9847	25.095	24.0348	40.3317	34.1223
ENSGALG00000000889	26.4263	37.3958	28.4746	32.4345	29.1012	37.3701	25.8822	28.3426	26.532	26.7012	27.2656	26.483	23.2478	25.1826	24.0036
ENSGALG00000003304	9.92383	12.4995	11.523	13.6705	16.9685	14.7529	10.3759	10.9669	8.68797	9.24694	9.57289	8.84034	8.59054	9.9984	9.8725
ENSGALG00000008932	0.145268	0.0454185	0.235559	0.1864	0.0907362	0.206024	0.0424432	0.157169	0.158794	0.167332	0.0433075	0.257894	0.153088	0.0695177	0.0766376
ENSGALG00000016387	5.50448	5.90054	6.96758	6.27025	6.44656	7.20918	6.17865	5.3781	6.60797	5.82293	5.27466	5.23505	6.00797	5.36239	4.93374
ENSGALG00000014408	27.3278	35.5399	26.5173	16.4509	19.2029	23.5017	25.9281	31.4538	26.4561	25.4297	33.8014	26.1284	34.2625	30.4334	26.3418
ENSGALG00000006000	2.23571	10.243	3.67179	6.80405	7.54621	13.9093	10.4095	3.49391	2.92169	1.63431	2.34134	2.44249	2.94004	1.35108	3.50061
ENSGALG00000001886	30.5246	16.3862	28.9512	22.3181	22.3037	20.9648	22.0437	20.7706	32.7373	32.1755	18.2001	20.2788	11.5319	17.777	22.94
Novel00516	0.395021	0.202098	0.116463	0.663537	0.403748	0.713022	0.220336	0.505088	0.618262	0.217168	0.0642351	0.573775	0.302754	0.103111	0.511521
ENSGALG00000010182	42.8466	31.0561	41.2542	46.8236	40.4562	42.3947	35.0423	43.9397	31.7921	48.5094	55.8854	50.375	56.7138	63.0683	55.8332
ENSGALG00000011570	41.8355	58.8599	47.2771	57.4905	61.6923	72.2915	49.9276	52.5023	40.3372	43.6233	52.101	45.3709	57.3613	46.9427	56.1558
ENSGALG00000019025	0	0	0.0408469	0	0	0	0	0	0	0	0	0	0	0	0
ENSGALG00000028963	0	0	0	0	0	0	0	0	0	0	0	0	0	0	0
ENSGALG00000004375	11.3018	16.5522	14.0942	16.1302	13.9315	20.7828	14.7124	9.4816	10.9342	11.9358	13.0204	12.54	15.998	11.9456	12.5058
Novel00881	0.889668	1.34592	1.72186	0.662848	0.645327	0.345965	1.15713	1.1799	1.27053	1.28926	0.539015	5.17135	1.7239	1.17424	2.81612
ENSGALG00000004642	0.0762524	0.214565	0.123647	0.117411	0.714423	0.540718	0.267346	0	0.375086	0.131751	0.136395	0	0	0	0.0603416
ENSGALG00000006525	0.0181397	0.518937	0.169133	0.0418966	0.0169955	0.752496	0.158998	0.0981288	0.0148716	0.0470134	0.00811177	0.0402543	0.0382325	0.00651055	0.122015
Novel01002	0.320099	0.36696	0.317202	0.355969	0.966368	0.655742	0.592319	0.211641	0.481119	0.322628	0.429429	0.205209	0.168666	0.255305	0.464397
ENSGALG00000000671	3.81547	6.58115	4.68078	9.40653	7.99306	10.8123	5.54881	4.37541	3.47952	3.27154	4.75439	3.91956	4.12628	3.76461	3.61868
Novel01239	0	0	0	0	0	0	0	0	0	0	0	0	0	0	0
ENSGALG00000009467	2.26322	2.1807	2.40213	2.20179	2.71804	3.22436	1.92965	2.38185	2.17595	1.54641	1.96894	1.75326	2.01646	1.43259	1.35137
ENSGALG00000025526	0	0.642405	0	0	0	0.485672	0	0	0	0	0	0	0	0	0
ENSGALG00000013861	1.24472	5.44831	1.88899	8.03491	4.96383	7.17436	6.26635	1.69199	1.8316	1.76464	1.88393	1.55816	1.31173	2.01607	2.67717
ENSGALG00000014399	0	0	0	0	0	0	0	0	0	0	0	0	0	0	0
ENSGALG00000015352	0.753642	1.8379	1.05403	1.39252	1.39455	2.2312	1.88265	1.54922	0.648754	0.813851	0.589777	0.535176	0.833923	0.554505	0.566568
Novel01205	0	0	0	0.406052	0	0	0	0.0815179	0.0617708	0	0	0	0	0	0
ENSGALG00000002144	23.3972	36.4142	28.7905	47.3443	49.1127	48.6361	30.1873	34.9093	25.4484	32.66	32.9008	37.1719	50.0953	42.483	41.6591
ENSGALG00000025949	0	0	0.61638	1.75589	0.71228	0	0.666359	0	0	0	0	0	0	0	0
ENSGALG00000004119	0	0	0	0	0	0	0	0	0	0	0	0.0556785	0	0	0
ENSGALG00000016662	0	0	0	0	0	0	0	0	0	0	0	0	0	0	0
ENSGALG00000000784	5.29963	8.50643	5.84003	12.0967	10.9097	15.2175	6.9351	6.37985	5.17095	4.73963	5.64104	5.2674	7.59078	6.02777	7.56068
ENSGALG00000009593	10.085	10.7266	9.6829	10.662	9.94614	12.2156	9.4318	9.57992	8.52517	9.17113	10.3791	9.03762	9.10237	11.2226	9.71809
ENSGALG00000010936	235.393	115.465	232.682	184.439	119.183	196.86	160.922	207.591	215.311	99.965	123.195	119.719	84.0102	158.016	83.6616
ENSGALG00000017096	2.3381	2.92405	2.92967	2.94557	2.85443	4.45478	2.98092	2.78516	1.93621	2.81564	2.19672	2.76722	2.68796	3.22105	2.20533
ENSGALG00000014450	127.215	328.712	140.764	223.776	199.946	337.31	204.476	153.316	138.759	155.518	159.37	147.378	151.613	129.858	133.869
ENSGALG00000015765	4.7626	7.43129	5.48535	6.67081	3.82273	6.77552	4.09647	3.45123	4.12349	3.67867	3.66238	3.67439	4.64373	3.4826	3.34617
ENSGALG00000007041	3.11832	2.46447	2.92623	3.11209	3.00277	3.93112	1.99933	2.09299	2.88791	1.74609	1.47193	2.10161	1.76481	2.61147	1.6908
ENSGALG00000008944	9.9607	11.4036	9.19226	12.8336	11.5008	14.1889	10.4255	8.46288	9.60721	8.22554	8.67269	8.08748	9.91032	10.031	10.1079
ENSGALG00000002910	31.3729	29.3299	29.3419	32.5217	31.9012	29.6189	28.401	23.6532	31.2224	25.9652	29.8815	25.7284	32.7146	27.9433	29.5508
ENSGALG00000018357	486.726	622.365	416.588	771.423	901.402	559.441	702.23	455.85	381.96	295.802	355.595	450.27	1017.41	460.616	521.276
ENSGALG00000025549	0	0	0	0	0	0	0	0	0	0	0	0	0	0	0
ENSGALG00000011582	0	0.0122922	0.0212508	0.0201791	0.0122786	0.00929315	0	0	0	0	0.0117209	0	0.0138107	0	0.0103707
Novel00222	1.05296	3.16042	1.98061	2.33469	2.32823	3.73335	1.6982	2.00502	0.725131	1.67378	1.50677	1.75716	1.68666	1.54191	1.96647
ENSGALG00000014067	21.5506	19.0202	22.6952	24.8567	22.5009	24.1916	23.9778	21.7674	23.014	20.885	26.1019	21.8118	23.8002	22.3766	27.2484
Novel00373	16.7528	22.0403	31.1104	36.4373	32.2209	32.8946	22.4381	27.0982	17.4062	23.1663	21.1149	25.4224	23.3648	22.8208	26.9082
ENSGALG00000025793	0	0	0	0	0	0	0	0	0	0	0	0	0	0	0
ENSGALG00000012570	4.60293	7.67642	6.73144	8.3377	7.32532	13.2467	6.69281	7.79581	5.81916	6.29927	5.48252	6.30051	6.21073	4.97928	6.40839
ENSGALG00000003187	16.3492	18.7596	16.8345	12.5031	13.6839	14.8396	20.6834	20.1059	21.6245	18.9265	22.4206	19.8335	21.4792	16.6257	20.9592
ENSGALG00000026423	11.3864	27.5431	15.5483	18.9166	17.4861	30.4759	16.5089	16.4874	11.0897	13.3131	12.5572	11.0951	16.9615	10.816	14.7014
ENSGALG00000009624	0	0	0	0.0166041	0	0.0152935	0	0	0	0.018632	0	0	0	0.0154813	0
ENSGALG00000027375	0	0	0	0	0	0	0	0	0	0	0	0	0	0	0
ENSGALG00000001981	4.4872	6.98771	4.54764	5.77987	5.22823	6.62906	6.2022	8.12246	5.07009	7.23127	6.58576	10.8258	6.88096	5.26512	7.44324
ENSGALG00000002973	34.8562	30.8752	30.8692	43.3811	41.1213	36.2712	32.6129	29.8569	33.277	36.5273	24.718	36.1029	30.1685	35.0287	36.1355
ENSGALG00000003969	21.9146	28.7649	21.0633	21.9879	22.1643	27.0539	23.808	18.5909	17.9487	18.0219	18.5033	17.8298	18.1083	19.4203	22.1241
ENSGALG00000003879	0.608838	7.53806	2.69852	9.03098	8.63254	9.46943	8.14715	1.09786	0.798634	2.59485	2.2507	1.22499	6.07394	3.52544	6.2955
ENSGALG00000021785	0	0	0	0	0	0	0	0	0	0	0	0	0	0	0
ENSGALG00000015459	0.404772	2.65762	1.19338	1.41649	0.999812	4.25327	1.87071	1.71192	1.32738	1.01727	1.48097	2.74371	1.55114	0.660351	1.48509
ENSGALG00000026339	0.245435	0.115104	0.0497482	0	0	0	0.215128	0.199156	0	0.0530087	0	0.0544651	0.193986	0.440447	0.194223
ENSGALG00000026143	0	0	0.555298	0.527293	0	0	0	1.48201	1.123	0	0.612548	0	0	0	0
ENSGALG00000026388	17.5709	66.9121	20.7993	32.3761	35.3396	77.5833	26.0794	26.6145	11.6202	34.6099	21.896	21.7316	34.6882	18.4988	18.3541
ENSGALG00000028612	8.74965	5.03761	7.90153	247.367	670.901	192.537	16.5208	9.57556	13.8814	13.7237	3.78866	13.2726	73.4066	20.9688	27.616
Novel00635	3.48977	9.16057	4.57815	5.13089	8.31031	14.4698	6.90362	4.06407	4.64917	3.70576	3.16447	3.50641	5.08228	5.07965	4.92868
ENSGALG00000025739	1.00361	4.05302	2.78015	2.21069	1.54105	3.9933	2.1992	2.59393	1.14277	2.72152	1.74532	2.17765	1.08702	1.16067	2.13992
ENSGALG00000005893	0.878531	2.06965	1.12641	2.06057	1.53137	1.98485	1.28938	1.54733	1.0385	1.51795	0.712637	1.45084	1.65787	1.09993	1.22876
ENSGALG00000016289	5.39128	4.5362	5.68826	8.07088	6.83912	7.42055	5.30496	5.80933	6.02024	4.6576	5.9819	6.86974	7.35408	6.90061	8.00709
ENSGALG00000027506	1859.67	1160.03	1467.61	782.77	717.795	565.007	1185.92	1550.9	1632.21	1693.54	1586.24	1898.04	1393.82	2028.21	1399.37
ENSGALG00000026130	0	0.33321	0	0	0	0	0	0	0	0	0	0	0	0	0
ENSGALG00000026698	0	0	0	0	0	0	0	0	0	0	0	0	0	0	0
ENSGALG00000025245	0	0	0	0	0.691534	0	0	0	0.605114	0	0	1.9655	0	0	0
ENSGALG00000009496	1.41049	2.22415	1.59109	1.90429	1.9727	2.75419	1.89927	1.52604	1.35748	1.43047	1.682	1.70566	1.40026	1.55541	1.35883
ENSGALG00000015087	1.02045	2.4954	1.0342	1.71155	2.59507	1.57645	2.45971	0.867466	0.478057	1.38534	2.37942	1.4881	1.88192	1.62197	1.32665
ENSGALG00000010582	47.1888	38.215	44.7624	32.8447	39.3713	37.5797	45.8041	50.0963	49.8614	47.101	34.7666	50.2296	49.3142	45.07	53.9693
ENSGALG00000016109	0.0401286	0.0188195	0.113873	0.0617889	0.0751945	0.170735	0.0879333	0.043416	0.0328988	0.104003	0.0358896	0.0356201	0.0634332	0	0.111144
ENSGALG00000006746	0	0	0.165694	4.40545	3.06357	1.01443	0	0	0.33509	0.353106	0.182776	0.725616	0.215366	0.586789	0.161722
ENSGALG00000000495	0	0	0	0	0	0	0	0	0	0	0	0	0	0	0
ENSGALG00000002452	28.4775	16.6248	39.5281	71.7543	63.928	58.5945	22.5248	16.0461	15.465	33.144	18.1953	31.0212	47.6567	18.4467	35.4437
ENSGALG00000007977	30.2999	36.316	33.4954	28.4546	28.3345	37.4321	34.2655	32.439	36.1623	28.5924	35.7884	28.9941	38.6757	35.8636	32.4871
ENSGALG00000027464	0	0	0	0	0	0	0	0	0	0	0	0	0	0	0
ENSGALG00000003604	1.75831	3.73244	1.61317	2.52927	2.42773	3.14992	1.70341	2.1026	1.21391	1.87879	1.7381	2.71079	2.48687	2.7568	3.44193
ENSGALG00000002279	2.63101	7.33282	3.3521	5.05429	4.78922	8.08466	3.6239	3.95805	2.38296	3.11721	2.64442	2.58008	3.32717	2.2843	3.29158
ENSGALG00000013795	3.06621	3.80831	3.59925	6.94572	7.18988	7.81315	4.1569	2.80703	3.88118	2.65622	3.52583	2.93109	2.43234	2.52752	1.81981
ENSGALG00000016086	0	0	0.029102	0.221075	0.201779	0.279984	0.755081	0.0388345	0.0294272	0.0310093	0	0.0318613	0.0378263	0	0.0852132
ENSGALG00000006804	0.0536133	0.176005	0.0652024	0.10319	0.100463	0.0950451	0.0939857	0.0290027	0	0.0231586	0.0239749	0.0475898	0	0.0577272	0
ENSGALG00000008246	0	0	0	0	0	0	0	0	0	0	0	0.131544	0	0	0
Novel00071	0.675765	0.760608	0.383526	0.572288	0.50651	0.670875	0.236928	0.87735	1.10803	0.175141	0.906571	0.479874	0.284857	0.388063	0.106952
ENSGALG00000008098	195.15	159.768	198.66	35.62	31.5385	51.526	301.031	148.352	163.679	69.4784	141.291	141.722	70.1147	112.904	78.3495
ENSGALG00000025231	0	0	0	0	0	0	0	0	0	0.781878	0	0	0	0	0.716197
ENSGALG00000002883	2.49622	3.84817	2.41462	3.31084	3.39236	4.01342	3.07617	3.64998	3.5459	2.42342	2.74093	2.53388	1.94039	2.65228	2.27851
ENSGALG00000000337	0.724034	1.45524	0.419306	1.27411	1.16291	2.42043	0.997272	0.223814	1.27197	0.625503	0.277522	1.19356	0.109002	1.70768	1.39147
ENSGALG00000001714	3.40652	5.84484	3.57029	5.43717	6.53896	6.59877	4.80652	4.94408	4.42758	4.0914	4.9044	4.94133	3.50235	5.18876	4.1422
ENSGALG00000026683	0	0.0493019	0.0852335	0.283273	0.0492473	0.0124244	0.0460723	0	0.0287286	0.0605465	0.0156702	0	0	0	0
ENSGALG00000010752	1.31887	1.63467	0.763792	2.10329	1.80938	1.77026	0.206431	1.27403	0.73371	0.976621	1.39019	0.501727	0.0992765	0.371924	0.559113
ENSGALG00000024097	0.146255	0.219491	0.0948642	0.24772	0.438495	0.352621	0.025639	0.0316474	0	0.252704	0.156967	0.0519294	0.154129	0.0209971	0.0694427
ENSGALG00000014477	0.735088	3.19339	1.16061	0.536148	0.978705	2.52401	1.55992	1.25575	0.253748	0.935867	0.726641	0.446448	1.38623	0.999782	0.857249
ENSGALG00000028597	20.8432	31.8954	29.523	27.5865	29.5649	33.4763	20.0526	29.828	20.4579	21.4861	24.88	18.7594	25.8594	18.9852	19.6483
ENSGALG00000007349	5.38521	3.3674	6.37228	11.803	12.7728	9.94248	6.93149	7.03364	7.39807	11.2746	11.2381	9.86181	6.74878	6.99991	10.7114
ENSGALG00000002118	0.627684	7.27269	2.09551	1.42131	1.34915	8.84965	1.68289	0.639157	0.78703	1.11643	0.462312	0.950455	0.311282	0.954138	0.759676
ENSGALG00000023157	60.8303	65.2303	63.8693	67.4458	73.3229	60.4551	70.0028	77.6614	78.0259	85.1434	50.3024	65.7011	56.3713	62.7612	72.365
ENSGALG00000015744	4.78608	22.4829	7.66467	22.078	11.4884	26.3658	11.6145	5.04978	5.25335	6.0142	4.7404	5.16124	6.87782	4.99717	5.79069
ENSGALG00000022456	0	0	0	0	0	0	0	0	0	0	0	0	0	0	0
ENSGALG00000014540	30.6368	24.2461	26.9985	23.2413	21.0516	20.2187	26.0669	29.327	30.1209	25.4078	23.253	26.2121	16.7736	29.036	25.4279
ENSGALG00000018702	16.6605	35.5018	46.8187	47.6953	37.4326	37.9661	39.698	52.676	43.2309	58.4113	61.9169	41.2073	56.0813	28.0985	26.6242
Novel01422	21.4487	31.2946	32.075	14.1278	12.9505	18.2515	19.009	24.495	25.595	20.5886	28.3481	28.9814	17.5803	33.0166	25.4598
ENSGALG00000025885	0	0	0	0	0	0	0	0	0	0	0	0	0	0	0
ENSGALG00000026858	70.4566	132.171	94.0297	432.591	439.003	374.848	329.58	129.346	133.782	15.8428	40.8002	41.2541	28.484	49.3638	68.7321
ENSGALG00000027348	0	0	0	0	0	0	0	0	0	0	0	0	0	0	0
ENSGALG00000004165	13.0535	19.198	14.4782	18.5987	15.0675	22.3636	13.913	14.0099	12.9277	11.3974	10.585	11.865	14.6366	11.8688	12.3682
ENSGALG00000025530	0	0	0	0	0	0	0	0	0	0	0	0	0	0	0
ENSGALG00000002497	13.8859	14.9552	13.6628	13.8064	11.7351	14.3248	14.4648	15.6652	11.9276	12.7497	12.9807	13.5027	13.0524	16.2537	15.1023
Novel01038	0.3103	0.776131	1.25792	1.51301	0.872179	0.660117	1.08793	0.111907	2.28955	0.982933	1.01758	1.28538	0.654009	0.668221	0.245553
Novel00573	1.47099	1.31702	1.68054	0.154431	0.501164	0.237069	2.69591	1.30214	0.986703	2.71491	2.69101	3.20496	0.422777	0.431964	1.74608
ENSGALG00000002846	3.90187	5.31261	3.91191	3.61772	6.48599	13.5666	4.26587	3.0867	2.51096	4.60324	3.00189	3.4635	4.77513	5.33065	5.611
ENSGALG00000006348	31.6091	24.7801	27.6367	46.7433	77.6788	72.3294	23.0654	27.2855	23.0705	28.9298	25.1912	22.4324	39.4947	26.6024	24.9517
ENSGALG00000027634	0	0.0637618	0	0.0872273	0.0212304	0.0803421	0	0	0.0185773	0	0	0.0402279	0	0.0325314	0.0358632
ENSGALG00000027300	76.547	89.2258	78.188	196.744	284.054	224.453	87.8538	84.3751	67.4759	69.4082	65.5353	54.3575	82.5982	59.0799	89.9819
ENSGALG00000001252	0	0.192462	0.0415911	0	0.144186	0.254634	0	0.111001	0	0	0	0.0910693	0	0	0.0405942
ENSGALG00000026428	106.509	66.3238	52.7154	52.2967	52.7395	74.7199	70.073	115.645	107.024	50.1599	61.2049	79.6089	39.1916	94.5239	51.652
ENSGALG00000026676	0	0	0	0	0	0	0	0	0	0	0	0	0	0	0
ENSGALG00000027312	17.8811	10.7818	19.6988	10.4812	10.7699	11.6506	19.2605	19.5658	32.2462	18.9836	19.3153	21.6438	17.8036	20.8992	26.784
ENSGALG00000011934	16.5047	24.6855	16.5333	22.4208	24.9567	26.5707	19.8846	18.6152	21.0542	18.9381	13.1654	20.3069	22.4298	17.2451	23.7516
ENSGALG00000003047	4.61541	5.69721	7.3076	6.2351	6.58838	7.54919	6.86968	6.3361	7.65698	5.22864	6.54227	5.7588	8.05291	8.36074	6.02984
ENSGALG00000014877	0.943358	3.69547	1.57469	3.27537	3.91667	6.62392	2.28605	2.64166	2.13822	1.82172	1.81976	2.67631	3.46975	2.07132	1.50767
ENSGALG00000015463	0.355527	1.16714	0.624548	0.410573	1.11033	1.42862	1.09069	0.769305	0.582947	1.17739	0.317971	0.683765	0.749333	0.340274	0.89092
ENSGALG00000028598	0	0	0.0174316	0	0	0.0152459	0.018845	0	0	0	0	0	0.0226573	0	0
ENSGALG00000025594	0	0	0	0	0	0	0	0	0	0	0	0	0	0	0
ENSGALG00000016271	103.864	91.9718	121.142	35.1133	34.984	40.8633	96.2044	126.024	111.001	126.956	101.849	141.543	111.053	102.201	130.963
ENSGALG00000018247	0	0.720273	0	1.18241	1.43895	1.08908	1.34618	0.830824	0.629563	0	0	0	0	0	0
ENSGALG00000028262	5.67673	8.039	4.64767	9.42642	14.0787	12.6289	4.5367	5.359	4.24333	6.73125	6.32144	5.97757	8.38698	4.51433	4.49222
ENSGALG00000023988	9.05425	7.99	13.6829	6.39329	6.92703	8.58602	7.9362	7.59334	7.77437	6.80383	11.404	6.80054	8.86415	8.38377	5.80831
ENSGALG00000014445	20.572	22.3061	27.6838	28.8182	16.7744	29.8066	23.1158	18.0736	25.5838	18.1733	22.0648	20.1486	13.8553	16.488	16.004
ENSGALG00000020726	15.6527	3.01841	12.5447	4.34066	10.2995	9.21921	2.32424	3.67667	5.08661	6.40542	10.6376	9.80356	2.17043	4.93416	3.44298
ENSGALG00000009781	4.758	6.83122	5.24507	8.98909	11.174	11.4316	5.55147	5.18165	4.77331	5.86827	4.00342	5.39043	5.01413	5.52755	5.22668
ENSGALG00000018346	0	0	0	0	0	0	0	0	0.716399	0	0	0	0	0	0
ENSGALG00000011052	0	0	0	0	0	0	0	0.160822	0	0	0	0	0	0	0
ENSGALG00000013268	0	0.0146823	0.00423048	0.0160685	0.00488867	0.00370004	0.018294	0	0	0	0	0	0	0.00374546	0
ENSGALG00000001774	1.86725	1.99198	2.62856	3.0647	2.88372	2.81552	2.39206	1.79821	2.34672	2.52607	2.2756	2.41334	2.11913	1.89269	2.44377
ENSGALG00000027610	0	0	0	0	0	0	0	0	0	0	0	0	0	0	0
ENSGALG00000006145	1.92009	1.96981	1.70271	1.29347	1.85519	2.17	1.26224	0.843939	0.491924	0.829396	1.18062	1.22501	1.39112	1.07678	0.522309
ENSGALG00000015607	11.0275	9.94981	9.93692	6.17132	8.04368	11.1772	8.2868	8.52667	9.85141	8.21943	9.17917	8.47186	8.82636	9.23864	8.5012
Novel01009	0.137227	0.171617	0	0.140865	0.0428568	0	0.160375	0.098979	0.150004	0.316139	0.531833	1.46171	0.289228	0.985043	0.398174
ENSGALG00000016910	10.8034	15.9413	11.03	13.8036	13.835	18.8751	12.7259	12.7603	12.2935	10.4196	13.0192	11.1287	12.5897	9.65599	11.9567
ENSGALG00000002618	0.384673	0.664646	0.541692	0.717006	0.625971	0.875761	0.354918	0.416186	0.564343	0.489741	0.380253	0.395369	2.24027	0.319726	0.608815
ENSGALG00000027963	150.993	101.968	157.189	153.63	168.943	93.0777	237.847	272.126	227.571	171.049	133.74	147.267	150.76	130.301	136.533
ENSGALG00000026981	0.304648	0.7923	0.482775	0.852889	1.08983	1.08997	0.788949	0.344588	0.261114	0.323005	0.247697	0.405631	0.350235	0.437366	0.372579
ENSGALG00000010485	11.5144	7.61368	12.0899	10.4615	11.5251	12.5265	10.2493	7.46686	13.2803	9.54583	10.0422	7.20531	12.2473	9.90807	11.7152
ENSGALG00000012577	1.036	0.831084	1.14943	7.25191	4.1125	3.15125	1.03951	0.471947	0.402324	1.86069	1.80436	1.86342	0.847562	0.146776	1.81226
Novel01454	140.291	92.6256	134.926	52.2944	56.297	48.9076	101.671	125.78	149.713	135.192	127.107	144.704	127.47	164.089	153.812
ENSGALG00000021842	0	0	0.259529	0	0.149954	0.226988	0	0.173161	0	0	0.286286	0.284136	0	0.114887	0.253307
Novel01330	47.3424	69.1945	44.9429	30.6802	56.3278	52.9644	34.3251	36.3021	37.9462	28.5901	62.1144	29.4572	51.0535	44.2444	35.8635
ENSGALG00000008437	11.1043	16.3074	13.8355	22.4484	21.2479	25.4992	13.8518	14.5291	14.3753	15.7037	11.9883	11.7007	10.6074	11.6634	14.5411
ENSGALG00000008783	322.245	325.016	289.186	268.693	261.299	329.709	336.179	298.821	344.88	289.771	299.799	310.069	307.13	305.987	303.593
ENSGALG00000000300	7.90059	8.36741	5.3875	8.4189	7.08358	8.25525	6.67276	6.73636	5.8552	4.31674	5.4048	4.48179	6.36849	6.59138	5.03063
ENSGALG00000009230	1.10148	3.5809	1.6994	2.58521	2.90563	3.89022	1.77158	1.68923	1.17482	1.11788	1.20511	1.40489	1.46506	1.2666	1.55712
ENSGALG00000029141	0.0452791	4.03464	0.0367112	0	0.0848457	0.160541	0.0396878	0	0.0371213	0	0.688433	0	0	0.0650047	0.60913
ENSGALG00000014999	0.0593239	0.658447	0.104213	1.49197	0.926362	1.65466	0.658646	0.288827	0.0243179	0.128127	0.353715	0.1492	0.270909	0.0993627	0.266024
ENSGALG00000015025	3.72135	4.40053	5.47672	5.21943	3.33701	5.85254	4.47828	3.48141	3.43351	2.18572	2.91084	3.5649	2.64034	2.86522	2.93513
ENSGALG00000008920	3.07003	5.53179	3.76641	5.78453	4.84441	5.8149	3.15122	3.10301	2.81497	2.33816	2.27606	3.11953	3.57585	2.92865	2.5573
ENSGALG00000002402	10.1144	8.21581	6.96778	7.60884	7.09183	8.95368	9.44491	8.22516	6.85594	9.16633	9.07557	7.48174	5.5733	7.49764	8.03012
ENSGALG00000024495	0	1.00432	0.868141	4.1218	2.00642	1.51858	0.938533	0	0.877841	0.925039	0	0	1.1284	3.07445	0
ENSGALG00000007972	0	0	0	0.0177901	0.0649495	0.0491577	0.0405081	0	0.0568329	0	0.0206665	0.0205113	0	0	0.0365718
ENSGALG00000004129	0	0	0	0	0	0.0643312	0	0.0981522	0	0.0783744	0	0	0	0	0
ENSGALG00000020391	0	0	0	0	0	0	0	0	0	0	0	0	0	0	0
ENSGALG00000003200	0.516627	1.37917	0.676633	1.10144	1.60105	1.63448	0.452831	0.515953	0.228064	0.686647	0.604223	0.917167	1.00512	0.684639	0.691862
ENSGALG00000014486	13.3544	12.2706	16.0883	19.064	15.8066	19.6521	19.3743	15.6033	18.2072	10.6509	11.4195	9.02985	7.38957	10.758	9.29242
ENSGALG00000016504	5.60149	7.56927	6.5814	9.18235	9.65124	11.5376	7.85359	6.62532	7.66679	6.05925	6.52757	5.97291	5.29022	4.97498	6.69598
ENSGALG00000006088	6.95908	10.2024	7.39656	8.19413	7.28717	9.78666	7.3812	6.76994	5.65735	4.69849	5.43943	5.29477	6.6558	7.22022	5.09051
ENSGALG00000016391	0.0975162	0.256105	0.237191	1.39642	1.44356	1.02342	0.170949	0.527524	0.223852	0.168491	0.156987	0.207744	0.123319	0.349996	0.216072
Novel01495	4628.19	3690.61	3677.2	1227	1156.52	1277.16	3086.95	3653.16	4844.26	3890.33	5755.01	4610.11	3830.82	5856.91	3520.97
ENSGALG00000016438	0.068862	0.409068	0.037221	0	0.10753	0.455757	0.0603586	0.0248344	0	0	0	0.0407502	0.072569	0	0.0181644
ENSGALG00000005445	0.046755	0.350834	0.0758155	0.071992	0	0.198928	0.0819629	0.202341	0.0766627	0	0.125448	0.124506	0.147816	0.167809	0.184995
ENSGALG00000027055	0	0	0	0	0	0	0	0	0	0	0	0	0	0	0
ENSGALG00000018503	1.10882	0.650018	1.29232	0.266771	0.454508	0.343999	1.57934	2.32434	0.90905	3.05339	1.98338	2.21455	1.38761	0.795937	1.37102
ENSGALG00000004032	0.256521	1.09367	0.548314	0.736107	0.852114	0.992201	1.0629	0.681225	0.726508	0.684983	0.563131	0.600303	0.98302	0.318054	0.553625
ENSGALG00000002992	0.0544777	0.204391	0.0662537	0.0629124	0.0510412	0.270417	0.0716258	0	0	0	0	0.0241785	0	0	0
ENSGALG00000016755	0.0216962	0.0203502	0	0.116925	0	0.0307703	0	0	0.0355746	0.0187437	0	0.0192587	0.0685926	0.015574	0
ENSGALG00000010093	6.01563	7.95934	6.07898	10.8289	9.36637	12.4882	8.07476	6.16258	6.48046	5.6991	5.01629	5.98467	6.92135	5.4029	6.71517
ENSGALG00000001711	10.9183	9.76678	8.93424	7.31619	7.67216	11.6135	10.2789	9.18768	8.45389	13.6246	8.22786	7.35844	8.52299	8.99848	7.44007
ENSGALG00000014769	0.833831	3.1624	1.67543	3.32142	2.68336	4.1904	2.22437	1.21593	1.96164	1.72259	1.42665	1.41594	2.2159	1.09299	1.0328
ENSGALG00000025559	0	0	0	0	0	0	0	0	0	0	0	0	0	0	0
ENSGALG00000018259	0	0	0	0	0	0	0	0	0	0	0	0	0	0	0
Novel00675	0	0.0146602	0.228101	0.914523	1.5669	0.565252	0	0.0338205	0.0256278	0.0675142	0.0419364	0.0277477	0.0329425	0	0.0371056
Novel00761	0.809215	1.27833	0.483436	1.34438	1.31682	1.84229	1.30659	0.829428	1.6411	0.919857	0.876098	1.4744	1.21184	0.733733	0.977398
ENSGALG00000006635	0	0	0	0	0	0.0976623	0.0804781	0	0	0.0396605	0.0410585	0	0.0483793	0.0329537	0
ENSGALG00000014852	25.1072	40.3571	26.699	51.5286	32.1058	48.1725	30.2118	26.5853	21.406	34.1097	21.0497	26.8564	28.8545	24.7659	27.6992
ENSGALG00000028625	0	0	0	0	0	0	0	0	0	0	0	0	0	0	0
ENSGALG00000004267	0	0	0	0	0	0	0	0	0.0337998	0	0.073745	0	0	0	0
ENSGALG00000009895	0	0.0354938	0.0920429	0.174802	0.283635	0.201255	0.099506	0.0204708	0.0465356	0.0163459	0.0846103	0.285515	0	0.176563	0.119782
ENSGALG00000003361	0.220678	0.896943	0.357841	0.481375	0.206757	0.625946	0.32238	0.358135	0.241226	0.317744	0.164472	0.163237	0.426356	0.343216	0.261947
ENSGALG00000007944	1.36042	2.07166	1.94646	8.44057	7.37772	6.5032	1.71149	2.28573	1.49584	1.61775	1.76066	1.84688	2.27699	2.06797	2.12778
ENSGALG00000017199	1.99723	4.06893	1.72378	3.33982	2.29378	3.89854	2.39061	1.48703	1.53176	1.28016	1.03718	1.3344	1.74264	1.04826	1.13863
ENSGALG00000025287	2.88697	17.1498	0	11.1132	9.91782	13.648	7.59143	0	0.788946	4.15682	10.328	4.27103	1.01413	0.690777	0
ENSGALG00000026812	1.10095	2.60879	1.40941	2.67665	1.62869	2.83518	1.11737	1.37922	1.90021	1.3516	2.28025	1.59448	1.64873	2.24608	1.83416
Novel01810	0.652563	0.748094	1.20513	1.33973	1.56246	0.951194	1.87483	2.86331	1.39693	1.15884	0.58363	1.51248	1.29897	0.754683	1.17624
ENSGALG00000001410	0.385417	1.67196	0.937461	0.890183	0.902762	2.3231	0.802333	0.208496	0.276481	1.04052	0.904848	0.38488	1.11696	0.484157	0.953114
ENSGALG00000015520	55.2087	46.0437	51.2443	57.0508	27.3696	40.5114	117.22	72.4413	99.1296	44.3383	69.2712	51.5435	45.4243	34.532	42.275
ENSGALG00000023480	0.262452	1.72318	0.531974	2.92984	2.17208	2.66756	0.843492	1.04116	0.681363	0.906943	0.665062	1.126	1.10632	0.219793	2.14612
ENSGALG00000009328	57.2062	65.8997	56.9759	65.8357	56.5198	80.3245	61.6864	55.9752	61.6602	53.3672	58.2494	46.3966	40.7201	48.5126	40.8713
ENSGALG00000010738	1.3953	0.731354	3.17756	1.26379	1.15349	1.90611	2.62587	2.17562	1.11027	7.17935	0.256923	4.37132	1.49204	1.414	0.893071
ENSGALG00000006569	6.32378	14.2095	6.66633	12.7087	15.2774	15.6816	9.04714	6.31135	6.80265	5.45233	6.87012	6.04852	5.40555	5.19814	6.20807
ENSGALG00000006464	123.459	75.4782	124.907	37.4165	50.0977	54.285	70.2554	106.996	97.3096	106.749	90.3415	115.133	59.0271	119.479	134.733
ENSGALG00000019261	0.610904	0.986838	1.67854	2.87422	1.7171	3.32121	1.45766	0.69767	0.473015	1.37806	0.546371	1.23517	1.00145	0.633418	0.644577
ENSGALG00000013576	0	0	0	0	0.0668807	0	0	0	0	0.0616693	0	0	0	0	0.112978
ENSGALG00000027314	0.166354	0.0520109	0	0.0853822	0	0	0.145812	0	0.318226	0.19162	0	0	0.0584363	0	0
ENSGALG00000025121	0	0	0	0	0	0	0	0	0	0	0	0	0	0	0
Novel00680	15.3698	7.2081	23.5847	4.08992	4.15577	3.03561	7.68528	21.372	14.4612	30.5219	17.2519	28.7967	16.1972	24.472	19.0195
ENSGALG00000010203	3.53041	15.3222	3.56584	16.4693	9.19432	17.6516	7.02811	3.43119	1.74152	2.99828	2.19418	3.08066	2.68	2.4483	1.94143
ENSGALG00000025943	0	0	0	0	0	0	0	0	0	0	0	0	0	0	0
ENSGALG00000001716	45.3385	39.8917	72.2767	6.68235	11.7677	9.48577	37.01	67.3369	51.4018	74.4995	64.2484	65.4882	97.0648	81.289	95.3518
ENSGALG00000027162	0	0	0	0	0	0	0	0	0.0415512	0	0	0.0449882	0	0	0
ENSGALG00000008891	0	0	0	0	0	0	0	0.0659067	0.0499413	0	0	0.108145	0	0	0.0482056
ENSGALG00000007513	12.5499	25.1272	17.4804	19.0763	17.4867	23.5034	14.7375	20.7152	15.2354	21.3366	17.8436	18.5666	21.2795	19.4609	27.502
ENSGALG00000025791	0.0429633	0.0503723	0.0261252	0.0578845	0.100633	0.045699	0.037658	0.0464829	0.0176114	0.0278374	0.0480311	0	0.0339571	0.00771	0.0169993
ENSGALG00000028900	1.43171	4.39794	1.16079	2.14939	1.14018	3.04574	2.66669	2.05242	1.43786	1.91715	1.15242	2.50994	1.3579	2.38943	1.95437
ENSGALG00000028422	24.9201	23.2211	21.5097	72.8207	55.5735	54.6609	25.6292	25.9475	14.8341	28.6053	18.2784	24.5078	22.1602	21.8081	19.3494
ENSGALG00000028504	0	0	0	0	0	0	0	0	0	0	0	0	0	0	0
ENSGALG00000026562	930.049	592.027	787.023	205.797	197.345	245.124	730.081	976.877	808.684	804.8	798.758	876.303	594.41	1405.91	885.373
ENSGALG00000025318	0	0	0	0	0	0	0	0	0	0	0	0	0	0	0
ENSGALG00000012365	2.65609	10.9369	3.25257	4.23401	4.89447	8.55769	5.29378	3.49372	2.2408	3.01825	2.36565	2.5729	2.46225	2.23887	2.16292
ENSGALG00000007957	5.448	9.98702	5.46432	12.1496	10.1621	12.764	7.18466	6.64677	5.57968	5.2073	4.96136	5.21808	5.51442	6.16915	5.28092
ENSGALG00000028909	1.34231	5.03613	4.25431	1.9729	2.85826	3.28822	1.17656	2.6405	1.10047	0.632531	2.61931	3.79114	3.98652	3.50378	2.22101
ENSGALG00000027833	0	0	0	0	0	0	0	0	0	0	0	0	0	0	0
Novel00042	14.8533	17.8267	20.5892	29.2648	44.7419	31.485	25.1284	32.6587	32.7346	51.535	14.4985	26.6527	38.2067	35.9988	25.5303
ENSGALG00000018370	9160.95	7425.94	7747.29	10434.3	14293.3	11265.4	8245.99	6522.53	8011.36	7300.89	7179.21	7569.66	10638.7	7704.86	8971.04
ENSGALG00000006928	7.00894	13.7618	9.69843	8.77763	9.4562	13.7839	7.94552	8.54365	4.9417	7.34687	6.51929	7.4243	7.43549	6.90947	8.1348
ENSGALG00000011862	0	0	0	0.0208364	0	0	0	0	0	0	0	0	0	0.0194273	0
ENSGALG00000026958	1.1716	3.37813	2.39234	3.74161	4.14683	5.23095	3.42308	3.33325	2.27678	1.12462	2.13448	2.07993	2.01205	2.4607	1.75125
ENSGALG00000006793	0.11066	0.20759	0.134581	0.234288	0.466559	0.863181	0.412231	0.568697	0.113404	0.262902	0.247427	0.319239	0.262389	0.158869	0.503527
ENSGALG00000026468	4.42404	9.90072	4.87692	8.69428	7.88998	12.8238	6.80305	3.86276	4.16784	3.35262	2.77663	3.06581	2.69917	3.81638	2.8253
ENSGALG00000004487	0.0227581	0.0320193	0.0276776	0.0525635	0	0.169451	0.0498697	0.0492451	0.0279869	0	0.0305311	0	0	0	0.0180094
Novel00487	0.0678782	0.955004	0.330204	0.287422	0.317982	1.10707	0.208237	0.110158	0.0556489	0.117282	0.15177	0.0903781	0.214597	0.0730867	0.10743
ENSGALG00000004339	0.293116	0.47488	0.32407	0.164121	0.224694	0.151166	0.65398	1.03787	0.589843	0.207185	0.619633	0.662287	0.842441	1.12854	0.991078
ENSGALG00000007320	0	0.700232	0	1.24531	0.349728	0.970549	0.10906	0.403854	0.204016	0	0.667688	0.220891	0	0	0.196925
ENSGALG00000025103	0.628294	0	0.509405	1.93486	1.17732	0	0	0	0	0	0	0	0	0	0
ENSGALG00000025758	0	0	0	0	0	0	0	0	0	0.602548	0	0	0	0	0
ENSGALG00000004645	5.03051	5.66209	6.21988	1.35552	0.353489	13.0203	0.936981	0.340164	6.65025	0.543241	3.43057	4.85605	0.132533	0.315963	1.94066
ENSGALG00000008761	0	0	0	0	0	0	0	0	0	0	0	0	0	0	0
ENSGALG00000001749	10.2716	27.6854	15.6588	42.2577	44.7042	68.1702	17.2678	9.58534	5.69492	18.023	9.41063	10.0273	17.4249	8.84456	16.2387
Novel00932	1.99695	0.566274	3.08755	5.07709	6.5702	2.79921	1.66895	6.18017	2.39865	1.44435	2.69978	3.79253	1.27246	0.666725	1.35977
ENSGALG00000024343	0	0.0877085	0.530709	0	0	0	0.0819629	0.202341	0	0	0	0.166008	0	0	0.0739982
Novel01247	8.63904	14.7102	11.638	17.4463	19.1768	20.3575	16.2512	12.9417	11.1142	11.1951	11.2925	10.8538	12.7458	12.5457	11.0435
ENSGALG00000012227	2.29301	3.60207	2.87181	2.94226	2.4453	4.91769	2.45105	2.54137	2.88861	2.72181	2.28421	3.5247	2.37716	1.81994	2.56693
ENSGALG00000024248	5.75936	33.647	10.4731	7.47455	10.9463	41.5407	14.3512	8.54562	5.05899	13.363	5.37173	8.54484	6.15611	5.13822	4.94827
ENSGALG00000003483	11.7646	28.538	14.8339	17.3964	15.1654	30.9534	16.9968	12.7284	12.3057	13.1776	10.2316	10.7309	12.5262	8.0372	11.0112
ENSGALG00000002926	0	0.0331815	0	0	0.0662894	0.0752577	0	0	0	0	0	0	0	0	0
ENSGALG00000025208	0	0	0	0	0	1.41867	0	0	0	0	0.894643	0.887925	0	0	0
ENSGALG00000010839	21.0861	51.9725	27.0625	35.4526	20.8191	54.0437	22.7092	24.9619	20.0779	24.4249	16.4062	23.7531	19.6304	18.2583	19.829
Novel00494	0.224093	0.21019	0.0454223	0.172526	0.157468	0.516451	0	0.0606128	0.0459298	0	0.100211	0.049729	0.118078	0.0402147	0.088667
Novel00339	7.54687	8.84831	9.62813	17.0035	38.2655	24.4757	12.7435	5.76361	7.18805	5.65692	4.06964	5.31977	5.49702	3.26632	3.24955
ENSGALG00000005537	64.8943	34.4707	54.6595	6.19507	9.97716	7.75003	34.7391	40.0646	57.2723	67.0958	79.5577	65.5989	50.4154	48.6803	48.724
ENSGALG00000009229	211.916	250.329	185.862	197.762	176.152	199.362	220.347	210.77	209.634	220.842	187.961	203.68	205.298	193.991	200.554
ENSGALG00000006964	0	0.108095	0.0934382	0.0295753	0.107976	0.163445	0.0336715	0.249373	0	0	0.0687143	0.238694	0.202416	0.0275752	0.0607989
Novel01036	7.08486	4.96953	6.968	3.72331	3.26125	3.93182	8.66698	7.4653	9.97531	9.0746	11.0199	10.0895	5.48607	7.36316	5.87467
ENSGALG00000025644	0	0	0	0	0	0	0	0	0	0	0	0	0	0	0
ENSGALG00000006382	0.826897	5.11893	1.444	1.51808	1.52563	4.61876	2.20782	0.86711	0.385892	0.890211	0.455106	1.03888	0.670316	0.7762	0.815429
ENSGALG00000009570	41.4494	46.904	52.5347	58.8722	49.2618	53.664	46.7795	46.5575	46.1469	50.551	48.8381	44.6516	51.4474	38.6296	49.8663
Novel01527	0.344778	0.0808469	0.0698844	0	0.161515	0.244488	0	0	0.14133	0	0	0	0.0908346	0	0
ENSGALG00000021615	2.05469	0.240902	1.04118	3.16376	6.25651	1.09276	0	0	1.26338	0.887538	0.229706	0.455962	0.811988	1.29054	0.609735
ENSGALG00000028470	1.65586	5.77095	3.27736	4.32441	5.5364	8.27695	5.12255	3.00342	2.60859	2.4403	2.42469	2.17592	2.80569	2.31896	2.19677
ENSGALG00000004246	1.89883	1.51717	1.71058	2.32819	3.62399	1.64571	2.40407	1.67394	1.00899	4.16182	1.32086	5.21256	2.77924	2.06978	3.28351
ENSGALG00000020201	0.52866	1.0025	0.587029	0.583968	0.581453	0.766062	0.574187	0.746046	0.631276	0.704932	0.565322	0.571279	0.678232	0.544477	0.363782
ENSGALG00000007906	6.00316	6.64609	6.82207	22.2753	8.71332	9.00237	15.0524	6.49495	3.83239	5.22872	9.98989	6.02755	1.29638	9.46611	2.76466
Novel01666	197.146	187.332	246.701	161.7	182.123	158.465	225.239	200.55	160.269	244.423	300.947	221.237	187.972	225.817	265.843
ENSGALG00000016518	0.419689	2.49312	0.810174	1.06165	0.9175	2.69264	1.34883	0.648672	0.475151	0.707884	0.625591	0.390276	0.758197	0.258224	0.569343
ENSGALG00000016036	1.22207	3.18484	1.12879	2.57246	2.34794	3.15921	2.64401	1.48118	1.83892	1.20277	1.6533	1.24955	1.65465	1.17149	1.22414
ENSGALG00000013634	33.7407	14.3418	28.5936	46.5515	46.3145	42.4403	24.1053	24.8	43.1172	20.9364	14.25	24.4353	18.4276	41.2121	30.4087
ENSGALG00000025857	0	0.0306763	0.0132583	0.0251794	0.0766057	0.0347878	0.0143334	0.159231	0.22791	0.0565092	0	0.0725772	0.327427	0	0.116465
ENSGALG00000003930	0.0551695	0.129367	0.201285	0.233608	0.180913	0.469459	0.217606	0.119378	0.203534	0.119154	0.0986834	0.0734568	0.232558	0.0792038	0.152803
ENSGALG00000013773	1.5863	13.6142	2.21858	3.14478	3.19541	11.305	4.58839	2.40276	1.39804	3.52885	2.34091	2.11212	2.63293	1.73649	1.66328
ENSGALG00000004158	1.03223	1.7266	1.08798	2.98012	3.2076	2.18371	1.29683	1.89854	1.21297	1.38222	1.41556	1.22168	1.05154	0.321081	1.71537
ENSGALG00000017068	14.5713	5.32999	15.9247	2.64903	3.46798	0.415898	3.01592	2.50999	0.224389	3.7157	3.47366	4.59292	0.453254	7.90551	6.6421
Novel00907	2.27072	1.10752	4.71306	1.88805	0.0850991	1.15935	2.468	4.5204	3.12751	1.33396	2.92442	1.77373	2.39296	0.847585	0.934393
ENSGALG00000005848	6.24622	3.81721	7.44501	3.34143	4.03018	3.17813	5.85872	6.81366	5.13142	9.17909	7.70578	9.28268	9.20189	6.89654	10.7826
ENSGALG00000013376	0	0	0.0853712	0	0	0	0	0.113922	0	0	0	0	0	0	0
ENSGALG00000025934	0.169318	0.0952877	0.219646	0.026071	0.0317274	0.0240132	0	0	0.0277625	0	0	0	0.178432	0.316004	0.321571
ENSGALG00000015768	0.417282	0.562628	0.232596	0.762992	0.4887	0.758248	0.525772	0.42325	0.855255	0.743522	0.489828	0.48615	0.687102	0.673952	1.11447
ENSGALG00000025166	0	1.06428	0	0	1.0631	3.21848	0	1.22764	0.93025	0	0	0	0	1.629	0
ENSGALG00000028575	0.192758	0.253118	1.12524	88.744	174.386	207.054	0.540656	1.54326	0.948176	0.766019	0.724062	0.0342202	0.487522	3.45914	0.549133
ENSGALG00000018534	0	0.0787053	0	0.129204	0.078618	0	0	0	0.0687933	0	0	0	0	0	0
ENSGALG00000004240	21.9643	19.8829	18.2222	22.0878	24.8859	29.2186	17.2373	22.9346	18.6352	26.9183	16.3701	28.1113	25.6587	22.6719	29.2382
ENSGALG00000015537	3.1966	10.2767	5.07077	2.46102	3.03836	9.52698	6.17224	3.30811	2.2029	2.90167	3.37685	5.44875	4.73569	4.8386	4.65593
Novel01122	0	82.2391	3.43627	0.509839	0.124091	24.5129	5.57234	0.286591	0.32575	0.686527	0.236909	0.587825	0.837451	0.855649	0.104809
ENSGALG00000007798	1.05027	1.43978	1.33189	2.77823	1.03448	1.96694	1.13302	1.19459	1.34677	0.744488	0.602133	1.12351	3.06502	1.64313	1.53438
ENSGALG00000017825	0	0	0	0	0	0.396394	0.48997	0.604791	0	0.482925	0	0.496194	0.589089	1.20378	0
Novel01696	53.7706	51.7977	35.348	41.2574	38.7201	41.7364	44.1055	56.2102	47.2105	37.3508	50.3651	32.6527	31.2999	34.8814	41.4008
ENSGALG00000000722	0.232062	0.043533	0.0376301	1.60795	0.130454	0.197471	0.162725	0.0502146	0.0380505	0	0	0	0.048911	0	0
Novel00428	1.25583	2.29837	1.3162	1.4149	2.32452	2.19374	2.09412	1.72324	1.3058	1.48185	1.31493	1.90321	2.03357	1.09934	1.45432
ENSGALG00000025662	0.598611	1.68442	4.85339	9.67811	0.56085	2.12242	1.04938	0.64765	0.981524	0.517148	2.67688	3.7195	1.26167	0.859392	0
ENSGALG00000008625	9.78327	11.0431	7.95476	9.32328	10.3743	12.3841	8.55062	8.79534	7.17033	9.17842	8.17318	9.45549	7.53305	9.25621	9.44999
ENSGALG00000027600	0	0	0	0.532086	0	0	0	0	0	0	0	0	0	0	0
ENSGALG00000004324	2.05469	3.18867	1.94859	3.22128	3.37181	4.96268	2.76149	2.12871	2.2358	1.7428	2.04925	2.40969	2.37527	2.19895	2.21722
Novel01570	1.37317	2.1076	2.22666	1.72994	2.22222	2.65564	0	0	0	1.50983	0.66988	0.554042	0.789322	1.79216	2.0745
ENSGALG00000010377	0	0	0	0	0.0461919	0	0	0.0533408	0	0	0	0.0437629	0	0.03539	0
ENSGALG00000028193	0.856223	1.73301	1.2788	2.15105	1.98442	1.91735	1.14549	1.41393	1.10836	1.28475	0.886688	1.44005	0.712355	1.97324	1.64042
ENSGALG00000005774	20.9259	21.8084	21.9932	24.6269	38.8156	31.4764	27.5437	21.7254	19.2352	21.2433	12.729	15.6354	19.8991	15.3245	15.3886
ENSGALG00000026209	0.036585	0.720619	0.118649	0.253496	0.308495	0.25943	0.513077	0	0	0.126425	0.196322	0.162373	0.0385545	0	0
ENSGALG00000013018	9.40164	9.7686	16.3952	5.45984	6.6444	8.47725	10.2298	18.5022	19.1698	12.2533	12.0691	15.7914	17.8083	8.52315	13.4688
ENSGALG00000011468	17.296	25.5879	49.4634	27.2976	25.7069	23.359	23.705	47.7178	35.9007	35.0463	42.3285	24.1457	29.6604	20.5983	34.1553
ENSGALG00000008154	1.61336	3.51293	1.84064	3.39803	4.03809	4.03688	2.36362	2.48114	1.6628	1.89158	1.88611	1.91287	3.21825	2.10113	2.55343
ENSGALG00000026005	1.19565	0.934561	1.13097	3.22181	4.10751	3.95667	2.18335	0.646801	0.653491	0.344313	0.267338	0.619104	1.15502	0.357611	1.18271
ENSGALG00000005246	0.078085	0.395499	0.0759713	0.168326	0	0.243634	0.260083	0.456202	0	0.0269835	0.0139673	0.0415873	0.21395	0.0112102	0.0123584
ENSGALG00000009621	248.96	1120.68	392.289	722.779	585.211	1141.76	638.716	346.53	260.441	306.055	279.154	270.33	330.83	215.306	316.191
ENSGALG00000007711	705.529	858.948	662.984	825.149	951.795	949.626	683.995	716.965	637.846	711.791	613.881	726.28	555.254	702.129	704.111
ENSGALG00000010333	17.579	14.7325	15.6594	11.7059	11.8499	16.0272	13.7674	14.7707	15.3852	11.1633	12.496	12.159	7.5545	14.6835	8.92472
Novel00288	0	0	0.110661	0	0	0	0	0	0	0.117913	0	0	0	0	0
ENSGALG00000011705	3.07827	3.64181	3.8089	2.87363	2.73335	3.72682	2.73576	2.9359	2.98092	3.73422	3.7987	3.72257	4.28386	3.45691	3.79398
ENSGALG00000003067	109.519	81.8825	99.1661	60.7123	72.0928	69.2455	87.037	100.228	99.9498	128.507	108.388	108.978	80.1856	106.966	76.7008
ENSGALG00000003150	18.0078	24.9375	19.3867	19.6515	21.8857	27.1656	22.8944	18.0586	18.5239	18.4558	18.5366	19.6792	23.3187	18.9933	22.2493
ENSGALG00000017283	3.20277	9.72368	6.28681	7.65685	8.5284	10.5787	8.56958	5.83603	4.1459	6.55322	5.57813	6.80808	7.81621	10.0431	9.13746
ENSGALG00000027806	0	0	0	0	0	0	0	0	0	0	0	0	0	0	0
ENSGALG00000013223	0	0.148711	0	0.0610318	0.371366	1.1805	0.277939	0	0.0649914	0	0	0	0	0.0569045	0
ENSGALG00000010032	0	0.0691342	0.0256114	0.437755	0.453807	0.186667	0.0553761	0.0341766	0.00863251	0	0	0	0.0221928	0	0.0249975
ENSGALG00000025896	0.19587	0.110231	0.0423484	0	0.0978742	0.0277789	0.0572277	0	0	0	0.0116786	0	0.330262	0.178093	0.0516665
ENSGALG00000026214	0.0436917	0	0	6.40236	0.34113	1.22897	0	0.031514	0	0.012582	0	0	0	0.0104543	0.06915
ENSGALG00000016844	5.86049	18.1703	4.83953	8.6896	8.99882	10.9281	11.9383	6.69285	4.76014	3.32842	3.25162	3.37171	6.34753	4.05098	3.90764
ENSGALG00000012245	17.319	40.242	22.6128	31.4293	26.3944	30.2643	32.7265	30.3576	27.2449	29.2927	32.0854	25.3558	33.6583	20.9083	27.3659
ENSGALG00000028749	296.059	1054.96	394.031	675.557	755.305	1061.63	592.461	478.555	313.306	350.473	405.202	324.292	416.42	246.109	412.03
ENSGALG00000007479	47.6855	45.9258	52.3834	52.7953	78.0824	61.4725	53.9268	51.8304	69.2278	60.4997	56.7592	56.0983	51.2743	56.7226	41.9903
ENSGALG00000001287	11.2195	11.7292	11.418	30.9518	23.1587	20.8428	8.80966	8.78783	8.14416	6.6637	4.59906	6.17248	4.74169	5.411	4.90163
ENSGALG00000010764	4.98978	5.43081	5.41957	12.2858	10.2321	7.07667	5.40514	4.37996	4.39953	3.09072	3.32597	3.96955	4.86154	3.07492	4.17212
ENSGALG00000021142	2.41345	479.455	57.1375	3.34454	25.0994	335.437	40.6162	2.08893	1.5829	6.25503	1.07925	2.35653	3.30638	4.33106	3.05577
ENSGALG00000009971	1.24402	9.81011	2.01724	2.0574	4.44635	10.0958	2.78659	1.84443	0.528833	0.398047	1.31865	1.63593	1.06822	0.496104	1.31259
ENSGALG00000025604	0	0	0	0	0	0	0	0	0	0	0	0	0	0	0
ENSGALG00000009457	0	0.176067	0.152193	0.144517	0.175871	0.53244	0.658132	0.609271	0	0.324335	0	0	0.197818	0	0
ENSGALG00000016234	0.794835	5.1748	1.36468	1.63782	1.09514	3.16628	3.36048	1.26463	0.804958	1.27236	0.794504	1.22431	0.443447	0.587331	1.09147
ENSGALG00000001387	2.34994	3.336	3.19261	3.52057	3.62983	5.58462	2.95046	2.3363	3.5407	2.41422	1.9881	2.70606	2.54337	2.55305	2.31193
ENSGALG00000027654	0	0	0	0.248533	0	0.114458	0	0.349264	0.132329	0.139443	0.433075	0.429824	0.340196	0	0
ENSGALG00000028815	0.0453331	0	0.0183775	0.052352	0.169894	0.128586	0	0.0245234	0	0.0979096	0.162177	0.02012	0	0.0162705	0.0358739
ENSGALG00000006179	696.074	1238.42	867.741	1101.93	1297.56	1186.7	903.507	920.401	775.857	1072.27	705.197	898.903	789.684	831.575	1071.45
ENSGALG00000012668	0.0138729	0	0	0.0106806	0.0259956	0.03935	0	0	0	0.011985	0	0	0	0	0
ENSGALG00000013049	7.96405	7.86138	7.52853	13.9764	15.6076	9.14934	18.7471	12.3791	10.1502	10.6358	16.2362	11.7307	18.1782	12.1575	14.6961
ENSGALG00000025533	0	0	0	0	0	0	0	0	0	0	0	0	0	0	0
ENSGALG00000002336	4.90894	6.35771	4.9487	6.86411	5.36075	7.64785	5.77027	4.22073	4.89072	3.01216	4.68114	4.01835	4.2225	3.6521	3.02925
ENSGALG00000025600	0	0	0	0	0	0	0	0	0.890382	0	0	0	0	0	0
ENSGALG00000011265	0	0	0	0	0	0	0	0	0	0	0	0	0	0	0
ENSGALG00000013085	0	0.0862863	0.059669	0	0.0689525	0.0391405	0.0645071	0	0.0150839	0.0158949	0.0164552	0.0326633	0	0	0
ENSGALG00000000336	111.969	67.7437	103.733	100.075	84.8824	77.6506	79.9163	99.6537	104.163	109.668	115.997	112.503	81.4506	127.721	159.596
ENSGALG00000027751	3.88427	5.84053	2.0941	4.39318	5.17749	6.46006	3.72052	7.66844	1.19828	6.55567	5.47954	7.39337	5.92906	4.65661	3.46989
Novel01052	1.47521	2.65731	1.53585	4.19451	4.05222	3.87531	2.18936	1.99508	1.5805	0.984805	1.30438	1.24995	1.87262	1.45604	1.56537
ENSGALG00000028139	0	0	0.61638	0	0	1.07819	0	0	0	0	0	0	0	0.545714	0
ENSGALG00000016672	0	0.300451	0.0865703	0.0411022	0.250098	0.378578	0.140385	0.173283	0	0.046122	0.0477478	0.189557	0.0562613	0.0383226	0.16899
ENSGALG00000000790	44.9303	46.1015	46.0878	44.874	46.1505	57.2434	46.219	46.9926	50.6761	52.4776	42.7643	48.0391	50.9523	58.1379	57.9621
ENSGALG00000019567	0	0.103644	0.0895902	0.0850719	0.207058	0	0	0	0	0.0954619	0	0	0	0	0
ENSGALG00000010988	0.91363	1.8943	1.20859	3.66504	2.79325	3.47804	1.89666	2.13303	1.10383	1.20472	0.6881	1.45123	1.36821	1.03551	1.25572
ENSGALG00000017010	25.9391	21.2239	26.2885	18.1289	16.8913	15.3934	20.5592	26.6708	24.9232	26.3426	25.6259	28.4136	28.3533	23.8028	32.9736
Novel01815	14.5096	11.2461	14.5818	13.7126	9.44279	10.9667	19.0388	21.6204	16.5967	9.8329	11.0343	15.5788	8.42364	15.28	16.2262
ENSGALG00000020999	4.08596	4.99381	7.12753	16.0146	12.2967	7.02405	4.77521	5.35841	4.16188	4.81352	2.76844	4.06652	7.43749	2.66636	7.83851
ENSGALG00000014670	3.65619	4.70286	4.03372	2.78499	2.34428	4.47699	7.6165	5.19384	6.07445	3.93782	3.81641	4.10627	5.03856	3.44596	4.26703
ENSGALG00000006884	26.476	18.5118	32.3949	15.7082	17.8016	14.3378	19.6178	22.4481	32.0403	33.1072	24.461	30.7499	24.4591	29.3579	29.1428
ENSGALG00000005887	0.137928	1.01145	0.528646	0.492331	0.422927	0.666867	1.87939	0.624043	0.267276	1.10492	1.23358	0.511989	1.5196	0.108009	0.813651
ENSGALG00000015138	2.92823	2.99938	3.15889	7.06504	2.52541	5.29104	2.85659	2.31975	2.35044	1.89465	1.15056	2.3056	1.61394	1.8469	2.23966
Novel00336	7.89351	9.22439	9.967	7.32241	8.48673	12.4795	5.501	9.80019	5.62267	7.26648	6.19169	8.27017	7.15932	4.04061	8.19207
ENSGALG00000028703	0	0	0	0	0	0	0	0	0	0	0	0	0	0	0.090535
ENSGALG00000007585	27.7477	20.7267	18.3234	21.4109	25.5856	18.1182	19.5891	22.5496	24.0352	20.7175	23.5813	20.8967	22.6919	20.1883	23.1998
ENSGALG00000027878	27.1425	45.0421	36.943	43.2116	44.762	46.5068	35.7401	35.0798	29.9048	42.8656	33.5021	34.8859	38.4402	38.1735	35.2799
ENSGALG00000014436	0.921691	2.05693	1.52034	0.929816	2.47154	2.18613	0.975023	1.61615	1.2507	1.75727	1.08015	1.63628	3.0144	1.55136	1.38329
Novel01301	0	1.55322	0.732333	0.3477	0.282091	0.533758	0.131952	0.651498	0	0	0.134639	0.133628	0.475938	0.108062	0.11913
ENSGALG00000012791	0.0853239	3.68139	0.415071	0.656897	0.0799416	2.45043	0.523514	0.0923138	0.139903	0.184281	0.0763107	0.113607	0.179834	0.214366	0
Novel00239	0.712165	0.626232	0.757845	0.514018	0.250215	0.536571	0.468168	0.626037	0.547366	0.230718	0.51751	0.987739	0.234532	0.351455	0.317005
ENSGALG00000006045	0.219468	0.288192	0.249114	0.439309	0.205623	0.49801	0.23084	0.237447	0.107956	0.303362	0.392568	0.116886	0.277539	0.157539	0.312612
ENSGALG00000004257	5.9462	7.14942	6.95652	5.4689	9.60923	9.64995	7.73046	11.2259	7.95034	8.86047	9.49401	10.8751	5.25697	5.12771	8.40037
ENSGALG00000006790	0.457737	3.97445	0.551381	0.936391	0.477875	4.28457	1.26096	0.367889	0.128663	0.598817	0.818768	1.14928	0.385903	0.21592	0.620959
ENSGALG00000025422	0	0	0	0	0	1.15935	0	0	0	0	0	0	0	0	0
ENSGALG00000024141	0	0	0	0	0	0	0	0	0	0	0	0	0	0	0
ENSGALG00000016129	1.78632	9.21521	2.21505	5.54149	4.52866	9.72384	5.06562	3.41057	1.5937	3.94884	3.99405	2.61162	2.10395	3.54507	2.61929
Novel00122	0	6.66421	0.192019	0.911674	0.221894	3.02297	1.66071	0.768706	0	1.22762	0	1.26135	1.4975	0.510013	1.1245
ENSGALG00000027304	0	0	0	0	0	0	0	0	0	0	0	0	0	0	0
ENSGALG00000024155	0	0	0	0	0	0	0	0	0	0	0	0	0	0	0
ENSGALG00000023531	0	0.961983	0.519714	0.394803	1.44138	0.18182	0.674225	0.138704	0.210208	0.44302	0	0	0	0.092026	0.304353
Novel01210	0	0	0	0	0	0	0	0	0	0	0	0	0	0	0
ENSGALG00000025328	0	0	0	0	0	0	0	0	0	0	0	0	0	0	0
ENSGALG00000004545	0	0	0	0	0	0	0	0	0	0	0	0	0	0	0
ENSGALG00000017026	8.33897	8.90794	7.73762	7.6684	6.96654	9.39557	8.91321	10.2752	12.0969	6.98402	8.12102	7.68994	11.3266	9.81022	10.3017
ENSGALG00000011022	0	0	0	0	0	0	0	0	0	0	0	0	0	0	0
ENSGALG00000014755	0	0.110553	0	0	0	0.0835807	0	0	0	0	0	0	0	0	0
ENSGALG00000013480	18.6603	16.7679	20.2845	31.6414	28.7934	18.95	24.4332	16.2509	19.6801	36.6203	33.4607	26.543	18.1597	14.817	28.5489
ENSGALG00000004617	4.85903	6.93131	2.21601	4.59819	11.8555	20.3148	35.2256	30.1187	7.38626	17.928	14.9385	57.6879	28.6967	4.57789	21.1483
Novel01617	1.40228	20.4808	5.9283	2.85322	4.03531	16.2652	6.2334	4.22637	1.56022	3.89394	2.86663	2.93401	3.06109	2.44457	3.17052
ENSGALG00000007101	21.7509	24.7171	23.1461	22.4215	24.1019	29.3277	24.6104	17.4233	23.1475	17.8423	23.2878	17.9612	23.1973	23.3824	21.8878
ENSGALG00000014573	2.84361	5.98098	7.24845	9.30435	3.31011	10.8613	4.41847	5.50053	8.26549	6.01131	2.71663	3.32727	3.1102	4.87107	4.31301
ENSGALG00000004491	0.087484	0.164113	0.307363	0.561273	0.245896	0.496291	0.460087	0.283952	0.167352	0.201543	0.391213	0.232965	0.307312	0.272124	0.299995
ENSGALG00000023475	0.784904	2.52414	1.5455	3.71205	3.25674	4.45271	1.57253	1.69841	0.827346	1.06557	1.70484	1.99063	0.354496	1.04635	1.06479
ENSGALG00000026511	0	0	0	0	0	0	0	0	0	0	0	0	0	0	0
ENSGALG00000012813	8.0013	13.349	11.9933	18.9289	15.7911	20.1207	12.0227	10.7179	11.9803	8.75187	9.50136	10.4049	9.82557	11.7283	10.1627
ENSGALG00000001362	26.0535	27.0387	24.7732	20.6884	19.2128	22.2796	24.032	27.5484	21.8442	22.233	23.9114	23.0861	31.8165	27.6121	36.7008
ENSGALG00000000312	16.132	19.599	18.1258	25.9153	26.1526	21.2576	14.0564	19.4806	19.2395	13.8269	17.2964	17.7867	15.2937	15.3867	14.6758
Novel01310	233.769	219.547	302.963	197.061	238.55	253.811	227.377	195.814	257.666	247.296	281.627	303.737	219.49	234.431	189.381
ENSGALG00000028330	4.26352	5.19352	5.20758	4.39078	3.73519	5.61476	6.3093	6.76943	5.26577	5.30971	6.88347	4.81665	4.7848	7.63125	5.08275
ENSGALG00000004071	0.507953	2.66012	1.5787	0.26071	0.0396592	0.720395	1.96643	1.00754	1.56164	0.621672	1.09788	1.12721	3.92551	0.18231	3.48368
ENSGALG00000026103	0	0.578947	0.0834074	0.316804	0.192768	2.04258	0.450852	0	0	0.177748	0.0920066	0	0	0.0738449	0.081408
ENSGALG00000010365	1.37043	1.37406	0.565135	3.0197	5.2577	2.71433	0.590248	1.81503	0.610192	2.56179	1.66944	1.77226	2.88841	3.08687	4.05745
ENSGALG00000019501	1.35605	0.238485	0.412295	14.2898	22.9486	10.4574	2.9715	1.37544	1.87606	3.58775	4.39642	1.57985	4.5551	1.58178	2.88395
ENSGALG00000016296	0	0	0	0	0	0.0387421	0	0	0	0.0235996	0	0	0	0.0196088	0
Novel01435	0.835424	2.20831	0.431035	3.33285	0.284627	0.592413	1.59766	0.0821694	0.311322	0.131224	0.339625	0.0674149	0.160072	0.163551	0
ENSGALG00000028368	2.39954	30.9021	6.70113	7.56544	4.96026	12.6941	7.57833	3.0082	1.62374	2.99433	2.112	2.94136	1.28443	1.72244	2.68251
Novel00683	5.49709	9.98298	12.4224	6.93349	4.93117	4.72745	8.20134	9.49057	5.36969	8.08342	6.48547	7.47496	3.82092	7.72395	5.36817
ENSGALG00000027856	0	0	0	0	0	0.0471237	0.0582481	0	0	0	0.0594343	0	0	0.0477023	0.0525879
ENSGALG00000003447	13.1959	15.2837	12.8214	9.48071	12.5888	15.078	10.4426	12.8897	12.7895	14.1233	12.7337	12.7567	11.3446	15.9534	12.81
ENSGALG00000008353	0.444856	0.98824	0.550509	1.41502	1.05295	1.46105	0.656713	0.683952	0.422294	0.455112	0.439744	0.322136	0.456467	0.462185	0.463201
ENSGALG00000003059	9.08246	15.0817	11.1821	23.7226	29.2476	23.2813	16.5705	13.7571	8.54924	13.0774	12.6358	11.8841	19.8518	12.0733	18.7935
ENSGALG00000012754	0.0561267	0.0131611	0	0	0	0	0	0.0303623	0	0.0121221	0	0.0373656	0.014787	0.0503612	0.0111038
ENSGALG00000012650	4.91797	12.5316	4.63531	8.39291	10.6362	11.5666	7.18446	4.7666	5.39269	5.52331	4.27017	4.16535	4.68604	3.94209	3.48639
ENSGALG00000026856	0	0	0	0	1.34392	0	1.25728	0	0	0	0	0	0	0	0
Novel00013	1.36274	1.86935	1.53301	3.09499	2.58546	1.71525	1.44828	1.65867	0.949634	1.48632	1.38637	1.7086	0.969364	2.34768	1.41538
ENSGALG00000013869	1.06203	15.6892	2.33206	4.32669	0.663357	9.3824	4.84836	0.574516	0.108836	0.535209	0.197884	0.589194	0.0932668	0.254116	0.175089
ENSGALG00000006138	0.890519	1.96288	1.09024	1.89911	1.55188	2.69643	1.31914	1.18507	0.46725	1.13861	0.637159	1.09875	0.77892	0.658411	0.697656
ENSGALG00000020778	0	0.20609	0.0890723	0.592061	0.205861	0.155808	0.0962946	0.118861	0.180135	0	0.196511	0.0975178	0.115775	0	0.0869372
ENSGALG00000015294	0	0	0.0261068	0	0	0	0	0	0	0	0	0.0285821	0	0	0
ENSGALG00000014899	43.7918	69.3298	56.2902	49.2632	46.7633	49.1358	50.9604	53.5592	53.407	42.297	32.8409	44.787	30.0256	37.1457	38.6362
ENSGALG00000005020	1.98604	2.68593	2.73364	5.04933	4.67352	5.60057	2.9553	3.34803	1.55249	2.35419	1.48709	2.13188	2.33632	1.45877	1.93713
ENSGALG00000009454	4.572	4.60731	4.9629	4.82897	4.14198	4.79613	4.04055	2.90252	2.88091	5.45139	3.92006	5.80241	5.09685	5.23473	6.8772
ENSGALG00000015420	3.72079	4.33012	3.1657	5.64076	4.88482	6.22159	3.82502	3.18073	3.61533	5.00024	3.08125	4.07748	5.20392	3.94035	4.94371
ENSGALG00000027644	0	0	0	0	0	0	0	0	0	0	0	0	0	0	0
ENSGALG00000026354	0	0	0	0	0	0	0	0	0	0	0	0	0	0	0
Novel01691	9.35123	10.9444	17.8026	6.96578	7.10729	26.9157	9.01857	22.3536	17.21	8.41228	7.87	15.328	8.51743	15.4051	14.8218
ENSGALG00000005416	1.1676	3.69109	1.85826	1.73125	2.55254	2.63721	3.60091	1.26325	2.58808	1.79325	0.773525	1.38189	2.00518	2.20396	1.98482
ENSGALG00000000751	46.5819	54.6661	42.7322	43.3341	48.6122	50.1877	40.5183	51.4331	52.4432	54.3418	57.1375	45.9103	45.0563	70.5052	44.9311
ENSGALG00000028797	36.3913	122.203	45.2713	21.7436	65.1549	66.3856	89.6054	47.9884	24.5967	46.7184	59.4627	30.0013	63.1366	67.7988	34.2204
ENSGALG00000008937	2.01436	3.60384	2.19272	3.48937	2.77852	4.12654	2.25607	2.44172	1.81965	1.70801	1.7849	1.98672	1.92625	2.32959	2.46487
ENSGALG00000003082	12.9203	17.0949	14.2709	18.3085	23.2163	19.6075	11.5437	11.4126	9.62022	11.0002	13.5651	12.6322	11.9056	11.0218	9.08829
ENSGALG00000009900	2.83134	5.60864	3.94017	11.4033	15.4809	14.4438	5.42643	6.05799	3.10075	2.39127	5.63143	4.05119	3.7631	2.38124	4.41422
ENSGALG00000014904	0	0	0	0	0	0	0	0	0	0	0	0	0	0	0
ENSGALG00000001545	14.8628	10.3331	12.7049	10.2728	10.5441	10.3038	12.2367	7.65489	13.7033	3.93821	9.13083	4.59436	7.7564	7.77157	8.41721
ENSGALG00000024136	0	0	0	0	0	0	0	0	0	0	0	0	0	0	0
ENSGALG00000008752	1.59809	1.39188	1.24942	1.62582	0.802117	1.09276	1.40075	0.926256	0.982629	0.788922	0.867777	1.57053	1.62398	2.17138	1.76146
ENSGALG00000001630	6.90283	6.76361	5.24685	5.24322	6.03431	8.47868	5.83435	3.80084	8.03401	3.5408	3.50024	2.0789	2.82534	4.13654	2.90195
ENSGALG00000001705	0.523699	0.682233	0.660492	0.223993	0.517922	0.722095	1.12207	1.25911	0.691724	0.60324	0.442357	0.361559	0.643873	0.208846	0.437447
ENSGALG00000005505	0.929127	4.38553	1.32437	2.82668	2.10609	4.08068	3.02114	1.52408	0.933734	1.32055	0.884591	1.1573	1.02652	0.935879	1.49423
ENSGALG00000026752	30.9484	39.547	28.7926	28.6457	27.8966	37.5425	29.8699	37.9984	31.6445	31.1678	29.8562	33.2974	34.0345	37.785	33.1932
ENSGALG00000006627	0.783273	0.345731	0.448277	0.496614	0.733864	0.980174	0.323083	0.398795	0.151095	0.437852	0.288455	0.858866	0.339887	0.330736	0.656297
ENSGALG00000013695	5.12976	9.77575	6.77776	7.1673	6.71338	11.9521	5.9713	5.31508	5.5184	4.83028	4.92772	4.40888	5.40591	5.00709	4.31712
ENSGALG00000001239	1.2831	1.63809	1.32928	2.08544	1.73645	3.51309	1.59326	1.58102	1.28569	1.35482	1.33882	1.3604	2.5541	1.50948	1.74869
ENSGALG00000004568	0.155786	0.365302	0.0631537	0.0599688	0.0729795	0.497117	0.0682745	0	0	0	0	0	0	0	0
ENSGALG00000012552	143.697	107.189	215.03	54.1461	71.5582	28.0699	157.013	172.511	145.236	199.54	264.454	345.402	165.804	110.797	250.211
ENSGALG00000005000	8.79229	13.8274	6.91418	9.72099	11.9539	8.39114	9.67669	9.94171	5.47391	8.39533	5.32118	10.8559	9.75327	6.97565	9.20718
ENSGALG00000027955	1.41125	4.23967	0.66331	1.90532	1.11144	1.18929	2.16921	3.82823	0.586881	0.777461	0.823158	1.8155	1.18547	1.46816	13.984
ENSGALG00000000509	0	0.0106731	0	0.0175212	0	0.0161382	0	0	0	0.0294916	0	0.0101006	0.0239833	0	0.00900472
ENSGALG00000027207	0.389865	2.84706	1.17406	1.86523	3.62662	2.6856	4.34476	0.361545	0.296794	1.34724	1.66869	0.642689	1.99557	0.379801	0.705178
ENSGALG00000027597	0	0	0	0	0	0	0.67309	0	0.629563	0	0	0	0	0	0
ENSGALG00000025722	0	0	0	0	0	0	0	0	0	0	0	0	0	0	0
Novel00132	8.1692	25.6455	9.05647	15.7876	17.026	19.625	10.8137	19.3003	12.5747	47.2419	30.4179	10.6551	11.5958	12.5658	8.57551
ENSGALG00000015119	8.35358	18.3482	12.5469	16.0089	16.1037	21.6064	12.616	9.72064	11.1351	9.52717	9.29863	10.1357	11.3999	8.82202	10.4389
ENSGALG00000010961	0.871128	2.16416	1.73709	0.888184	0.529412	1.93667	1.17629	0.815129	0.694879	0.752579	0.863334	1.27483	0.595475	0.709817	0.689359
ENSGALG00000027458	1.07075	13.391	1.4469	9.43433	8.80596	15.6076	5.42264	3.47542	2.0483	1.64451	2.23451	3.90743	4.01208	0.768611	1.12978
ENSGALG00000002517	36.4162	41.3757	46.8753	52.3153	62.6102	48.5852	37.8426	58.8962	26.3157	35.839	34.2482	44.8216	36.0028	32.3386	53.6246
ENSGALG00000005202	45.2062	32.5238	30.864	26.5081	29.8912	30.2327	33.0945	34.0856	36.171	33.1741	45.9036	32.6686	36.9623	38.0679	29.3873
Novel00852	2.24801	5.65472	1.90548	5.19213	5.74419	5.65181	3.94083	2.98494	1.92677	4.50211	2.46748	3.99089	5.38415	2.64055	2.42583
ENSGALG00000010755	0.418863	0.294657	0.169802	0.241857	0.490551	0.6683	0.18357	0.906353	0	0.542792	0.280962	0.278853	0.220706	0.300669	0.414329
ENSGALG00000007573	0.0635649	0.149053	0.0773052	0.195751	0.11911	0.1803	0.445725	0	0	0.0274573	0.0568502	0	0.20096	0	0.0251507
ENSGALG00000011762	2.77637	5.20824	3.90617	3.47342	2.73512	4.48764	4.205	3.82103	3.79919	3.65073	2.86651	3.5517	5.12021	3.3118	3.94177
ENSGALG00000021723	0	0	0	0	0	0	0	0	0	0	0	0	0	0	0
ENSGALG00000025581	0	0	0	0.51796	0	0	0	0	0	0	0	0	0	0	0
ENSGALG00000007365	2.37069	5.35687	3.05788	4.7703	3.68507	7.37388	5.10041	4.1971	2.82701	2.69972	3.27676	3.68259	6.01865	3.44214	4.13577
ENSGALG00000028302	0.518932	0.121684	0	0	0.121549	0.0919958	0.341139	0	0.10636	0.112078	0.116029	0.230315	0.136717	0	0
ENSGALG00000000518	8.77026	9.71429	9.79062	8.2111	7.59765	8.71929	8.88478	12.7311	15.4643	9.51852	11.8248	10.0148	12.4935	14.6473	13.4271
ENSGALG00000020661	0	0.154344	0	0	0	0.116687	0.721167	0	0	0.284319	0	0	0.346823	0	0
ENSGALG00000027842	0.575936	8.82334	1.55652	0.591207	1.25908	4.08406	0.504817	1.24624	0.314782	0.497559	1.37359	0	0.202314	0.137807	1.82305
ENSGALG00000006078	1.06759	1.42298	1.29836	1.51407	1.44772	2.39067	1.23126	0.851088	0.690984	1.28637	0.552787	0.723203	0.858599	0.94784	0.889291
ENSGALG00000008490	0.024691	0	0	0.0570278	0.115667	0.0350176	0.0432841	0.106855	0	0	0.0441655	0.021917	0.0520404	0.0177237	0
Novel00169	4.64668	4.04388	4.31117	3.09797	2.69293	4.28015	3.61102	5.23466	5.69463	5.25588	4.7128	4.93254	6.71421	5.91448	5.83788
ENSGALG00000023918	0	0	0	0	0	0.297022	0	0	0	0	0	0	0	0	0
ENSGALG00000012396	4.41484	13.9136	4.22374	12.712	12.9054	15.9662	7.275	4.77651	3.61944	5.33966	4.58024	7.28903	4.74556	2.28173	2.02631
ENSGALG00000027794	0	0.666421	0.576056	1.09401	0	0	0	0	0	0	0	0	0	0	0
ENSGALG00000021211	0.140784	4.62175	0.799012	0.794845	0.351743	2.12976	1.43966	0.507726	0.23084	0.729753	0.419709	0.833115	0.197818	0.808465	0.371361
ENSGALG00000011421	0.240472	0.128887	0.0557054	0.0528961	0.0321862	0.121802	0.240889	0.0371674	0	0.0890345	0.0307243	0.0304936	0.14481	0.123297	0.135925
ENSGALG00000027422	1.05588	1.98075	4.28042	3.25164	2.96783	5.98995	2.77649	0	0.865649	0	3.77738	0	2.22545	0	0
ENSGALG00000007272	10.268	24.0296	11.8858	15.5442	16.2116	21.7426	12.4396	15.5308	11.9686	12.9458	12.7475	12.6518	13.1134	13.6319	13.5639
ENSGALG00000027234	0	0	0.0231722	0.0880143	0.10711	0.0202668	0	0	0	0	0	0.0253693	0	0	0
ENSGALG00000026744	0.0602644	0.536993	0.219874	0.0231984	0.112926	0.149571	0.18488	0.195604	0.0494069	0.104126	0.296441	0.641925	0.412806	0.237925	0.548431
ENSGALG00000003415	10.7415	9.11965	10.1729	8.69744	8.06845	9.88233	7.91352	9.46745	9.10988	5.15983	12.5882	6.74001	7.51394	7.1787	7.32771
ENSGALG00000005316	0.645663	1.38933	2.36082	1.25734	1.90969	1.28377	1.88644	1.13687	1.50498	1.66245	1.4946	1.20243	0.787153	1.41768	0.991822
ENSGALG00000015185	87.9191	82.2967	111.964	50.6797	46.6753	55.2414	86.705	111.378	120.181	104.93	90.3105	103.367	78.2311	115.691	122.94
ENSGALG00000020883	0.357254	0.402107	0.637235	1.43023	0.535549	0.81067	0.501022	0.927649	0.761511	0.679	0.383418	0.570809	1.28005	0.205156	0.848128
ENSGALG00000000483	0	0	0	0	0	0	0	0	0	0	0	0	0.102319	0	0
ENSGALG00000002529	8.11016	5.82518	6.33856	9.14084	13.6226	9.7146	8.13336	9.486	10.3329	5.74404	6.99206	6.42071	9.97121	8.81115	10.5519
ENSGALG00000010115	0.460022	1.53833	0.486488	1.30887	0.824528	1.53176	0.77137	0.627544	0.393539	0.708442	0.608197	0.514861	0.421553	0.315857	0.332379
ENSGALG00000026891	1.34447	10.7304	2.39814	5.26954	2.97737	7.24572	4.11385	2.27448	1.0822	2.00623	1.115	2.16985	2.26695	1.7898	2.0118
ENSGALG00000009473	0.445103	0.584484	1.01046	0.411214	1.00086	1.26252	0.312112	0.0963133	0.218946	0.153812	0.557318	0.553134	0.375251	0.255604	0.493119
Novel00615	0.217833	0.817272	0.294355	0	0.340153	1.64767	0.190934	0.314237	0.238116	0.0627295	0.0649406	0	0.0765197	0	0
ENSGALG00000014997	5.85454	6.61363	7.10275	7.00775	9.80936	10.091	7.5663	7.76743	6.061	8.97116	7.52928	9.29352	3.96302	2.63808	3.75369
Novel01025	0.101772	0	0.412571	0	0.190704	0	0	0.110109	0	0	0	1.62608	1.17976	0.584433	2.57716
ENSGALG00000003398	13.9239	15.321	14.5708	22.88	18.2031	29.6975	14.8378	12.4954	14.2175	11.8736	11.9221	12.615	12.171	16.2707	15.4174
ENSGALG00000002386	0.481314	0.293444	0.370726	0.277918	0.586238	0.494896	0.337504	0.624893	0.414328	0.395023	0.495041	0.277705	0.684753	0.293673	0.990297
ENSGALG00000025539	0	0	0	0.573819	0.698313	0	0	0	0	0	1.33319	0	0	0	0
ENSGALG00000002157	1604.05	2048.86	1800.38	1681.12	2172.94	2035.09	1529.66	1875.17	1427.33	1888.91	1459.98	1661.17	1337.56	1390.82	1956.04
ENSGALG00000009468	0.88213	0.150437	0	0.37044	2.55459	0.1706	0.070291	1.82203	0.131491	1.93985	0.860669	2.2067	0.0845107	2.18746	0.0634605
ENSGALG00000003379	0.196443	0.046064	0.278725	1.02086	0.184052	0.348253	0.860929	0.212536	0.0402628	0.50913	0.0878461	0.217966	0.931583	0.176264	0.544087
ENSGALG00000004250	0.268838	1.20676	0.731747	0.561789	1.00752	1.81106	0.656428	0.270086	0.283375	0.33179	0.326311	0.204544	0.28331	0.248115	0.303918
ENSGALG00000001467	5.49	9.33327	6.32898	9.3284	10.4079	11.7552	7.70683	6.24137	7.34911	4.52056	4.8717	5.90113	6.62173	5.88047	5.37966
ENSGALG00000025958	0.356918	0.334775	0	0	0.334404	0.253097	0	0	0.292614	0.308346	0.638431	0.633637	0	0.256204	0.282444
ENSGALG00000014812	0	0	0.0499903	0.189877	0.202188	0.153028	0	0.0667085	0	0.0532667	0	0.0820953	0	0	0
ENSGALG00000026568	22.3346	12.6231	31.9218	2.2045	8.1825	12.4875	3.13728	28.5015	4.9298	35.2508	15.7498	19.5711	18.8597	30.1119	3.85209
ENSGALG00000018340	0	0	0	0	0	0	0	0	0	0	0	0	0	0	0
ENSGALG00000001355	108.861	85.9041	121.446	113.465	126.854	84.8096	104.558	106.666	116.169	118.516	118.17	128.127	129.481	99.8707	150.063
ENSGALG00000016273	0	0	0	0	0	0	0	0	0	0	0	0	0	0	0
ENSGALG00000026810	0	0	0	0.0250019	0.0304263	0.0230284	0.0569294	0	0	0	0	0	0	0.0233112	0
ENSGALG00000004326	11.1848	16.1066	12.0022	15.7024	11.1573	17.2389	13.2061	10.713	11.3003	9.32164	9.15005	9.98657	12.6189	11.0276	9.86622
ENSGALG00000004902	9.2359	9.64941	7.03521	9.05904	11.6712	11.7235	8.44112	8.35673	8.3264	5.87778	7.40778	6.41855	8.31296	9.01266	7.38677
ENSGALG00000015287	0.0349695	0.0983997	0	0	0	0.0495948	0.0306513	0.0378342	0.0286692	0.0302106	0.0312755	0	0.110556	0	0.0830182
ENSGALG00000016053	9.52369	10.6447	12.7796	16.2994	16.9442	17.9306	11.8089	9.33453	12.1334	11.7538	11.99	11.8411	14.9322	12.9104	12.6308
ENSGALG00000011626	2.60314	3.49599	3.64552	4.91921	3.15953	4.65678	4.87453	2.75239	3.20122	3.22	2.9102	2.99338	4.23961	2.29327	4.07313
ENSGALG00000013810	11.792	11.5994	11.7483	9.38626	10.1821	10.9839	11.2994	11.2444	12.0639	10.6621	11.6636	13.5497	14.5594	13.5218	13.3844
ENSGALG00000010279	14.7824	12.6627	15.7153	10.0452	10.8114	12.7286	14.7419	20.3181	16.0145	12.7707	13.9628	14.7283	16.055	13.5887	16.95
ENSGALG00000026150	0.523098	3.97967	0.376991	1.65565	1.19802	0.123646	3.10764	0.18865	0	0.903823	1.55947	0.825472	1.10252	0.125164	0.827897
ENSGALG00000028557	0	0	0	0	0	0	0	0	0	0	0	0	0	0	0
ENSGALG00000006174	0.250242	0.657207	0.243468	0.154126	0.375131	0.674313	0.570287	1.13712	0.328251	0.821513	0.313331	0.444255	0.949368	0.215555	0.59408
ENSGALG00000007625	6.9006	24.3541	11.1897	13.0566	9.86233	28.1988	13.6347	8.60478	6.99977	9.19489	6.69468	6.54059	9.12092	6.21274	8.51503
ENSGALG00000008727	0.601102	0.474787	0.58996	0.340996	0.177848	0.15704	0.637797	0.78726	0.804049	0.491968	1.38645	0.673981	0.966862	1.54426	1.45206
ENSGALG00000004878	0.65174	0.86302	1.24333	1.56433	1.79596	2.14768	1.24333	1.61766	0.785763	1.25858	1.06292	0.748669	1.49486	0.935667	1.15285
ENSGALG00000014366	6.72835	13.6492	9.36985	12.8727	8.31447	15.4865	0	0.0241845	0	7.47348	6.77729	7.65898	9.87023	7.75007	8.68533
ENSGALG00000017177	9.92785	5.97177	7.65554	7.64331	8.24	7.99652	13.7623	12.7259	8.84695	6.57244	5.64596	5.26831	9.26823	6.50674	8.24058
ENSGALG00000003270	0.104142	0.130241	0.281452	0.267258	0.130097	0.369244	0.638974	0.112673	0.0569194	0.239919	0.124188	0.277325	0.0365827	0.0249185	0.109882
ENSGALG00000006766	3.64268	5.84227	4.61045	4.55991	3.85579	5.58025	5.70329	4.48262	5.09511	3.60339	4.05371	4.13434	4.49811	4.23158	4.02684
ENSGALG00000012303	0	0	0	0	0.0717662	0.0271585	0	0	0	0	0	0	0	0.0274919	0.0303076
ENSGALG00000007298	9.58079	19.2758	14.6424	20.69	19.2096	24.2882	17.1733	13.7345	13.0387	10.3462	10.8394	13.0117	17.0127	10.4191	16.4522
ENSGALG00000006963	12.4921	15.6507	14.8307	14.9072	14.5466	22.5256	13.2177	16.5082	11.5582	12.1797	9.25724	17.2666	12.2243	16.7173	16.876
Novel01516	23.3666	30.7145	35.622	24.3239	29.2929	35.823	26.6832	34.3605	34.4011	29.0006	28.4039	35.9321	30.347	32.6011	37.2422
ENSGALG00000008875	2.23395	2.7938	2.5975	1.93321	1.84966	2.3455	2.15542	2.45443	2.51295	3.11184	2.67944	4.28874	3.75944	3.26931	5.16641
ENSGALG00000017394	12.158	17.7141	16.7927	19.2015	27.6898	15.982	6.27607	10.5024	8.58864	47.2863	21.2746	38.8173	33.4746	22.1804	73.6225
ENSGALG00000001333	10.2907	10.0264	13.7117	7.67701	8.96889	10.3803	13.495	15.406	12.8512	13.5766	12.3786	10.2321	15.8887	12.9986	13.2883
ENSGALG00000021212	4.17313	5.70116	4.9281	10.756	9.26473	7.78408	3.41926	3.53348	3.42128	5.95646	4.70595	5.71748	8.03074	6.96795	4.52281
ENSGALG00000016462	1.53744	2.83438	3.05181	2.24486	2.98025	4.58645	3.53161	3.95771	1.9124	3.52663	4.03026	3.15294	4.46952	1.40805	3.23038
ENSGALG00000028221	2.36944	4.01929	2.16632	4.15296	5.85694	3.11017	2.34198	1.2545	0.619961	4.48595	1.57808	1.96898	1.00942	0.796135	1.87503
ENSGALG00000028169	0	0	0	0	0	0	0	0	0	0	0	0	0	0.505291	0
ENSGALG00000027867	0	0	0	0	0	0	0	0.097628	0	0	0	0.0400489	0	0	0
ENSGALG00000015338	13.9043	12.8071	16.991	14.9404	19.9626	12.9099	14.0724	13.0412	13.6135	15.5553	15.7457	15.9827	18.9222	12.494	23.2726
ENSGALG00000007930	14.1381	20.1768	13.0009	16.1204	18.7124	25.8634	15.7178	16.7291	17.5184	13.9148	13.9251	11.8189	14.3711	14.0282	14.3604
Novel01100	40.6651	31.0167	36.8198	27.222	38.0999	35.5304	34.1258	39.6451	39.6583	35.4206	45.8615	37.8813	34.4953	48.5569	38.8988
Novel00226	112.961	75.0865	138.631	133.811	167.247	80.5786	95.48	154.767	105.273	140.174	89.2556	145.814	68.5092	63.3453	172.722
Novel00765	0.146764	0.516219	0.0892443	0.734444	0.412517	0.624435	0.482403	0.23818	0.150402	0.158489	0.0984452	0.423393	0.425327	0.500413	0.5807
ENSGALG00000008620	505.608	693.865	531.731	547.524	691.766	555.197	500.746	582.999	476.675	510.185	448.571	470.577	473.219	516.173	527.969
ENSGALG00000007666	0.438809	0.411584	0.889438	0.337833	0	0	0	0.237378	0.449688	0.189546	0.196228	1.07115	1.73412	0	0
ENSGALG00000012438	21.2559	27.9387	21.1301	19.6375	21.8333	29.44	22.9555	22.4281	22.1472	21.0901	21.452	20.8997	17.8452	22.3409	19.881
ENSGALG00000027607	72.328	59.505	57.2863	117.533	155.894	91.1596	73.2686	66.3534	66.0779	76.472	89.7128	64.9049	80.3943	68.2774	66.4273
ENSGALG00000015061	2.97642	4.30485	3.4448	3.2186	3.61887	4.58376	3.58472	3.81022	3.93966	2.67932	3.17002	3.38823	3.86693	3.28635	3.31728
ENSGALG00000027373	0	0	0	0	0	0	0	0	0	0	0	0	0	0	0
ENSGALG00000007161	0.832034	1.67482	1.09148	1.13719	1.24377	1.82969	1.31108	1.2542	1.00403	0.839952	1.12875	0.995804	1.40883	0.919366	1.40562
Novel00087	1.74112	1.9994	1.76787	3.47018	2.69849	2.86164	2.48173	2.48234	1.44077	2.05243	2.32852	1.71883	1.56048	1.13301	0.965762
ENSGALG00000012952	7.13691	71.0159	18.2818	15.4486	13.2765	44.5212	29.1929	13.3169	7.12306	11.3484	9.06571	8.99764	7.84811	4.90029	8.26696
ENSGALG00000011046	6.43936	11.2989	8.39707	5.86238	3.83094	8.10814	9.46423	4.42384	4.99818	8.54552	5.1022	7.12857	5.52169	6.36227	6.607
ENSGALG00000016995	4.92894	7.23623	4.64783	9.07434	4.869	8.51004	6.38653	4.17344	5.5343	3.8879	5.31868	4.28006	5.0249	4.23034	4.53642
ENSGALG00000003084	15.8999	26.6361	19.8465	26.7596	22.4493	29.5244	20.8723	19.4427	17.8856	17.3778	15.0801	17.7896	22.6009	16.9341	17.4395
ENSGALG00000021775	0	0	0	0	0	0	0	0	0	0	0	0	0	0	0
ENSGALG00000025761	0	0	0	0	0	0	0	0	0	0	0	0	0	0	0
ENSGALG00000018290	0	0	0.963094	0	3.33881	0	1.04119	0	1.94771	0	0	0	0	0.852678	0
Novel00882	18.2418	7.7936	8.36295	0.735295	0.894824	0.474079	9.29219	10.0231	10.3356	2.5578	1.8792	1.18687	15.6005	5.41601	16.1738
ENSGALG00000017218	9.39535	10.1966	9.01339	8.38841	8.96398	11.7726	8.96814	10.4577	10.3239	7.07561	9.6567	7.79398	8.03494	10.2399	9.43962
ENSGALG00000024379	5.81123	12.4694	7.42238	17.4669	8.0551	33.1925	10.885	5.77053	3.98108	7.7713	4.4142	4.59304	7.13076	6.74285	5.79557
ENSGALG00000006572	17683.1	9109.44	16388.5	8056.99	9496.91	6330.41	13693.8	14738.9	17382.8	17691	14298.7	17742.8	15499.5	14772.2	19455.8
ENSGALG00000012755	0.0953872	0	0.154675	0	0.0893701	0.0676406	0	0.309604	0	0.164813	0.255933	0.338682	0.402089	0	0.0754837
ENSGALG00000017833	0	1.10553	1.91126	0.907434	2.20862	2.08952	2.58279	0	0.483153	0	0	0	0	0.423034	3.73089
ENSGALG00000026809	121.131	117.259	118.858	111.908	87.4552	106.174	102.106	114.65	110.144	113.083	130.195	90.5192	96.6056	132.459	132.661
ENSGALG00000026264	166.704	76.5246	226.794	33.6494	30.2781	18.2203	81.4954	130.59	108.873	112.59	145.699	116.938	41.5934	188.623	113.823
ENSGALG00000014687	0	0.109647	0.0157965	0.0149999	0	0.0276318	0.0683095	0	0.015973	0	0	0	0	0.027971	0.0154179
Novel00956	1.3087	1.78546	2.4115	3.11425	1.44908	3.29026	1.35566	1.93079	1.75568	1.1306	1.59608	1.47849	1.62991	1.70803	1.50637
ENSGALG00000024077	3.32811	8.69598	3.7006	9.51699	6.59271	12.3732	5.3342	5.29826	4.17071	5.54503	2.93403	3.75605	5.31101	3.41285	5.07922
Novel00576	0.69191	0.243369	1.26221	0.466105	0.729296	0.919958	0.60647	0.748592	0.283626	0.971344	0.92823	0.537402	1.91404	0	1.16351
ENSGALG00000014991	15.7346	32.9962	18.8715	23.6942	22.6478	32.2879	26.1184	20.5519	16.5425	17.6432	16.7704	16.4273	21.9944	19.5755	19.9997
ENSGALG00000014078	16.4953	11.7843	18.4672	14.4432	10.6101	13.5153	10.413	16.5983	13.7686	24.4769	20.5622	28.184	14.0507	19.4175	31.5851
ENSGALG00000028091	4.67034	4.9684	4.60924	7.37506	8.4439	6.44375	6.01619	7.89421	5.8351	3.22266	4.45723	4.09265	6.28979	3.25608	4.7231
ENSGALG00000028374	0	0	0	0	0	0	0	0	0	0	0	0	0	0	0
ENSGALG00000027082	8.26985	8.25543	6.08239	7.59474	9.40851	7.12092	8.18063	6.26313	5.85978	10.0532	9.56232	8.96618	7.03429	7.97158	5.60937
ENSGALG00000002548	13.1241	43.7415	19.7624	38.706	41.0516	47.3045	31.1166	23.1667	19.7272	18.5757	15.6238	13.5582	18.4377	15.8636	15.0948
ENSGALG00000017204	0.741242	8.77758	1.95319	2.28269	2.4741	8.47573	3.61401	2.35577	1.02549	1.48085	1.20158	2.1795	1.70875	0.798119	1.24647
Novel00953	0.382509	0.358777	0.465193	4.49094	5.64448	2.78024	0	0.413844	0.235195	0	0.598679	0.339534	0.503875	1.16694	1.1351
ENSGALG00000006796	1.34275	1.66692	2.2734	3.13171	2.3311	4.25676	3.0116	3.37552	1.16559	1.91063	2.08394	1.99818	3.66245	1.0489	2.18766
ENSGALG00000028769	4.12531	5.25129	0.716721	3.40288	0.828232	4.80589	4.90729	2.86924	3.14049	2.80022	1.31769	1.83092	6.21055	3.17276	2.56498
Novel01711	22.8537	25.1543	25.6195	9.42576	10.9245	11.741	22.7911	21.0675	27.9132	23.6722	27.3223	20.1826	31.088	36.1577	35.8011
ENSGALG00000024095	0	0	0	0	0	0.100766	0	0	0	0	0	0	0	0	0
ENSGALG00000023437	3.55583	7.87112	3.97851	9.85529	7.06283	8.11921	5.29846	6.77094	3.84805	6.94255	4.45229	6.18641	6.59516	4.13497	4.95241
ENSGALG00000010652	41.0508	42.833	39.8974	38.7361	39.6489	49.6226	34.6712	34.8136	28.512	34.5658	30.5517	36.5253	47.508	28.9539	41.8989
ENSGALG00000006365	0.477385	0.111942	0.338671	8.68295	5.59089	4.40078	0.209218	0.129123	1.46766	0.0515524	1.06739	0.158907	0.0628855	1.15654	0.661105
ENSGALG00000026066	0	0	0	0	0	0	0.716515	0	0	0	0	0	0	0	0.646887
ENSGALG00000011678	4.19471	6.9785	5.35205	7.64869	7.11556	9.90208	5.74731	4.06063	6.30779	3.17565	3.50479	3.59605	4.80441	3.66873	3.78242
ENSGALG00000006277	10.6712	10.4378	9.57826	9.28872	8.77772	10.1597	9.67392	12.9546	12.7951	9.49535	11.8533	10.9529	11.0289	11.121	9.99963
ENSGALG00000010620	8.92936	11.2447	9.88756	8.11584	9.02453	11.9604	9.60223	9.0347	11.5909	8.82132	7.24665	9.28386	11.7626	8.60561	12.1041
ENSGALG00000001496	4.98515	8.47501	6.8206	7.19625	7.88178	10.1633	7.10054	3.70806	5.10875	3.7684	4.45855	2.4891	3.28345	4.47307	3.20527
ENSGALG00000026565	84.1501	78.6244	75.6063	54.4941	62.6623	56.4739	72.6904	84.8892	89.576	75.1556	77.1506	69.8628	67.8268	75.9508	82.2183
ENSGALG00000013627	5.84797	3.94699	6.4222	2.40597	2.60908	2.63295	5.61401	8.00086	7.02666	6.06791	10.5158	8.18467	6.91275	8.32897	10.5287
ENSGALG00000002301	13.8177	21.0962	15.2048	11.2874	12.2827	18.7402	17.3686	13.5077	14.521	10.8219	16.3254	11.7847	16.1198	15.3078	13.7444
ENSGALG00000025641	0	0	0.733786	0	0.847952	0	0	0	0.741985	0.781878	0	0.803361	0.953764	0	1.43239
ENSGALG00000009354	2.40179	3.20689	2.74914	3.33926	4.302	4.99923	3.62838	3.65325	3.88022	3.84473	1.83218	3.08505	3.97529	3.88419	4.06958
ENSGALG00000021837	0	0	0	0	0	0	0	0	0	0.0640134	0	0	0	0	0
Novel00527	0.15348	0.287915	0.207396	0.512035	0.26363	0.489757	0.156949	0.30443	0.209713	0.154692	0.183022	0.204354	0.053914	0.275428	0.141697
ENSGALG00000024261	51.8218	45.657	50.9955	54.2135	44.1972	62.3451	38.2317	44.6762	47.1935	41.6983	40.1109	48.3057	49.8565	50.0565	49.6649
ENSGALG00000013239	1.42433	2.05961	2.12918	6.87642	3.76713	6.34416	3.0561	2.10284	1.52046	1.78166	2.22927	1.67257	2.14206	0.937214	2.39515
ENSGALG00000015910	0.157616	0.574924	0.156189	0.471903	0.574287	0.732703	0.44516	0.47369	0.0430731	0.151296	0.0469888	0.124363	0.0922784	0.125712	0.0831521
ENSGALG00000013548	0.2302	5.39796	0.886543	0.841832	0.862716	3.91773	2.01774	0.996234	0.188726	0.298309	0.72059	0.613011	0.424537	0.206553	0.81975
ENSGALG00000025876	1.07581	1.51359	2.18059	4.55536	4.78773	5.72153	1.49302	0.290984	1.02898	3.09801	1.28288	2.46692	0.472383	0.386118	0.425664
ENSGALG00000009378	1.60194	4.25009	1.37303	5.53229	3.21619	6.39385	2.60767	2.67404	1.16323	1.81889	1.59646	1.05632	1.83288	1.21562	1.81097
Novel00135	0.776279	1.40769	0.0419592	0	0	0	3.35674	0.111983	0	0.268255	0.138855	0.0918752	3.21774	0.111446	0
ENSGALG00000003307	54.0006	90.9182	53.6295	59.1509	51.2063	100.433	60.6393	55.7631	49.4077	58.2069	47.9181	51.5841	52.8977	56.613	62.1983
ENSGALG00000020292	0	0	0	0	0	0.0381391	0	0	0	0	0	0	0	0	0
ENSGALG00000026404	0	0	0	0	0	0	0	0	0	0	0	0	0	0	0
ENSGALG00000028323	0	0	0	0	0	0	0	0	0	0	0	0	0	0	0
ENSGALG00000006612	2.12323	3.08407	1.98447	3.3147	2.8458	4.45413	2.09368	1.96217	1.34179	1.75786	1.68795	2.21189	1.818	1.5241	1.43517
ENSGALG00000008765	7.57807	12.0743	7.79829	9.68635	6.73593	10.9541	9.15445	8.67189	8.92089	7.84776	6.25621	9.01202	9.00987	5.92788	7.26539
ENSGALG00000018595	10.7609	13.738	11.1482	6.90387	11.7624	14.9081	9.08274	9.59422	8.57707	8.86607	6.59433	6.10259	14.0702	13.2316	6.93857
ENSGALG00000025282	0	0	0	0	0	0	0	0	0	0	0	0	0	0	0
ENSGALG00000008049	3.33646	7.82365	6.47296	7.79782	8.37319	9.29475	8.04226	4.899	4.39609	7.10308	5.75488	5.92321	4.52066	4.10569	8.01512
ENSGALG00000027892	3.56524	10.6223	8.92689	9.20326	8.6456	20.969	9.5588	6.35322	6.79147	9.51195	4.68916	11.0764	14.2551	7.82817	10.8704
ENSGALG00000004559	1.10983	1.68394	0.87336	2.56334	2.01848	2.17583	0.972787	1.0948	0.749313	0.8178	0.846626	1.24592	1.61677	1.03098	1.05907
ENSGALG00000002001	1.06221	2.18238	1.10727	2.43386	2.20366	3.81994	1.30789	1.36812	0.80863	0.939503	0.723809	1.07756	0.692954	1.05294	0.940634
ENSGALG00000017170	1.52958	1.83152	1.26654	1.57849	1.03671	1.47697	1.28365	2.07742	1.78762	2.64286	1.57175	2.02216	1.54333	1.70536	2.80715
ENSGALG00000000944	24.8519	44.4562	27.2058	30.839	36.3508	45.8045	29.7793	36.7579	29.401	27.9017	26.0717	27.7376	36.6877	27.775	29.043
ENSGALG00000028423	7.04448	5.66752	8.17313	3.84593	4.41409	6.32109	5.96485	8.17176	7.3203	7.33917	7.0628	8.41703	5.29589	6.45237	6.93568
ENSGALG00000023099	0.0550497	0	0	0	0	0.0780732	0	0.0297797	0	0.0237791	0.098469	0	0	0	0
ENSGALG00000020819	0	0.0265279	0.0458616	0.0870975	0.0794955	0.0401113	0	0.0305995	0.0463741	0.0244337	0.15177	0.0502101	0.0298051	0	0.0223811
ENSGALG00000008317	0	0.168707	0	0.0153863	0.037449	0.212577	0.0700693	0.129734	0.0491536	0.155389	0	0.0532195	0.0842441	0.071729	0
ENSGALG00000028088	0	0	0	0	0	0	0	0	0	0	0	0	0	0	0
ENSGALG00000006921	35.0323	31.2215	41.5801	43.9782	46.301	36.2385	43.6325	37.4463	35.7774	31.2008	35.423	29.6537	38.1234	45.5842	39.4878
ENSGALG00000005205	6.67353	18.7053	10.157	6.61011	7.27637	14.2799	11.5279	7.76914	8.63872	7.82199	9.21464	10.8429	6.95053	9.18862	10.9635
ENSGALG00000025619	0	0.445669	0	0.731619	0	0	0	0	0	0	0	0	0	0	0.376003
ENSGALG00000000745	0.0941274	0	0	0.169091	0.0293966	0.111245	0.110006	0.0678923	0	0.027106	0	0.0278507	0.0991946	0	0
ENSGALG00000004490	1.69696	3.82002	2.14021	5.31295	5.65301	6.07017	2.57817	2.77436	1.76221	3.06236	2.63068	2.44356	3.93428	3.14002	3.61083
ENSGALG00000004340	0.123375	2.26812	0.560164	0.98784	1.2484	0.279959	2.29257	0.0800892	0.202294	0.0639511	0.0220684	0.131416	0.0520066	0.15941	0.234316
ENSGALG00000025893	5.3252	6.35056	6.9903	4.58787	3.59941	5.70024	6.79028	5.61056	9.14735	5.48775	11.5098	11.1983	6.81442	11.413	7.80602
ENSGALG00000005126	5.72923	7.29498	6.13733	7.77041	8.31595	9.57784	8.22215	6.35916	6.81433	6.20618	6.55769	5.6389	5.03659	4.75183	5.30897
ENSGALG00000026933	0	0	0	0	0	0	0	0	0	0	0	0	0	0	0
Novel01233	1.27152	0.439392	0.868141	2.47308	3.38584	3.70154	2.34633	1.44809	0.987572	2.3126	2.21456	1.18807	1.48102	1.82545	1.69466
ENSGALG00000016841	70.3453	126.658	97.6316	156.765	171.607	282.36	159.062	137.429	90.0468	104.912	99.5759	80.7184	96.8441	37.1136	91.1321
ENSGALG00000026763	0.811509	1.00335	0.927113	2.1015	2.31551	3.08653	0.743632	0.518811	0.756026	2.86803	0.824756	2.42295	2.2546	1.42982	1.63464
ENSGALG00000029009	117.555	153.838	99.3057	119.769	127.947	121.796	104.273	132.516	97.5298	181.222	135.986	156.834	137.978	130.365	147.059
ENSGALG00000027171	0	0.25086	0	0.154431	0	0.142242	0	0.0723409	0	0	0	0	0	0.0959919	0.0529116
ENSGALG00000013247	0.111882	0.472232	0.0907109	0.21534	0.26206	0.396686	0.147099	0.121047	0	0.144984	0	0.0993117	0.176857	0.0803111	0.221341
ENSGALG00000025973	41.8841	62.7086	43.8258	33.0978	34.7995	48.5298	44.7472	44.4603	46.1296	41.3729	51.3127	37.5993	43.6391	49.3525	46.0272
ENSGALG00000008084	139.157	90.7992	138.703	164.787	241.863	117.83	142.264	132.058	163.473	172.186	151.278	151.465	164.113	129.285	142.873
ENSGALG00000001994	0	0	0	0	0	0	0	0.0531341	0	0.0424275	0.131769	0.174373	0.155264	0	0.272044
ENSGALG00000012437	0	0.0206987	0	0	0	0	0	0	0	0	0.0197367	0	0	0	0
ENSGALG00000011492	1.15668	3.21975	1.16469	2.21191	1.52069	3.92911	2.22392	1.31199	1.34595	1.45055	1.53505	0.861124	1.29759	0.977598	1.07772
ENSGALG00000006623	9.15409	17.7587	9.19592	7.76955	9.4343	16.8299	11.468	7.80242	5.3266	7.05964	7.24858	7.47161	7.15281	7.06784	6.28991
ENSGALG00000013001	0.0124323	0.081627	0.0302394	0.0765717	0.0815365	0.0705276	0.15256	0.0269016	0.101924	0.0537022	0.0444761	0.0441422	0.0393047	0.0267726	0.0393528
ENSGALG00000022950	126.084	97.1175	131.343	107.484	132.26	98.1176	108.198	113.874	111.016	112.552	114.573	116.335	146.634	137.377	142.712
ENSGALG00000014584	1.2877	1.44008	1.08419	1.75398	0.974454	2.17745	0	0	0	1.02688	1.10738	1.09906	1.25263	1.35095	1.01901
ENSGALG00000026919	0.93146	1.22057	0.755205	0.61166	1.50156	0.971344	1.53683	0.978127	0.651343	0.958541	0.808564	0.9484	1.24144	0.678455	1.21405
ENSGALG00000020376	23.9806	21.775	29.578	42.6205	57.6038	29.2161	32.3117	30.2233	34.196	39.01	22.3601	34.9866	44.3596	23.5316	30.1812
ENSGALG00000001971	18.5443	18.9599	22.951	14.2013	14.356	15.6435	17.6318	17.9806	21.0655	18.0402	23.613	19.2333	14.512	21.2363	18.328
ENSGALG00000002267	4.39443	6.33725	4.85444	5.03252	4.94067	7.05031	5.77768	4.16012	5.04378	3.32185	4.27412	5.461	4.28367	4.25846	4.25992
ENSGALG00000001027	0	0	0	0	0	0	0	0	0	0	0	0	0	0	0
ENSGALG00000006530	5.68369	10.4683	7.81996	9.94498	7.81022	11.4317	8.09171	7.00648	7.90733	7.49923	5.54541	6.78798	7.29649	6.9976	10.9854
ENSGALG00000003403	0.314797	0.0984224	0.552998	2.3428	1.22892	1.11614	0.781787	0.737937	0.774245	1.35979	0.750784	0.652003	1.10581	1.43113	0.705817
ENSGALG00000007381	19.681	113.195	27.1561	76.0404	107.085	139.598	72.0978	37.8672	22.3082	37.5045	36.8759	41.0241	36.2274	26.2047	26.7106
Novel01035	0.66364	0.783847	1.13591	0.0567696	0.437546	0.104577	2.88691	0.771192	0.463471	4.03452	3.89096	3.94901	1.39873	0.529306	1.06978
ENSGALG00000010192	3.39612	6.9847	3.25543	4.9569	4.32538	7.24982	3.75195	4.1719	4.45191	2.55193	2.84754	3.6269	3.44846	3.50435	2.96743
ENSGALG00000006717	0.0581487	0.0109082	0.0188582	0.0179071	0.0108961	0.049481	0.0203873	0.0125825	0	0.0100471	0.0104012	0.0103231	0.0735348	0.0584366	0.0276092
ENSGALG00000008950	9.73701	9.21098	9.21028	14.4161	20.9356	25.3466	7.69577	8.64384	8.28976	7.54917	8.07578	7.71965	11.2698	9.0803	11.4262
ENSGALG00000011098	19.0156	16.5983	22.1821	19.1513	16.1435	17.392	17.1437	21.665	21.4119	16.2267	16.9722	20.2206	18.0353	21.1154	18.7023
ENSGALG00000021908	0	0	0	0	0	0	0	0	0	0	0	0	0	0	0
ENSGALG00000004887	6.34488	8.46838	7.63093	7.89543	7.79449	9.96362	7.69522	6.76097	7.24474	4.85214	5.89751	6.09144	6.42384	6.50839	6.34067
ENSGALG00000009871	3.62078	4.6802	5.03104	4.34391	3.60815	4.01917	4.14932	6.15987	6.23058	5.07339	4.46267	4.28153	5.89208	4.8859	6.76325
ENSGALG00000005099	0	0.0877085	0	0	0	0.0663094	0	0	0	0	0	0	0.295632	0.335618	0
Novel00372	2.80154	3.58327	6.19478	7.45099	9.18685	8.30767	4.91119	4.95989	3.2364	4.62055	3.87229	5.42571	3.89174	4.57047	3.62777
ENSGALG00000025412	0	0	0	0	0	0	0	0	0	0	0	0	0	0	0
ENSGALG00000012670	14.3408	10.8176	8.5803	2.89322	8.98443	5.88104	15.5231	13.9267	11.0842	14.8895	11.242	11.2726	13.9748	18.1698	16.5441
ENSGALG00000020779	0	0.087386	0.151074	0.286909	0.174578	0.46246	0.163323	0.100798	0.458285	0.160975	0	0.165398	0	0.133753	0
ENSGALG00000006877	0.0613919	0.0959717	0.0331833	0.110284	0.0766923	0.145113	0.0896849	0.0664212	0.0335541	0.0176791	0.0915112	0.0363296	0.129394	0.0881369	0.0809698
ENSGALG00000012603	1.83928	13.7055	3.14818	2.28139	1.53178	14.0571	4.20952	4.86434	2.26186	3.61934	3.47275	5.62353	5.81488	4.76766	2.50669
ENSGALG00000017212	0.0577248	0.0541435	0.0468019	0.133325	0.108167	0.122801	0.101193	0.124907	0.0473248	0.498692	0.103254	0.204958	0.304162	0.165745	0.09136
Novel00860	0.443238	0.523524	0.598944	0.0631932	0.0461421	0.23282	0.115113	0.479549	0.148045	0.482195	0.895609	0.495443	1.1764	0.400654	0.766459
ENSGALG00000014300	0.043134	0.0404579	0.139888	0.249062	0.46475	0.382337	0.0378076	0.116669	0.159132	0.074528	0.212176	0.114864	0.068184	0.061925	0.0341336
ENSGALG00000015469	2.29594	17.5299	10.0555	15.0165	19.4203	16.4939	15.5352	5.85024	4.25715	3.29965	3.78058	2.97128	10.1304	1.50945	5.19591
ENSGALG00000007116	2.65419	0.800203	2.03667	0.510856	0.222032	0.60497	0.830871	0.974302	0.971427	1.6788	1.35647	3.70227	1.64827	3.06199	1.61278
ENSGALG00000002091	0.20729	0.874932	0.336131	1.39641	0.97107	2.53562	0.726772	1.12136	0.594802	0.582012	0.78792	0.552003	0.600735	0.520791	0.410092
ENSGALG00000006007	0	0	0.0390609	0	0.135414	0	0.126684	0.208496	0	0	0.086176	0.0427645	0.0507707	0	0
ENSGALG00000006398	36.9383	44.6379	47.4225	37.5292	38.1155	41.3203	30.5676	43.1508	44.6577	41.4707	33.4056	38.9208	43.0458	33.3514	38.379
ENSGALG00000019768	20.9239	20.8874	17.3079	20.0979	13.8162	16.3742	18.3183	20.1856	18.9513	19.1524	16.664	16.0525	10.1326	10.9429	19.8498
ENSGALG00000027418	49.2658	28.0504	53.4707	83.25	93.7908	51.7889	45.2517	54.4938	69.424	53.7116	54.7603	33.6713	44.1219	38.0757	46.833
ENSGALG00000023648	99.7827	77.6853	90.938	62.3332	61.086	61.3298	88.9208	94.1434	119.443	80.6165	86.0151	97.0474	90.4122	113.606	118.937
ENSGALG00000006508	43.6585	18.9248	27.2458	12.9359	12.581	10.0104	21.7291	21.4569	19.9852	32.6604	25.4357	37.8977	27.9391	45.4267	36.7829
ENSGALG00000010529	0.111854	0.839317	0.211607	0.86115	1.60691	1.50704	0.849697	0.685766	0.275106	0.450951	0.233423	0.529533	0.235751	0.21411	0.295049
ENSGALG00000009532	2.27272	6.7231	2.63237	4.15321	3.20573	6.85381	4.31251	2.62103	2.25228	2.8049	1.96563	2.06171	1.89499	1.61348	1.79849
ENSGALG00000024260	0	0	0	0	0	0.0971344	0	0	0	0	0	0	0	0	0
ENSGALG00000015384	0.0251069	0.0235492	0	0.0193294	0.0235231	0.0712147	0	0.0543273	0.0205835	0	0	0.0445722	0	0	0.0198681
ENSGALG00000010859	0.0677874	0.0635818	0.0549604	0.0521886	0.190534	0.192277	0.118833	0.110011	0.0555744	0.0292812	0	0.0601715	0.0357183	0.072989	0.0804644
ENSGALG00000001800	4.3595	6.34876	5.79794	8.3908	5.94761	8.40642	4.49155	5.00626	3.73083	3.96445	4.00159	4.85411	4.15089	4.63912	4.75111
ENSGALG00000014013	5.56398	10.6181	6.14252	5.32086	5.13104	8.73471	7.08533	4.25929	5.79517	8.58573	7.62083	6.32113	16.4104	4.60937	7.36603
ENSGALG00000015458	4.53931	5.36839	3.84038	7.50612	7.10061	16.2065	5.4319	4.356	3.23607	4.43308	2.47118	4.62496	4.70048	2.91841	3.4672
ENSGALG00000025551	0	0	0	0	0	0	0	0	0	0.6439	0	0	0.785452	0	0
Novel01620	1.93626	4.39695	2.80924	4.62901	2.86439	6.79289	3.03702	1.98462	1.42031	2.55316	1.45829	1.89964	3.00704	2.48717	3.30641
Novel00251	0.076908	0.288546	0.280598	0.414473	0.43234	0.654441	0.101117	0.208021	0	0.0664419	0.206352	0.170668	0.405241	0.0276031	0.121721
ENSGALG00000021854	0	0	0	0	0	0.12508	0	0	0	0	0	0	0	0	0
ENSGALG00000005808	2.30899	1.94917	2.10608	10.266	3.51543	4.2571	2.27685	2.18588	1.65637	1.54595	1.96183	1.53718	3.34578	1.90606	1.91856
ENSGALG00000004819	2.60788	3.38498	3.45993	3.40712	2.73954	3.21291	2.88617	2.82152	2.69953	2.02541	3.06274	2.4318	2.22082	2.32581	2.23048
ENSGALG00000027766	0	0	0	0	0	0	0	0	0	0	0	0	0	0	0
ENSGALG00000004751	0.933325	2.86501	0.687925	1.33912	1.31168	2.16601	1.37585	0.780288	0.799953	0.769662	0.531194	0.677836	0.983569	0.54815	0.268574
ENSGALG00000016306	4.44376	11.4148	5.85469	8.24195	5.36989	10.3665	6.81629	5.90048	5.48542	6.12934	4.20016	5.10992	5.74729	4.96598	6.29378
ENSGALG00000006632	1.54717	2.64627	1.67254	2.54578	1.90434	3.50649	1.78157	1.64109	1.69123	1.52008	1.79071	1.77727	2.14197	0.849276	1.05629
ENSGALG00000004399	35.0897	28.7669	28.3105	18.4701	18.8193	21.4001	27.0116	28.1876	33.1765	24.014	26.7491	29.2511	24.2212	42.0038	23.8816
ENSGALG00000028725	0	0	0	0	0	0	0	0	0	0	0	0	0	0	0
ENSGALG00000005831	0.081922	0.0768394	0.0442802	0	0.0511695	0.154913	0.119677	0.0886332	0.0895499	0.0943646	0.0732682	0.121197	0.0863321	0.0784072	0
ENSGALG00000006394	0.0527942	0.198075	0.214021	0.081291	0	0.149749	0.370199	0.114238	0.0865649	0.182438	0.283304	0.140588	0.389454	0	0.376003
ENSGALG00000008865	50.5722	44.0243	44.4866	44.088	44.3626	30.2362	35.4184	64.192	52.368	50.115	41.5348	46.4308	56.0813	62.4605	67.8114
ENSGALG00000002980	0.636386	1.07902	0.436586	0.263816	0.206391	0.607481	0.879611	0.953334	1.04346	0.655509	0.328362	0.260717	0.541674	0.474381	0.503597
ENSGALG00000012203	197.197	119.843	173.314	147.692	117.735	127.448	179.632	168.186	211.797	216.836	226.364	205.602	190.641	260.728	210.562
ENSGALG00000010622	12.1735	13.1595	12.7076	6.63084	6.64376	9.77623	12.8577	10.9647	13.9474	11.8315	12.2485	14.1286	12.1233	10.1147	11.8491
ENSGALG00000027089	3.87694	10.7838	5.45565	4.80312	7.26475	11.3444	3.2029	5.59272	1.79016	4.81226	6.2174	6.0916	5.9641	2.30313	5.60699
ENSGALG00000027847	0	0	0	0	0	0	0	0	0	0	0	0	0	0	0
ENSGALG00000006123	0.278903	0.548515	0.539789	0.360182	0.522619	0.701781	0.30755	0.301751	0.265534	0.194313	0.16093	0.26354	0.31288	0.329366	0.213588
ENSGALG00000011326	2.27259	7.6636	6.44896	6.04041	6.23561	8.55646	6.45016	5.62004	3.01653	4.76807	4.64577	4.03453	4.16262	3.84525	4.06779
Novel01765	0.225292	3.38104	0.811828	0.982879	0.304894	2.68039	1.62366	0.622913	0.32836	0.259511	0.156717	0.311081	0.474841	0.179689	0.515039
ENSGALG00000016411	0.150047	0.539494	0.283859	0.356183	0.257733	0.842337	0.317836	0.311149	0.18452	0.23765	0.313125	0.177585	0.329425	0.0987312	0.247371
Novel00386	25.1589	63.9967	38.8009	42.7392	50.8588	92.2086	30.2019	35.3563	23.2044	35.6739	21.5229	33.7412	41.6431	23.9486	32.3525
ENSGALG00000028164	0.0414185	0.097122	0.100743	0	0.0388057	0.0734263	0	0.0448115	0	0.035782	0.0185216	0.0735302	0.0218241	0.0594622	0
ENSGALG00000010535	11.9052	10.4974	13.846	17.37	13.1176	23.1131	18.7987	14.183	14.9511	3.50538	7.89594	7.12423	4.13503	4.86502	5.29272
ENSGALG00000027174	8.42143	5.62665	2.61892	10.3914	7.99828	8.75315	9.80832	9.36095	10.2144	12.1589	2.57939	9.2161	11.6709	2.23585	4.10808
ENSGALG00000017792	0	0	0	0	0	0	0	0	0	0	0	0	0	0	0
ENSGALG00000003135	7.93275	6.672	7.8735	10.812	11.4507	7.93715	11.1174	8.33739	9.65525	8.35187	11.2503	11.8467	12.2181	15.2307	11.5754
Novel00961	3.7358	1.75201	2.0445	3.30756	1.13755	0.993419	2.78332	3.63766	2.60333	0.726167	0.751764	2.23836	2.75584	3.55318	8.20371
ENSGALG00000015794	5.20575	4.76762	6.37086	3.38397	4.6473	5.38051	3.37914	5.41968	4.44903	3.52148	4.74369	4.90424	2.35484	3.26089	2.91475
ENSGALG00000025169	0	0	0	0	0	0	0	0	0	0	0	0	0	0	0
ENSGALG00000028730	0	0.466059	0	0	0	0	0	0	0	0	0	0	0	0	0.786412
ENSGALG00000025614	3.482	9.79791	6.58727	7.59543	4.89352	9.05351	1.52601	3.76725	1.90311	0.501357	2.59515	2.57566	6.11574	7.08179	4.13317
ENSGALG00000000399	0	0	0	0	0	0	0	0	0	0	0	0	0	0	0
ENSGALG00000020575	0.766859	2.32132	0.876102	0.590394	0.751143	2.54594	0.794375	0.603404	0.228617	0.602272	0.18705	0.340351	0.551005	0.0500426	0.220671
Novel01399	24.6001	37.6716	31.5168	31.1973	37.6299	41.5002	26.9058	33.3662	18.404	30.6703	21.5525	26.9293	29.6279	31.5073	35.8125
Novel01153	19.0968	147.902	23.3723	53.5587	44.8157	111.624	50.1363	35.5177	13.6433	25.3755	32.5325	24.6197	26.2582	30.1579	22.1644
ENSGALG00000001802	28.0381	28.5083	41.557	30.0225	23.8007	32.4007	27.9993	24.9689	41.1064	31.3459	39.2709	42.8833	32.9448	18.6689	31.4356
ENSGALG00000003242	0.260652	0.285228	0.281774	0.468236	0.24421	0.400471	0.152311	0.188004	0	0.262711	0.427384	0.154245	0.366245	0.155918	0
Novel00769	0.242887	1.23022	0.0787707	0.037399	0.0455131	0.206682	1.618	0.210228	0.477905	0	0	0.0862394	0.102385	0.418439	0.153765
ENSGALG00000008087	0	0	0	0	0	0	0	0	0	0	0	0	0	0	0
ENSGALG00000026927	0	0	0	0	0	0	0.694124	0	0.649237	0	0	0	0	0	0
ENSGALG00000006474	81.5351	75.3278	79.6542	77.7924	74.2607	81.4227	74.4573	91.0541	97.0045	93.6041	87.2014	90.7012	81.3147	70.9617	81.1371
ENSGALG00000005435	0	0	0	0.00787322	0	0.0145035	0	0	0	0	0	0	0	0.0146816	0
ENSGALG00000025565	0	0	0	0	0	0	0	0	0	0	0	0	0	0	0
ENSGALG00000001589	1.1366	9.83658	2.80259	3.09427	2.37134	8.45037	3.36877	2.56085	0.999072	1.77152	1.69773	1.84099	1.19779	1.00934	1.6227
ENSGALG00000003206	6.84447	5.97899	5.9304	8.43567	5.7797	8.70719	4.89212	4.51303	6.14116	4.18734	4.7553	4.27631	8.48216	6.26264	5.50929
ENSGALG00000010621	22.939	19.231	24.5235	16.0194	19.3048	20.1531	20.8182	25.9164	25.0472	22.3603	21.7868	24.4162	30.2709	21.5663	26.9076
ENSGALG00000023686	6.69346	9.05381	7.36914	7.75692	9.43985	8.7934	7.41085	7.92786	5.94963	5.84344	5.79735	3.94012	6.31128	6.06911	7.75006
ENSGALG00000025191	2.45237	12.2679	8.61607	13.2163	12.2543	23.7666	8.59818	15.0352	5.36144	12.7118	7.31106	7.98178	7.75318	5.2811	9.70331
ENSGALG00000007821	63.0502	44.2791	51.5847	50.9955	54.3542	42.5174	50.7941	46.8334	56.2117	53.1205	54.4513	61.3424	49.85	57.3171	49.4653
ENSGALG00000020676	0	0	0.0691785	0	0	0.302523	0	0	0	0	0	0	0	0	0
ENSGALG00000027756	0	0	0	0	0	0	0	0	0	0	0	0	0	0	0
ENSGALG00000026955	1.96825	2.65382	2.49345	5.77718	5.76278	6.54242	2.91128	1.59712	1.81534	7.12041	1.21023	3.82181	1.55565	1.50116	0.973471
ENSGALG00000007825	1.02346	1.28995	1.32248	0.935684	0.839034	1.76901	1.17741	0.830474	0.970168	0.994699	0.743716	0.96525	0.471866	0.642827	0.531498
ENSGALG00000000443	0	0	0	0.160575	0	0	0.274222	0.112828	0.0854962	1.71177	0	0	0	0.0748579	0
ENSGALG00000005353	20.1194	26.1219	25.1533	31.6099	29.2586	36.8473	52.9946	32.4575	34.626	22.5118	37.8196	29.9013	53.6805	18.3742	27.6293
Novel01490	0	0.533469	1.99824	0	0.177626	4.03313	0	0	1.39885	0	0	1.178	3.19665	0	1.20021
ENSGALG00000004107	243.475	346.957	253.358	366.267	431.422	426.153	299.729	294.551	236.43	312.764	247.398	273.271	315.905	279.814	294.913
ENSGALG00000006219	39.5841	38.4294	39.9672	47.6709	59.01	54.6966	43.7349	49.8312	48.7165	35.7552	41.0273	49.1751	34.4538	30.0408	37.3991
ENSGALG00000025952	0	0	0	0	0	0	0	0	0	0	0	0	0	0	0
ENSGALG00000003928	0	0	0	0	0	0	0	0	0	0	0	0	0	0	0
ENSGALG00000025499	0	0	0	0	0	0.657434	0	0	0	1.6019	0	0	0	0	0
ENSGALG00000004028	0.0277458	2.60245	0.0674869	0.128167	0.0259956	2.69548	0.559352	0.240151	0.022747	0.02397	0.0496298	0.0985143	0	0.0199166	0.0439128
ENSGALG00000025242	0	0	0	0	0	0	0	0	0	0	0	0	0	0	0
ENSGALG00000027313	0.775751	1.09143	0.743316	0.624387	0.132148	1.1002	0.865401	1.48785	0.260177	1.0662	0.693805	0.719895	0.668873	0.835277	0.44646
ENSGALG00000005464	28.101	24.4683	28.3643	14.404	13.7084	18.0604	24.7393	30.0154	32.4196	26.8818	26.1273	27.8617	23.0764	31.2863	29.7282
ENSGALG00000025736	0.014136	0.013259	0.0114611	0.0652988	0.0132443	0.0400964	0.0123905	0.0611763	0.0811244	0.0244246	0	0.0125478	0.0744851	0	0
ENSGALG00000012644	54.3745	41.5564	36.0576	94.0607	66.6681	116.388	82.0813	50.8398	62.4643	50.5994	31.8201	80.1446	61.3693	60.3538	35.8573
ENSGALG00000000233	10.2054	12.0947	9.56019	10.6972	9.40015	13.0556	10.3656	9.40018	9.66701	9.50168	9.92911	7.74287	11.7358	12.1022	10.9135
ENSGALG00000003654	0	0.1026	0	0	0	0	0	0	0	0	0	0	0	0	0
ENSGALG00000016308	20.1155	19.8299	14.6647	28.6585	45.5626	33.9092	12.8629	7.43517	6.65132	8.22518	8.49377	16.1398	5.00412	10.2086	3.19119
ENSGALG00000005645	17.5336	13.486	19.1346	12.0275	13.4086	15.5378	13.6739	20.4126	18.2006	17.0482	13.376	17.3982	17.4471	20.5141	21.138
Novel01449	0	0.306697	0	0.629349	0.153178	1.50715	0	0.35377	0.402108	0.56497	0	0	0	0	0
ENSGALG00000020505	16.9605	4.74282	18.9327	49.2026	34.117	16.8576	12.4654	16.1464	24.2686	14.349	27.6368	32.51	23.5353	45.8249	34.7069
ENSGALG00000025302	0.873834	0.819621	2.12545	0.672753	1.63742	3.09825	0	2.83626	0	0	0.781527	1.55132	1.84175	0.627258	0.6915
Novel00387	1.75704	2.93927	3.17222	2.95646	3.17361	5.40765	2.60383	3.33161	2.77701	2.83242	2.13845	3.45692	2.99696	2.31444	3.06751
ENSGALG00000021553	0	0.150914	0	0.061936	0.0753735	0.285236	0.141028	0.261116	0.0659542	0.486502	0.1439	0.14282	0	0.0577475	0.190986
ENSGALG00000004364	7.32014	17.7027	8.92393	17.8983	21.765	24.4157	12.2295	9.99996	8.73442	8.97546	9.02364	7.37452	10.4095	8.02744	9.38002
ENSGALG00000005450	1.0809	2.20793	2.22014	1.60887	1.41781	2.09506	1.09481	1.68921	0.94524	1.20357	0.880792	1.83364	1.36691	0.948318	1.14048
ENSGALG00000021378	4.74231	5.50279	6.2629	5.19426	5.40508	5.78964	8.09915	6.40028	7.375	5.19509	5.33449	5.42462	4.94608	4.2113	3.86884
ENSGALG00000028069	0.0723001	3.57722	0.67412	0.0834943	0.355632	1.64061	0.459449	0.0195558	0.0148185	0.171768	0.145491	0.0320886	0.323817	0.0259493	0.114428
ENSGALG00000028152	0	0	0	0	0	0	0	0	0	0	0	0	0	0	0
ENSGALG00000001859	1.76287	3.1692	1.78661	2.03581	3.02805	2.50015	1.67394	2.62251	2.40876	1.58642	1.64234	2.86881	2.70924	2.68903	2.15067
ENSGALG00000005275	0	0	0.340072	0.565112	0.0982455	0.297432	0.735292	0.11345	0.257904	0.45295	0	0.279237	0.66303	0.225813	0.24894
ENSGALG00000026681	0	0	0	0	0	0	0	0	0	0	0	0	0	0	0
ENSGALG00000004703	0.847274	0.216739	0.562049	2.19412	0.721661	1.14701	1.0127	3.25006	3.34683	0.998143	1.30888	0.61534	0.649371	1.16109	1.09715
ENSGALG00000011856	23.5849	20.3174	19.5967	40.6294	46.9368	23.6633	17.0072	19.8164	21.5984	31.6467	25.5067	23.385	28.7325	22.513	30.709
ENSGALG00000027678	3.56544	3.48724	3.84168	2.13097	1.30764	2.17069	2.78592	3.24844	2.55768	3.37407	4.03845	6.07986	4.49896	3.44334	3.0071
ENSGALG00000005152	0	0	0	0	0	0.076685	0	0	0	0	0	0	0	0	0
Novel00256	0.252438	0.348933	0.172354	2.15829	0.410787	0.734873	0.232911	0.474362	0.17428	1.05599	0.118827	0.566087	0.448046	0.705747	0.473125
Novel00780	0.745329	1.04863	1.88842	1.36282	0.785602	0.990985	0.898278	1.41118	0.840189	1.20731	1.16654	1.24048	1.27636	0.735644	0.663535
ENSGALG00000026501	0	0	0	0	0	0	0	0	0	0	0	0	0	0	0
ENSGALG00000001615	2.3044	4.77147	2.57339	4.4688	3.21819	4.91769	2.87733	2.84599	2.70908	2.47912	1.92488	3.58928	2.47428	3.43315	3.26866
ENSGALG00000010979	4.0811	6.37984	2.50285	17.2809	11.618	10.4999	2.84338	3.73613	2.95977	2.75729	3.13525	2.74016	3.30831	5.3332	3.68499
ENSGALG00000005995	0.0257707	2.70725	0.188048	0.079362	0.120725	0.237568	0.316238	0.0557638	0	0.111318	0	0.0228754	0.054316	0.0369976	0.0203934
ENSGALG00000010010	118.681	79.329	138.429	63.976	66.8751	58.8513	110.042	121.321	116.69	118.402	120.687	158.209	84.2332	103.458	132.437
ENSGALG00000010286	92.2611	71.2071	79.1194	109.23	148.541	100.986	84.8814	73.8997	81.7493	83.2011	101.466	72.9168	88.8122	74.9401	81.2251
ENSGALG00000026968	21.2569	33.6074	24.5348	37.3045	48.8768	75.6314	28.2328	26.4129	16.9705	25.5815	20.6718	20.187	28.564	27.0525	26.9584
ENSGALG00000005393	25.1287	41.8625	34.0271	34.3612	34.1908	44.5745	37.2464	27.593	33.4849	27.5413	24.5539	25.9675	34.742	29.3183	35.111
ENSGALG00000026067	0	0	0	0	0	0	0	0	0	0	0	0	0	0	0
ENSGALG00000011673	0	3.28983	0.355467	0.472557	0.246464	0.808333	1.38344	0.0948692	0.287551	0.303012	0	0.0778343	0.277219	0.125886	0.346947
ENSGALG00000012594	0.145256	0.221397	0.147213	0.321514	0.527362	0.399139	0.572938	0.078578	0.0744289	0.156861	0.129912	0.128937	0.267883	0.156402	0.143684
ENSGALG00000017347	0.179583	0	0.0485339	0	0.11217	0	0.0524692	0.194295	0	0.0517148	0	0.0531357	0	0.0429696	0
ENSGALG00000005762	0.661075	0.516717	0.446652	0.296889	0.567759	0.585974	0.338008	0.357616	0.270986	0.333148	0.394161	0.244501	0.406386	0.632712	0.56673
ENSGALG00000013879	26.1427	34.3099	29.0769	35.6061	33.3132	42.1917	24.1701	38.1368	24.83	35.7559	25.9434	29.8811	31.8632	30.0767	31.8211
ENSGALG00000007699	877.415	866.273	894.678	826.454	967.87	870.761	687.276	1028.76	784.005	1000.23	678.778	942.85	765.169	790.978	915.299
ENSGALG00000025182	0	0	0	0	0	0	0	0	0	0	0	0	0	0	0
ENSGALG00000015021	0	0	0	0.239875	0.291918	0.515529	0.0910326	0	0	0.448619	0.278659	0.368756	0	0.0745511	0.0821865
ENSGALG00000025263	0	0	0	0	0	0	0	0	0	0	0	0	0	0	0
Novel00764	9.6427	6.81611	2.77598	11.0281	11.8495	8.17562	5.94088	10.2058	8.87927	1.44877	5.99937	2.66704	3.53454	3.05961	3.26238
ENSGALG00000006270	6.89307	6.7231	5.66973	2.86495	3.97791	4.65776	6.4797	5.94459	9.29578	4.35838	3.68555	4.89934	3.84263	5.43204	4.15037
ENSGALG00000014037	0	0	0	0	0	0.0648731	0.0801876	0	0	0	0	0	0	0	0
ENSGALG00000014107	0	0.20186	0.436221	0.124266	0.302454	0.228915	0.0943183	0.116421	0.088219	0	0.096239	0.238791	0	0	0
ENSGALG00000011525	7.82262	8.71969	5.86966	7.00758	7.1926	7.52253	6.38819	8.14806	7.18338	5.61074	4.85249	6.02367	6.31508	6.34768	4.62675
ENSGALG00000027276	0	0	0	0	0	0	0	0	0	0	0	0	0	0	0
ENSGALG00000001772	1.96844	4.58782	3.49419	4.48902	4.69451	5.3402	3.18932	3.63017	2.42069	3.18211	3.22759	2.56798	3.00161	3.68234	2.9856
ENSGALG00000011868	11.2562	9.78398	9.98632	7.94005	8.66883	7.31331	10.3311	12.7522	12.5137	10.9463	10.4361	12.5548	13.0422	11.7604	13.6177
Novel01012	3.79236	2.27488	1.71614	7.33316	14.1299	3.87749	2.12585	6.24997	2.74758	3.42865	3.234	4.22743	3.43886	3.76682	2.86146
ENSGALG00000023812	0.334317	2.00688	0.4879	0.823634	1.25291	2.27587	1.23074	1.01277	0.493352	1.03975	0.777403	0.652863	0.493239	0.431964	0.582028
ENSGALG00000028894	0	0	0	0	0	0	0	0	0	0	0	0	0	0	0
Novel01413	4.03503	5.93508	3.94067	5.08338	4.03826	6.3729	5.46591	4.06793	2.85696	3.88204	2.46054	2.93047	5.02538	3.09392	3.84621
ENSGALG00000026745	0.536953	1.55289	1.30604	8.02671	15.0086	2.88745	2.58856	6.43876	4.43881	2.93791	4.64224	4.28964	9.99684	3.37257	7.75465
ENSGALG00000028760	4.14674	9.07544	8.96553	7.9813	13.5981	27.935	4.84625	5.23419	8.4991	8.35899	7.4174	9.81561	9.46827	4.96104	15.3136
ENSGALG00000008553	5.5015	5.03947	4.42135	4.8176	3.94874	6.00009	5.23104	4.45544	4.86639	3.80781	4.4168	4.52643	5.7468	5.889	5.43558
ENSGALG00000028133	58.1805	46.5597	58.4841	46.5502	44.9235	52.3504	49.2172	57.6401	61.2175	59.3949	46.5891	62.8284	72.0956	60.5809	77.0911
ENSGALG00000007874	0.741177	10.2293	4.0348	3.42373	6.0514	8.48437	4.54757	6.07149	1.64931	2.46978	1.89395	2.63162	2.23165	3.04019	5.02734
ENSGALG00000008842	4.51922	4.17138	2.85739	5.33429	5.28987	5.63577	4.63362	4.73381	5.03174	4.21489	3.28064	4.85209	5.06569	5.43821	5.06555
ENSGALG00000014342	7.10148	10.7797	7.39879	30.1099	21.8248	21.5784	13.2911	6.60685	8.944	7.20203	6.22859	6.15137	18.0044	5.664	7.87299
ENSGALG00000006144	3.14453	4.55428	3.29936	5.05547	6.84551	5.1483	4.33701	3.40213	3.67743	2.99625	2.39877	2.46286	3.07014	2.98749	3.84237
ENSGALG00000011121	15.9811	12.9566	14.6358	11.9051	13.2757	18.0081	10.6901	11.1302	7.18747	25.5165	16.2894	16.3968	44.5582	31.5818	56.7045
ENSGALG00000026734	0	0	0	0	0	0	0	0	0	0	0	0	0	0	0
ENSGALG00000024315	0	0	0	0	0	0	0	0	0	0	0	0	0	0	0
ENSGALG00000017244	176.505	105.208	168.004	223.605	233.034	232.259	162.868	97.761	93.518	82.9336	142.487	109.877	176.055	141.281	161.557
ENSGALG00000027874	32.389	18.9285	30.9439	121.595	64.0474	7.5102	253.986	228.546	339.356	6.58774	249.307	63.551	2.59748	24.6041	112.336
ENSGALG00000028621	0	0	0	0	0	0	0	0	0	0	0	0	0	0	0
Novel00472	0	0.255479	0.220837	0.0931998	0.340261	0.708207	2.17522	0.0982304	0	0.0261456	0.0812017	0.0805919	0	0.0434486	0.119746
ENSGALG00000027816	0	0	0	0	0	0	0	0	0	0	0	0	0	0	0
ENSGALG00000005547	1.44159	8.16395	2.07298	1.29833	0.917426	3.79971	4.4106	1.23598	1.38256	1.29241	1.4596	1.44864	1.60519	1.01528	0.882498
ENSGALG00000005123	0	0	0	0	0.0678361	0.256712	0.0634627	0	0	0	0	0	0.0763011	0.0519728	0.0572957
ENSGALG00000014247	8.7816	8.98201	8.81512	9.30419	6.69966	9.60765	8.68686	8.32469	9.08503	5.92473	6.05877	8.24041	6.87465	8.19472	7.28015
ENSGALG00000009929	0.236834	0.33321	0.192019	0.36467	0.221894	0	0.103794	0	0.194164	1.12532	0.317724	0.525563	0.249583	0.0850022	0.46854
ENSGALG00000011642	5.86464	10.8839	7.78917	11.0682	11.6629	13.714	8.32073	6.94997	6.38889	5.04683	6.55131	5.96534	6.58917	6.83883	6.29324
ENSGALG00000000469	0.324887	0.203154	0.175607	0.0833754	0.152196	0.230383	0.33223	0.175751	0.799061	0.327453	0.435852	1.73032	0.0570628	0.27208	0.814138
ENSGALG00000002369	0	0.108041	0.0311303	0.147802	0.0719474	0.136135	0.0336545	0.0830824	0.0314782	0.0995118	0.0686796	0.034082	0.121388	0.0275613	0
ENSGALG00000020077	0	0	0	0	0	0	0	0	0	0	0	0	0	0	0
ENSGALG00000011163	69.8517	34.1116	69.0037	28.9095	27.1834	28.3046	46.9181	62.0943	59.5131	63.1613	52.1296	61.8759	53.6438	83.8652	72.8499
ENSGALG00000026900	20.2896	19.2912	15.0326	22.9075	22.0263	26.3348	23.9879	20.12	20.4798	14.4352	15.1426	14.3144	21.1771	20.4419	19.9876
Novel01409	4.84464	22.0213	6.49617	6.59891	4.53904	18.4984	5.22634	11.491	4.43009	6.11705	7.33256	8.10449	4.51635	6.15266	7.37261
ENSGALG00000016127	304.605	154.299	316.374	116.715	129.946	100.616	220.962	233.622	330.384	405.436	400.815	545.473	371.025	512.421	366.221
ENSGALG00000025446	0	0	0	0	0	0	0	0	0	0	0	0	0	0	0
ENSGALG00000007606	15976.3	10498.7	14489.5	2801.75	2531.73	2551.16	12196.1	14055.6	10238.7	16543.6	18808.3	14419.1	19793.8	13779.4	15294.1
ENSGALG00000020736	21.9764	13.6105	11.8502	7.36678	8.571	10.7372	15.3917	18.2023	17.9308	15.0795	7.33533	25.0142	19.7243	18.4924	20.3031
ENSGALG00000016024	0.425392	0.627	0.270991	0.725186	0.341621	0.88341	0.532661	0.328743	0.124554	0.420002	0.271754	0.296685	0.960625	0.5889	0.24045
ENSGALG00000027649	0	0	0	0	0	0	0	0	0	0	0	0	0	0	0
ENSGALG00000002082	165.291	74.4728	123.432	33.6081	24.3952	23.547	102.222	160.99	120.49	128.606	175.488	210.408	223.004	266.373	214.492
ENSGALG00000026818	3.99868	7.59266	2.13499	1.68943	16.4935	3.5617	20.1318	44.5815	4.55757	6.69838	35.1958	50.9905	12.6932	9.3461	21.5328
Novel01272	2.44908	5.40785	4.21952	2.9854	6.88378	7.52563	4.91943	3.75376	3.30457	3.21777	5.7041	4.5743	6.18346	3.66251	2.62445
ENSGALG00000027296	0	0	0	0	0	0	0	0	0	0	0	0	0	0	0
ENSGALG00000027776	7.60236	10.3719	10.0862	18.0909	6.47527	21.5638	15.1445	18.6935	11.3321	7.16485	8.03552	12.2695	16.0232	8.43376	19.6889
ENSGALG00000024484	0	0.541744	0	0.0555836	0	0	0	0	0	0	0	0	0.0760837	0	0
ENSGALG00000016042	0.956089	2.58162	1.50337	1.67291	1.38438	1.9723	1.90461	1.81806	1.71019	1.87722	1.2956	1.62019	2.10671	1.85094	2.01758
ENSGALG00000006749	2.1744	2.79487	1.99148	3.41009	2.60314	3.62633	2.40002	2.3961	2.40988	2.122	2.55693	1.78714	2.80067	2.48577	1.88002
ENSGALG00000004176	46.2262	66.1705	69.9957	97.2185	100.353	79.7222	58.8711	44.9595	67.2125	68.0433	55.4603	60.3338	49.2239	48.6749	59.6507
ENSGALG00000019233	0.168008	0.157585	0.136217	0.388041	0.31482	0.297843	0.0736308	0.0908857	0.0688693	0.145144	0.450781	0.0745661	0.177052	0.2412	0.664757
ENSGALG00000026726	0	0	0	0	0	0	0	0	0	0	0	0	0	0	0
ENSGALG00000022810	0	0	0	0.0834943	0	0.0769038	0	0	0	0	0	0	0	0	0
ENSGALG00000013886	10.9138	17.6769	12.8628	53.5291	59.7058	46.4347	21.4187	10.3678	10.9115	6.07106	7.4754	8.03361	11.2207	16.0122	13.1022
ENSGALG00000006336	0.893117	1.38108	0.870898	1.28228	1.39086	1.65178	1.26946	1.03157	1.16758	0.688162	0.820361	1.01775	0.852164	0.978976	0.888225
ENSGALG00000009421	18.1446	24.9036	13.6684	49.8296	44.5874	48.0789	16.3067	26.4398	15.4781	14.0483	13.5575	23.8125	33.3051	44.3166	30.9345
ENSGALG00000009217	1.40404	3.34051	2.1379	4.93019	4.04267	4.27391	2.28123	1.29676	1.65643	1.30172	1.62325	1.61106	1.94877	1.10618	1.30077
ENSGALG00000026974	0.063195	0.355646	0.102474	0	0.0592086	0.0448126	0.0553914	0	0.155428	0	0	0	0.066597	0	0
ENSGALG00000026594	1.14294	0.653271	0.781878	1.91111	1.55607	0.658515	0.970501	1.5264	1.42018	4.79817	1.40554	3.39235	5.66478	2.82023	7.10847
ENSGALG00000013750	0.0624167	0.175633	0.202424	0.0961076	0.0584794	0.0442607	0.0547093	0.13506	0.102343	0.0539226	0	0.166213	0.131554	0	0.0987858
ENSGALG00000010265	1.16883	0.676448	0.41334	0.325483	0.1165	0.546679	0.577642	0.201795	0.356794	0.483399	0.244659	0.651203	1.17933	0.0981821	0.265675
ENSGALG00000004874	16.7029	25.8262	22.0781	25.329	26.746	29.5749	25.8203	23.1093	18.6731	22.2133	14.5764	17.7916	20.3757	15.0417	19.3058
Novel01728	1.0123	0.284848	1.31319	1.3249	1.32782	1.93816	0.976025	0.876182	3.07069	2.36125	1.72019	1.43771	3.0937	1.08997	0.961287
ENSGALG00000007505	3.28966	25.0236	5.27572	6.48472	5.5885	13.3556	7.9849	5.39739	3.46754	6.2461	4.36473	4.42823	3.962	2.90632	3.46145
ENSGALG00000008014	251.717	512.515	229.628	238.743	126.002	198.979	437.623	341.757	348.701	101.544	164.781	110.966	48.7028	83.2117	42.9109
ENSGALG00000028082	0	0	0	0	0	0	0	0	0	0	0	0	0	0	0
ENSGALG00000027582	46.3798	75.5882	45.761	49.2343	77.6196	58.5731	44.9545	59.2594	40.277	42.5697	51.0934	52.888	42.8769	57.0023	47.8099
Novel00529	55.0585	60.7257	53.7866	51.3046	63.745	45.5913	51.6286	66.6438	71.7801	75.0357	61.6088	71.027	48.3432	102.156	81.2147
ENSGALG00000007035	34.6124	22.6095	27.4364	21.0563	14.1877	19.723	23.4309	30.4264	41.5512	37.2441	33.1672	35.6614	39.2439	33.2752	33.6263
Novel01619	1385.58	1224.74	1082.82	828.587	1041.63	914.435	773.102	1180.14	876.482	1092.23	1504.16	998.273	1129.91	1109.56	886.378
ENSGALG00000005971	0.21001	1.18188	0.340542	0.808419	0.787049	1.07968	0.368154	0.340821	0.946953	0.680364	1.03304	0.60585	0.276644	0.15075	0.498568
ENSGALG00000019891	2.61873	6.84137	3.85563	4.50227	4.06415	6.99503	4.47807	3.25043	3.5826	2.78978	2.47142	2.88069	3.89406	2.86004	3.54708
Novel00257	0.309398	0.248745	0.609213	0.612518	0.496939	0.689541	0.697352	0.286924	0.072473	0.343663	0.434838	0.274637	0.698687	0.190365	0.629587
Novel01196	184.065	106.443	183.891	465.018	426.629	365.008	175.507	112.2	155.235	114.119	159.402	85.6129	115.354	167.224	138.17
ENSGALG00000007868	0.362401	0.566528	0.555004	0.341009	0.264087	1.42769	0.247061	0.304958	0.132048	0.521804	0.252092	0.679112	0.509213	0.404661	0.223053
ENSGALG00000011452	25.9192	76.3576	43.3242	65.5559	55.7511	91.1868	50.3969	29.9186	30.9389	29.2514	26.9359	26.8552	30.4884	32.6249	32.2469
ENSGALG00000000129	20.6627	23.2623	25.88	24.2629	24.3482	23.7021	23.3872	21.7918	21.8749	24.401	26.0894	24.1467	29.0943	25.2188	24.3207
ENSGALG00000010458	0.0543414	0.30582	0.30841	0.37653	0.763702	0.88629	0.285786	0.176379	0.178204	0.845032	0.048601	0.192944	0.859001	0.351067	0.731043
ENSGALG00000028660	0	0	0	0	0	0	0	0	1.36982	0	0	0	0	0	0
ENSGALG00000027409	2.29152	3.48762	3.1783	11.717	8.66888	7.96124	3.71392	2.22976	3.17837	2.71427	2.93884	2.90398	2.74901	2.05871	2.73716
ENSGALG00000009935	0.104687	0.157107	0.118828	7.25373	1.7655	0.623575	0.440446	0.271831	0.0686607	0.217057	0.13108	0.408871	0.176516	0.105205	0.0828429
ENSGALG00000002470	11.652	7.37007	14.1571	9.38437	10.0361	7.23874	5.53337	10.4994	8.03861	7.39745	12.8838	10.9092	6.68814	18.5601	11.7983
ENSGALG00000007135	0.2103	0.986266	0.170506	0.161907	0.295552	0.223691	0.276497	0.79635	0.862057	0.363363	0.0940427	0.28001	0.221621	0.452875	0.499258
ENSGALG00000014707	0.035979	0	0	0	0.101128	0.0510266	0	0.0389264	0.0589936	0.0621654	0	0	0	0	0
[truncated: 16,933 more rows]
